# Supplementary material
Source: publisher figshare collection journal article supplement (https://brill.figshare.com/articles/dataset/_/5379217)
Supplement: Supplementary file 1 [file 1]

## Sheet: Sheet1
GO, accession	Description	Term type	Corrected p-value	DEG item	DEG list	Bg item	Bg list	Gene names
GO:0042302	structural constituent of cuticle	molecular function	4.58E-08	16	291	98	21672	c19629, g1,c24062, g1,c21482, g2,c21817, g1,c21289, g1,c20518, g1,c22288, g1,c20162, g1,c19342, g1,c21997, g1,c22916, g1,c21482, g1,c22933, g1,c22167, g1,c17485, g1,c23989, g1
GO:0030246	carbohydrate binding	molecular function	4.24E-06	18	291	206	21672	c24177, g1,c23639, g2,c23639, g3,c23934, g3,c18640, g1,c21979, g1,c26955, g1,c22123, g1,c22845, g2,c20725, g1,c47202, g1,c23556, g1,c46600, g1,c3234, g1,c16415, g1,c18640, g2,c20495, g1,c23639, g1
GO:0016491	oxidoreductase activity	molecular function	0.00016388	57	291	2222	21672	c24537, g1,c25838, g1,c24608, g1,c25705, g1,c25925, g1,c19212, g1,c25827, g1,c22122, g1,c26451, g1,c22816, g1,c25889, g1,c21880, g1,c26401, g2,c47020, g1,c22643, g1,c23989, g1,c23602, g2,c25016, g1,c19549, g1,c22357, g1,c25253, g2,c25253, g1,c21280, g1,c3262, g1,c18546, g1,c21604, g1,c22936, g1,c22168, g1,c22288, g1,c20511, g1,c44009, g1,c24852, g1,c22737, g1,c22808, g1,c31140, g1,c25375, g1,c220…
GO:0055114	oxidation-reduction process	biological process	0.0061533	53	291	2278	21672	c19631, g1,c21769, g1,c42901, g1,c22883, g2,c24308, g1,c23637, g1,c31181, g1,c24727, g1,c22883, g1,c17572, g1,c21629, g1,c23942, g1,c24852, g1,c44009, g1,c22737, g1,c25375, g1,c31140, g1,c22808, g1,c25365, g1,c23301, g1,c22006, g1,c23572, g1,c24150, g1,c25528, g1,c23005, g1,c25253, g1,c25253, g2,c21280, g1,c3262, g1,c22288, g1,c25710, g1,c22168, g1,c23751, g1,c21604, g1,c22936, g1,c25705, g1,c192…
GO:0006633	fatty acid biosynthetic process	biological process	0.039081	10	291	151	21672	c21629, g1,c25016, g1,c21108, g1,c21880, g1,c23400, g1,c25090, g1,c22167, g1,c19631, g1,c21280, g1,c21838, g1
GO:0000079	regulation of cyclin-dependent protein serine/threonine kinase activity	biological process	0.056814	5	291	25	21672	c22308, g1,c22053, g1,c24876, g1,c23930, g1,c21198, g1
GO:0072330	monocarboxylic acid biosynthetic process	biological process	0.065325	10	291	162	21672	c21880, g1,c21108, g1,c25016, g1,c21629, g1,c21838, g1,c21280, g1,c19631, g1,c22167, g1,c25090, g1,c23400, g1
GO:0071900	regulation of protein serine/threonine kinase activity	biological process	0.070299	5	291	32	21672	c22053, g1,c24876, g1,c22308, g1,c21198, g1,c23930, g1
GO:0006631	fatty acid metabolic process	biological process	0.19499	10	291	201	21672	c21838, g1,c21280, g1,c19631, g1,c25090, g1,c22167, g1,c23400, g1,c21880, g1,c21108, g1,c25016, g1,c21629, g1
GO:0009620	response to fungus	biological process	0.32794	3	291	10	21672	c18303, g1,c22943, g1,c21869, g1
GO:0050832	defense response to fungus	biological process	0.32794	3	291	10	21672	c21869, g1,c18303, g1,c22943, g1
GO:0019900	kinase binding	molecular function	0.32794	5	291	43	21672	c22053, g1,c24876, g1,c22308, g1,c21198, g1,c23930, g1
GO:0019901	protein kinase binding	molecular function	0.32794	5	291	43	21672	c21198, g1,c23930, g1,c22053, g1,c24876, g1,c22308, g1
GO:0020037	heme binding	molecular function	0.36653	13	291	372	21672	c24150, g1,c25528, g1,c21467, g1,c23942, g1,c23637, g1,c47020, g1,c31140, g1,c25705, g1,c25253, g2,c25253, g1,c21280, g1,c23468, g1,c42901, g1
GO:0004553	hydrolase activity, hydrolyzing O-glycosyl compounds	molecular function	0.39483	14	291	392	21672	c25409, g1,c24634, g2,c21979, g1,c11792, g1,c17599, g1,c24621, g1,c23639, g2,c17336, g1,c26628, g1,c23934, g3,c23984, g1,c20495, g1,c25361, g1,c21720, g1
GO:0046906	tetrapyrrole binding	molecular function	0.39586	13	291	383	21672	c23468, g1,c25705, g1,c25253, g2,c25253, g1,c21280, g1,c42901, g1,c31140, g1,c47020, g1,c23637, g1,c21467, g1,c24150, g1,c25528, g1,c23942, g1
GO:0005198	structural molecule activity	molecular function	0.39586	35	291	1824	21672	c22933, g1,c21364, g2,c22916, g1,c21997, g1,c20162, g1,c24062, g1,c21817, g1,c19629, g1,c22009, g1,c10710, g1,c21721, g1,c19993, g1,c23152, g1,c18044, g1,c15972, g1,c21482, g1,c23404, g1,c19342, g1,c22288, g1,c22168, g1,c20180, g2,c20518, g1,c24688, g1,c21289, g1,c21482, g2,c19311, g1,c25731, g1,c17117, g1,c23989, g1,c18370, g1,c22416, g4,c17485, g1,c18074, g1,c22170, g3,c22167, g1
GO:0044710	single-organism metabolic process	biological process	0.46334	95	291	5281	21672	c23517, g2,c24308, g1,c23400, g1,c22258, g1,c24705, g1,c42901, g1,c19631, g1,c20300, g1,c31181, g1,c23637, g1,c21840, g1,c25375, g1,c22808, g1,c16769, g1,c25467, g1,c44009, g1,c22926, g1,c19566, g4,c25528, g1,c22006, g1,c25365, g1,c25356, g1,c23406, g1,c23856, g1,c22893, g1,c3262, g1,c21280, g1,c25253, g1,c23404, g1,c20511, g1,c22936, g1,c21604, g1,c23751, g1,c22288, g1,c22816, g1,c22122, g1,c215…
GO:0016053	organic acid biosynthetic process	biological process	0.46334	17	291	554	21672	c22122, g1,c22167, g1,c25467, g1,c25838, g1,c24608, g1,c21838, g1,c25016, g1,c25889, g1,c21880, g1,c25090, g1,c23400, g1,c22258, g1,c19631, g1,c21280, g1,c20300, g1,c21108, g1,c21629, g1
GO:0046394	carboxylic acid biosynthetic process	biological process	0.46334	17	291	554	21672	c20300, g1,c21629, g1,c21108, g1,c21280, g1,c19631, g1,c25090, g1,c22258, g1,c23400, g1,c25889, g1,c21880, g1,c25016, g1,c25838, g1,c21838, g1,c24608, g1,c22122, g1,c22167, g1,c25467, g1
GO:0004129	cytochrome-c oxidase activity	molecular function	0.46334	6	291	110	21672	c47020, g1,c44009, g1,c42901, g1,c17572, g1,c25375, g1,c31140, g1
GO:0016675	oxidoreductase activity, acting on a heme group of donors	molecular function	0.46334	6	291	110	21672	c17572, g1,c31140, g1,c25375, g1,c47020, g1,c42901, g1,c44009, g1
GO:0016676	oxidoreductase activity, acting on a heme group of donors, oxygen as acceptor	molecular function	0.46334	6	291	110	21672	c42901, g1,c44009, g1,c47020, g1,c25375, g1,c31140, g1,c17572, g1
GO:0045277	respiratory chain complex IV	cellular component	0.46334	6	291	110	21672	c25375, g1,c31140, g1,c17572, g1,c44009, g1,c42901, g1,c47020, g1
GO:0006123	mitochondrial electron transport, cytochrome c to oxygen	biological process	0.46334	6	291	112	21672	c17572, g1,c31140, g1,c25375, g1,c47020, g1,c44009, g1,c42901, g1
GO:0016798	hydrolase activity, acting on glycosyl bonds	molecular function	0.46334	14	291	419	21672	c21720, g1,c23984, g1,c25361, g1,c20495, g1,c17599, g1,c24621, g1,c11792, g1,c23934, g3,c26628, g1,c23639, g2,c17336, g1,c21979, g1,c25409, g1,c24634, g2
GO:0015002	heme-copper terminal oxidase activity	molecular function	0.4819	6	291	120	21672	c44009, g1,c42901, g1,c47020, g1,c25375, g1,c31140, g1,c17572, g1
GO:0005581	collagen	cellular component	0.4819	3	291	13	21672	c22933, g1,c24062, g1,c19629, g1
GO:0043549	regulation of kinase activity	biological process	0.4819	5	291	68	21672	c22308, g1,c22053, g1,c24876, g1,c23930, g1,c21198, g1
GO:0045859	regulation of protein kinase activity	biological process	0.4819	5	291	68	21672	c23930, g1,c21198, g1,c22308, g1,c22053, g1,c24876, g1
GO:0008299	isoprenoid biosynthetic process	biological process	0.4819	6	291	87	21672	c22926, g1,c23400, g1,c23018, g1,c25365, g1,c23637, g1,c23301, g1
GO:0006720	isoprenoid metabolic process	biological process	0.4819	6	291	89	21672	c22926, g1,c23400, g1,c23637, g1,c25365, g1,c23018, g1,c23301, g1
GO:0051338	regulation of transferase activity	biological process	0.4819	5	291	69	21672	c21198, g1,c23930, g1,c22053, g1,c24876, g1,c22308, g1
GO:0001932	regulation of protein phosphorylation	biological process	0.4819	5	291	70	21672	c21198, g1,c23930, g1,c24876, g1,c22053, g1,c22308, g1
GO:0042325	regulation of phosphorylation	biological process	0.4819	5	291	71	21672	c21198, g1,c23930, g1,c22053, g1,c24876, g1,c22308, g1
GO:0070469	respiratory chain	cellular component	0.4819	7	291	184	21672	c17572, g1,c31140, g1,c25375, g1,c47020, g1,c31181, g1,c42901, g1,c44009, g1
GO:0032787	monocarboxylic acid metabolic process	biological process	0.4819	14	291	452	21672	c9941, g2,c25356, g1,c21880, g1,c21629, g1,c25016, g1,c21108, g1,c19631, g1,c21280, g1,c21838, g1,c25838, g1,c23400, g1,c22167, g1,c25090, g1,c22122, g1
GO:0010876	lipid localization	biological process	0.51185	6	291	87	21672	c26939, g1,c18256, g1,c12304, g1,c23989, g1,c1966, g1,c22487, g1
GO:0031399	regulation of protein modification process	biological process	0.5347	5	291	76	21672	c22308, g1,c22053, g1,c24876, g1,c23930, g1,c21198, g1
GO:0005319	lipid transporter activity	molecular function	0.60464	4	291	35	21672	c18256, g1,c26939, g1,c1966, g1,c12304, g1
GO:0004315	3-oxoacyl-[acyl-carrier-protein] synthase activity	molecular function	0.60464	3	291	13	21672	c21838, g1,c21108, g1,c23400, g1
GO:0004312	fatty acid synthase activity	molecular function	0.62679	3	291	15	21672	c21838, g1,c23400, g1,c21108, g1
GO:0005835	fatty acid synthase complex	cellular component	0.62679	3	291	15	21672	c21838, g1,c21108, g1,c23400, g1
GO:0006118	electron transport	biological process	0.62679	13	291	464	21672	c23602, g1,c23572, g1,c21604, g1,c47020, g1,c31181, g1,c23942, g1,c19846, g1,c22883, g1,c17572, g1,c42901, g1,c22365, g1,c24852, g1,c31140, g1
GO:0042742	defense response to bacterium	biological process	0.65665	4	291	52	21672	c18303, g1,c22943, g1,c21869, g1,c25824, g1
GO:0006869	lipid transport	biological process	0.65665	5	291	65	21672	c1966, g1,c22487, g1,c12304, g1,c18256, g1,c26939, g1
GO:0009617	response to bacterium	biological process	0.76958	4	291	54	21672	c21869, g1,c22943, g1,c18303, g1,c25824, g1
GO:0072593	reactive oxygen species metabolic process	biological process	0.88541	3	291	36	21672	c19212, g1,c22288, g1,c25253, g2
GO:0008191	metalloendopeptidase inhibitor activity	molecular function	1	2	291	9	21672	c17531, g1,c18898, g2
GO:0010576	metalloenzyme regulator activity	molecular function	1	2	291	9	21672	c18898, g2,c17531, g1
GO:0048551	metalloenzyme inhibitor activity	molecular function	1	2	291	9	21672	c17531, g1,c18898, g2
GO:0003824	catalytic activity	molecular function	1	159	291	10047	21672	c22122, g1,c21583, g1,c17336, g1,c22357, g1,c25889, g1,c20884, g1,c22643, g1,c23357, g1,c23406, g1,c22893, g1,c23934, g3,c3262, g1,c21280, g1,c20100, g1,c23404, g1,c21398, g1,c21604, g1,c1992, g1,c25375, g1,c22808, g1,c24634, g2,c22565, g1,c25467, g1,c44009, g1,c22926, g1,c25528, g1,c13329, g1,c22006, g1,c25356, g1,c24308, g1,c42901, g1,c24177, g1,c22063, g2,c23637, g1,c18303, g1,c23556, g1,c2460…
GO:0044711	single-organism biosynthetic process	biological process	1	20	291	814	21672	c23856, g1,c23400, g1,c22258, g1,c25090, g1,c21280, g1,c19631, g1,c21108, g1,c21629, g1,c20511, g1,c20300, g1,c25467, g1,c22167, g1,c22122, g1,c22737, g1,c21838, g1,c24608, g1,c25838, g1,c25016, g1,c21880, g1,c25889, g1
GO:0008610	lipid biosynthetic process	biological process	1	18	291	572	21672	c23400, g1,c25090, g1,c21280, g1,c19631, g1,c31549, g1,c21629, g1,c21108, g1,c23637, g1,c21583, g1,c22167, g1,c21838, g1,c25016, g1,c22926, g1,c23301, g1,c25365, g1,c23018, g1,c21880, g1,c22006, g1
GO:0009055	electron carrier activity	molecular function	1	8	291	264	21672	c23602, g1,c31181, g1,c47020, g1,c19846, g1,c17572, g1,c42901, g1,c22365, g1,c31140, g1
GO:0003785	actin monomer binding	molecular function	1	1	291	1	21672	c23030, g1
GO:0044283	small molecule biosynthetic process	biological process	1	19	291	789	21672	c25016, g1,c25889, g1,c21880, g1,c22737, g1,c22122, g1,c22167, g1,c25467, g1,c25838, g1,c24608, g1,c21838, g1,c20511, g1,c20300, g1,c21108, g1,c21629, g1,c25090, g1,c23400, g1,c22258, g1,c21280, g1,c19631, g1
GO:0008234	cysteine-type peptidase activity	molecular function	1	7	291	176	21672	c1992, g1,c39017, g1,c13329, g1,c2648, g1,c23406, g1,c15288, g1,c6643, g1
GO:0044420	extracellular matrix part	cellular component	1	5	291	79	21672	c22933, g1,c24062, g1,c18256, g1,c19629, g1,c20118, g1
GO:0006629	lipid metabolic process	biological process	1	25	291	969	21672	c21280, g1,c11792, g1,c19631, g1,c23468, g1,c25090, g1,c23400, g1,c23637, g1,c21108, g1,c31549, g1,c21629, g1,c21838, g1,c23556, g1,c22816, g1,c22167, g1,c21583, g1,c22006, g1,c21880, g1,c26197, g1,c23018, g1,c25365, g1,c23301, g1,c22926, g1,c25016, g1,c21467, g1,c22357, g1
GO:0005506	iron ion binding	molecular function	1	9	291	323	21672	c23572, g1,c47020, g1,c24150, g1,c21629, g1,c25528, g1,c42901, g1,c19631, g1,c25705, g1,c21280, g1
GO:0016114	terpenoid biosynthetic process	biological process	1	4	291	65	21672	c23637, g1,c25365, g1,c23018, g1,c23301, g1
GO:0006721	terpenoid metabolic process	biological process	1	4	291	66	21672	c25365, g1,c23637, g1,c23018, g1,c23301, g1
GO:0030248	cellulose binding	molecular function	1	2	291	23	21672	c23934, g3,c21979, g1
GO:0005576	extracellular region	cellular component	1	23	291	972	21672	c30916, g1,c22933, g1,c24337, g1,c22168, g1,c24062, g1,c23406, g1,c21979, g1,c23993, g1,c19629, g1,c23934, g3,c26939, g1,c15381, g1,c21879, g1,c18256, g1,c21006, g1,c17117, g1,c21721, g1,c23956, g1,c23089, g3,c22456, g1,c22487, g1,c20118, g1,c15632, g1
GO:0016109	tetraterpenoid biosynthetic process	biological process	1	3	291	36	21672	c23637, g1,c25365, g1,c23301, g1
GO:0016117	carotenoid biosynthetic process	biological process	1	3	291	36	21672	c23637, g1,c25365, g1,c23301, g1
GO:0016108	tetraterpenoid metabolic process	biological process	1	3	291	37	21672	c23301, g1,c25365, g1,c23637, g1
GO:0016116	carotenoid metabolic process	biological process	1	3	291	37	21672	c23637, g1,c25365, g1,c23301, g1
GO:0006801	superoxide metabolic process	biological process	1	2	291	26	21672	c22288, g1,c19212, g1
GO:0044255	cellular lipid metabolic process	biological process	1	20	291	758	21672	c23637, g1,c21629, g1,c31549, g1,c21108, g1,c11792, g1,c21280, g1,c19631, g1,c23400, g1,c25090, g1,c23301, g1,c25365, g1,c23018, g1,c26197, g1,c21880, g1,c25016, g1,c22926, g1,c21838, g1,c21583, g1,c22167, g1,c23556, g1
GO:0016705	oxidoreductase activity, acting on paired donors, with incorporation or reduction of molecular oxygen	molecular function	1	8	291	254	21672	c22816, g1,c25705, g1,c23989, g1,c25528, g1,c23637, g1,c26401, g2,c25365, g1,c23301, g1
GO:0009607	response to biotic stimulus	biological process	1	5	291	111	21672	c25824, g1,c21869, g1,c25050, g1,c22943, g1,c18303, g1
GO:0051726	regulation of cell cycle	biological process	1	5	291	112	21672	c23930, g1,c21198, g1,c22308, g1,c22053, g1,c24876, g1
GO:0004096	catalase activity	molecular function	1	2	291	14	21672	c25253, g1,c25253, g2
GO:0044445	cytosolic part	cellular component	1	5	291	153	21672	c21108, g1,c23400, g1,c25710, g1,c21838, g1,c22416, g4
GO:0008152	metabolic process	biological process	1	185	291	12685	21672	c24705, g3,c25090, g1,c14174, g1,c22883, g2,c23405, g1,c26330, g1,c21006, g1,c19609, g1,c22883, g1,c17572, g1,c24222, g1,c22471, g1,c24727, g1,c26955, g1,c31140, g1,c22001, g1,c6643, g1,c19812, g2,c24852, g1,c21865, g1,c21838, g1,c20055, g1,c26623, g1,c23005, g1,c25950, g1,c23572, g1,c2648, g1,c23301, g1,c24688, g1,c18517, g1,c24684, g1,c25731, g1,c23468, g1,c31549, g1,c25710, g1,c26451, g1,c1807…
GO:0022904	respiratory electron transport chain	biological process	1	7	291	261	21672	c25375, g1,c31140, g1,c17572, g1,c44009, g1,c42901, g1,c31181, g1,c47020, g1
GO:0004397	histidine ammonia-lyase activity	molecular function	1	1	291	1	21672	c25356, g1
GO:0015942	formate metabolic process	biological process	1	1	291	1	21672	c25356, g1
GO:0019557	histidine catabolic process to glutamate and formate	biological process	1	1	291	1	21672	c25356, g1
GO:0006636	unsaturated fatty acid biosynthetic process	biological process	1	1	291	1	21672	c25090, g1
GO:0019370	leukotriene biosynthetic process	biological process	1	1	291	1	21672	c25090, g1
GO:0046456	icosanoid biosynthetic process	biological process	1	1	291	1	21672	c25090, g1
GO:1901570	fatty acid derivative biosynthetic process	biological process	1	1	291	1	21672	c25090, g1
GO:0009506	plasmodesma	cellular component	1	1	291	4	21672	c22416, g4
GO:0055044	symplast	cellular component	1	1	291	4	21672	c22416, g4
GO:0004819	glutamine-tRNA ligase activity	molecular function	1	1	291	4	21672	c22943, g1
GO:0006425	glutaminyl-tRNA aminoacylation	biological process	1	1	291	4	21672	c22943, g1
GO:0070008	serine-type exopeptidase activity	molecular function	1	3	291	64	21672	c22565, g1,c22001, g1,c23406, g1
GO:0008759	UDP-3-O-[3-hydroxymyristoyl] N-acetylglucosamine deacetylase activity	molecular function	1	1	291	3	21672	c31549, g1
GO:0019556	histidine catabolic process to glutamate and formamide	biological process	1	1	291	3	21672	c25356, g1
GO:0043606	formamide metabolic process	biological process	1	1	291	3	21672	c25356, g1
GO:0004488	methylenetetrahydrofolate dehydrogenase (NADP+) activity	molecular function	1	2	291	21	21672	c25838, g1,c25016, g1
GO:0018580	nitronate monooxygenase activity	molecular function	1	2	291	28	21672	c22168, g1,c22643, g1
GO:0004866	endopeptidase inhibitor activity	molecular function	1	4	291	96	21672	c21006, g1,c18898, g2,c17531, g1,c38878, g1
GO:0061135	endopeptidase regulator activity	molecular function	1	4	291	96	21672	c38878, g1,c17531, g1,c18898, g2,c21006, g1
GO:0042775	mitochondrial ATP synthesis coupled electron transport	biological process	1	6	291	233	21672	c44009, g1,c42901, g1,c47020, g1,c31140, g1,c25375, g1,c17572, g1
GO:0005578	proteinaceous extracellular matrix	cellular component	1	6	291	152	21672	c18256, g1,c22168, g1,c19629, g1,c20118, g1,c22933, g1,c24062, g1
GO:0000160	phosphorelay signal transduction system	biological process	1	3	291	66	21672	c23005, g1,c21163, g1,c25731, g1
GO:0005507	copper ion binding	molecular function	1	3	291	82	21672	c19846, g1,c31140, g1,c22365, g1
GO:0050662	coenzyme binding	molecular function	1	13	291	609	21672	c22122, g1,c24608, g1,c23704, g1,c20511, g1,c23942, g1,c23602, g2,c23637, g1,c25365, g1,c23301, g1,c21604, g1,c22006, g1,c22936, g1,c23572, g1
GO:0000981	sequence-specific DNA binding RNA polymerase II transcription factor activity	molecular function	1	3	291	72	21672	c25418, g1,c15875, g1,c24337, g1
GO:0032268	regulation of cellular protein metabolic process	biological process	1	9	291	405	21672	c22643, g1,c21198, g1,c25889, g1,c23930, g1,c22053, g1,c11792, g1,c19812, g2,c24876, g1,c22308, g1
GO:0006576	cellular biogenic amine metabolic process	biological process	1	7	291	237	21672	c25253, g2,c25253, g1,c20055, g1,c24705, g1,c21880, g1,c25016, g1,c24705, g3
GO:0042773	ATP synthesis coupled electron transport	biological process	1	6	291	240	21672	c47020, g1,c44009, g1,c42901, g1,c17572, g1,c25375, g1,c31140, g1
GO:0003995	acyl-CoA dehydrogenase activity	molecular function	1	3	291	45	21672	c22883, g1,c23942, g1,c21604, g1
GO:0009878	nodule morphogenesis	biological process	1	2	291	30	21672	c26955, g1,c16663, g1
GO:0001682	tRNA 5'-leader removal	biological process	1	1	291	3	21672	c21769, g1
GO:0005829	cytosol	cellular component	1	5	291	194	21672	c21838, g1,c22416, g4,c25710, g1,c23400, g1,c21108, g1
GO:0004185	serine-type carboxypeptidase activity	molecular function	1	2	291	36	21672	c22565, g1,c22001, g1
GO:0009372	quorum sensing	biological process	1	1	291	4	21672	c25880, g2
GO:0048872	homeostasis of number of cells	biological process	1	1	291	4	21672	c25880, g2
GO:0048874	homeostasis of number of cells in a free-living population	biological process	1	1	291	4	21672	c25880, g2
GO:0030414	peptidase inhibitor activity	molecular function	1	4	291	108	21672	c38878, g1,c21006, g1,c18898, g2,c17531, g1
GO:0061134	peptidase regulator activity	molecular function	1	4	291	108	21672	c21006, g1,c18898, g2,c17531, g1,c38878, g1
GO:0016703	oxidoreductase activity, acting on single donors with incorporation of molecular oxygen, incorporation of one atom of oxygen (internal monooxygenases or internal mixed function oxidases)	molecular function	1	2	291	32	21672	c22168, g1,c22643, g1
GO:0009886	post-embryonic morphogenesis	biological process	1	2	291	33	21672	c26955, g1,c16663, g1
GO:0000150	recombinase activity	molecular function	1	1	291	4	21672	c21997, g1
GO:0009653	anatomical structure morphogenesis	biological process	1	7	291	235	21672	c22816, g1,c17117, g1,c23989, g1,c25950, g1,c16663, g1,c19342, g1,c26955, g1
GO:0000155	phosphorelay sensor kinase activity	molecular function	1	2	291	36	21672	c25731, g1,c21163, g1
GO:0051246	regulation of protein metabolic process	biological process	1	9	291	414	21672	c11792, g1,c19812, g2,c24876, g1,c22308, g1,c22643, g1,c21198, g1,c25889, g1,c23930, g1,c22053, g1
GO:0006573	valine metabolic process	biological process	1	4	291	119	21672	c21880, g1,c25016, g1,c23400, g1,c22122, g1
GO:0051707	response to other organism	biological process	1	4	291	94	21672	c25824, g1,c18303, g1,c22943, g1,c21869, g1
GO:0044106	cellular amine metabolic process	biological process	1	7	291	243	21672	c25253, g2,c25253, g1,c20055, g1,c21880, g1,c24705, g1,c25016, g1,c24705, g3
GO:0006939	smooth muscle contraction	biological process	1	1	291	3	21672	c23763, g1
GO:0006940	regulation of smooth muscle contraction	biological process	1	1	291	3	21672	c23763, g1
GO:0006549	isoleucine metabolic process	biological process	1	4	291	121	21672	c23400, g1,c25016, g1,c22122, g1,c21880, g1
GO:0006276	plasmid maintenance	biological process	1	1	291	5	21672	c21098, g1
GO:0016810	hydrolase activity, acting on carbon-nitrogen (but not peptide) bonds	molecular function	1	4	291	109	21672	c21114, g1,c22471, g1,c19517, g1,c31549, g1
GO:0022900	electron transport chain	biological process	1	7	291	320	21672	c31140, g1,c25375, g1,c17572, g1,c44009, g1,c42901, g1,c47020, g1,c31181, g1
GO:0006550	isoleucine catabolic process	biological process	1	3	291	75	21672	c25016, g1,c23400, g1,c21880, g1
GO:0006552	leucine catabolic process	biological process	1	3	291	75	21672	c21880, g1,c25016, g1,c23400, g1
GO:0006574	valine catabolic process	biological process	1	3	291	75	21672	c21880, g1,c25016, g1,c23400, g1
GO:0009083	branched-chain amino acid catabolic process	biological process	1	3	291	75	21672	c21880, g1,c25016, g1,c23400, g1
GO:0003848	2-amino-4-hydroxy-6-hydroxymethyldihydropteridine diphosphokinase activity	molecular function	1	1	291	3	21672	c25838, g1
GO:0050790	regulation of catalytic activity	biological process	1	8	291	255	21672	c22053, g1,c21198, g1,c23930, g1,c24876, g1,c22308, g1,c25783, g1,c25731, g1,c24684, g1
GO:0019220	regulation of phosphate metabolic process	biological process	1	7	291	204	21672	c21198, g1,c24684, g1,c25731, g1,c23930, g1,c24876, g1,c22053, g1,c22308, g1
GO:0051174	regulation of phosphorus metabolic process	biological process	1	7	291	204	21672	c24684, g1,c25731, g1,c23930, g1,c21198, g1,c22308, g1,c24876, g1,c22053, g1
GO:0019899	enzyme binding	molecular function	1	5	291	119	21672	c24876, g1,c22053, g1,c22308, g1,c21198, g1,c23930, g1
GO:0009308	amine metabolic process	biological process	1	7	291	256	21672	c24705, g3,c25016, g1,c24705, g1,c21880, g1,c25253, g2,c20055, g1,c25253, g1
GO:0004089	carbonate dehydratase activity	molecular function	1	1	291	8	21672	c17400, g1
GO:0016841	ammonia-lyase activity	molecular function	1	1	291	5	21672	c25356, g1
GO:0044391	ribosomal subunit	cellular component	1	4	291	170	21672	c22170, g3,c19993, g1,c22416, g4,c20180, g2
GO:0044111	development involved in symbiotic interaction	biological process	1	2	291	32	21672	c26955, g1,c16663, g1
GO:0004161	dimethylallyltranstransferase activity	molecular function	1	1	291	4	21672	c23018, g1
GO:0016614	oxidoreductase activity, acting on CH-OH group of donors	molecular function	1	9	291	396	21672	c25365, g1,c22006, g1,c21880, g1,c25016, g1,c20511, g1,c24608, g1,c22737, g1,c22122, g1,c22808, g1
GO:0004329	formate-tetrahydrofolate ligase activity	molecular function	1	1	291	5	21672	c25838, g1
GO:0075519	microtubule-dependent intracellular transport of viral material	biological process	1	1	291	9	21672	c21879, g1
GO:0075521	microtubule-dependent intracellular transport of viral material to nucleus	biological process	1	1	291	9	21672	c21879, g1
GO:0075606	transport of viral material to nucleus	biological process	1	1	291	9	21672	c21879, g1
GO:0006548	histidine catabolic process	biological process	1	1	291	5	21672	c25356, g1
GO:0052805	imidazole-containing compound catabolic process	biological process	1	1	291	5	21672	c25356, g1
GO:0006551	leucine metabolic process	biological process	1	4	291	124	21672	c21880, g1,c22122, g1,c25016, g1,c23400, g1
GO:0016805	dipeptidase activity	molecular function	1	1	291	7	21672	c22571, g2
GO:0044766	multi-organism transport	biological process	1	1	291	10	21672	c21879, g1
GO:0075733	intracellular transport of viral material	biological process	1	1	291	10	21672	c21879, g1
GO:0005664	nuclear origin of replication recognition complex	cellular component	1	1	291	9	21672	c10710, g1
GO:0019646	aerobic electron transport chain	biological process	1	1	291	7	21672	c44009, g1
GO:0051704	multi-organism process	biological process	1	20	291	879	21672	c22943, g1,c21721, g1,c23956, g1,c18303, g1,c26451, g1,c23089, g3,c21869, g1,c18669, g1,c20952, g1,c26955, g1,c25824, g1,c22168, g1,c18353, g1,c22893, g1,c25880, g2,c23934, g3,c26939, g1,c21879, g1,c16663, g1,c23468, g1
GO:0065009	regulation of molecular function	biological process	1	8	291	263	21672	c25783, g1,c24684, g1,c25731, g1,c24876, g1,c22308, g1,c21198, g1,c23930, g1,c22053, g1
GO:0005975	carbohydrate metabolic process	biological process	1	27	291	1462	21672	c21583, g1,c23556, g1,c22122, g1,c24608, g1,c26628, g1,c21114, g1,c17336, g1,c23984, g1,c23005, g1,c25361, g1,c20495, g1,c21720, g1,c25950, g1,c21979, g1,c25409, g1,c17599, g1,c24621, g1,c24177, g1,c11792, g1,c23934, g3,c23639, g2,c31549, g1,c20511, g1,c23751, g1,c25710, g1,c20522, g1,c22471, g1
GO:0006952	defense response	biological process	1	5	291	164	21672	c21869, g1,c22063, g2,c22943, g1,c18303, g1,c25824, g1
GO:0017080	sodium channel regulator activity	molecular function	1	1	291	8	21672	c21721, g1
GO:0019871	sodium channel inhibitor activity	molecular function	1	1	291	8	21672	c21721, g1
GO:0006611	protein export from nucleus	biological process	1	1	291	7	21672	c27060, g1
GO:0006998	nuclear envelope organization	biological process	1	1	291	7	21672	c27060, g1
GO:0016646	oxidoreductase activity, acting on the CH-NH group of donors, NAD or NADP as acceptor	molecular function	1	2	291	32	21672	c25838, g1,c25016, g1
GO:0043385	mycotoxin metabolic process	biological process	1	1	291	8	21672	c23856, g1
GO:0043386	mycotoxin biosynthetic process	biological process	1	1	291	8	21672	c23856, g1
GO:0045122	aflatoxin biosynthetic process	biological process	1	1	291	8	21672	c23856, g1
GO:0046222	aflatoxin metabolic process	biological process	1	1	291	8	21672	c23856, g1
GO:1901376	organic heteropentacyclic compound metabolic process	biological process	1	1	291	8	21672	c23856, g1
GO:1901378	organic heteropentacyclic compound biosynthetic process	biological process	1	1	291	8	21672	c23856, g1
GO:0030260	entry into host cell	biological process	1	2	291	36	21672	c21879, g1,c22168, g1
GO:0044409	entry into host	biological process	1	2	291	36	21672	c21879, g1,c22168, g1
GO:0046718	viral entry into host cell	biological process	1	2	291	36	21672	c22168, g1,c21879, g1
GO:0051806	entry into cell of other organism involved in symbiotic interaction	biological process	1	2	291	36	21672	c21879, g1,c22168, g1
GO:0051828	entry into other organism involved in symbiotic interaction	biological process	1	2	291	36	21672	c22168, g1,c21879, g1
GO:0030193	regulation of blood coagulation	biological process	1	1	291	8	21672	c22456, g1
GO:0050818	regulation of coagulation	biological process	1	1	291	8	21672	c22456, g1
GO:0061041	regulation of wound healing	biological process	1	1	291	8	21672	c22456, g1
GO:1900046	regulation of hemostasis	biological process	1	1	291	8	21672	c22456, g1
GO:0022627	cytosolic small ribosomal subunit	cellular component	1	1	291	9	21672	c22416, g4
GO:0051015	actin filament binding	molecular function	1	1	291	8	21672	c20100, g1
GO:0009081	branched-chain amino acid metabolic process	biological process	1	4	291	131	21672	c21880, g1,c25016, g1,c23400, g1,c22122, g1
GO:0050660	flavin adenine dinucleotide binding	molecular function	1	6	291	230	21672	c23942, g1,c21604, g1,c22936, g1,c23637, g1,c25365, g1,c23301, g1
GO:0016616	oxidoreductase activity, acting on the CH-OH group of donors, NAD or NADP as acceptor	molecular function	1	8	291	335	21672	c22808, g1,c22122, g1,c22737, g1,c24608, g1,c25016, g1,c20511, g1,c21880, g1,c22006, g1
GO:0042555	MCM complex	cellular component	1	1	291	5	21672	c25925, g1
GO:0016560	protein import into peroxisome matrix, docking	biological process	1	1	291	6	21672	c21343, g1
GO:0001871	pattern binding	molecular function	1	2	291	44	21672	c23934, g3,c21979, g1
GO:0030247	polysaccharide binding	molecular function	1	2	291	44	21672	c23934, g3,c21979, g1
GO:0007031	peroxisome organization	biological process	1	2	291	32	21672	c20317, g1,c21343, g1
GO:0004360	glutamine-fructose-6-phosphate transaminase (isomerizing) activity	molecular function	1	1	291	4	21672	c24177, g1
GO:0070548	L-glutamine aminotransferase activity	molecular function	1	1	291	4	21672	c24177, g1
GO:0004421	hydroxymethylglutaryl-CoA synthase activity	molecular function	1	1	291	7	21672	c23400, g1
GO:0016627	oxidoreductase activity, acting on the CH-CH group of donors	molecular function	1	6	291	218	21672	c22883, g1,c23942, g1,c23637, g1,c21604, g1,c24608, g1,c21769, g1
GO:0019835	cytolysis	biological process	1	1	291	5	21672	c23468, g1
GO:0016558	protein import into peroxisome matrix	biological process	1	1	291	7	21672	c21343, g1
GO:0048037	cofactor binding	molecular function	1	15	291	821	21672	c22122, g1,c22813, g1,c24608, g1,c23704, g1,c23942, g1,c20511, g1,c23602, g2,c23637, g1,c25365, g1,c23956, g1,c23301, g1,c22006, g1,c21604, g1,c23572, g1,c22936, g1
GO:0006937	regulation of muscle contraction	biological process	1	1	291	5	21672	c23763, g1
GO:0090257	regulation of muscle system process	biological process	1	1	291	5	21672	c23763, g1
GO:0004363	glutathione synthase activity	molecular function	1	1	291	4	21672	c25467, g1
GO:0006002	fructose 6-phosphate metabolic process	biological process	1	1	291	8	21672	c25710, g1
GO:0004365	glyceraldehyde-3-phosphate dehydrogenase (NAD+) (phosphorylating) activity	molecular function	1	1	291	10	21672	c24608, g1
GO:0015934	large ribosomal subunit	cellular component	1	2	291	72	21672	c20180, g2,c19993, g1
GO:1901565	organonitrogen compound catabolic process	biological process	1	13	291	636	21672	c24684, g1,c25731, g1,c24705, g1,c15972, g1,c25925, g1,c24634, g2,c21840, g1,c23400, g1,c25889, g1,c21880, g1,c25356, g1,c23404, g1,c25016, g1
GO:0006040	amino sugar metabolic process	biological process	1	3	291	102	21672	c24177, g1,c23993, g1,c24634, g2
GO:0004612	phosphoenolpyruvate carboxykinase (ATP) activity	molecular function	1	1	291	11	21672	c23751, g1
GO:0006113	fermentation	biological process	1	1	291	10	21672	c22737, g1
GO:0003958	NADPH-hemoprotein reductase activity	molecular function	1	1	291	13	21672	c23572, g1
GO:0031012	extracellular matrix	cellular component	1	6	291	180	21672	c19629, g1,c20118, g1,c18256, g1,c22168, g1,c24062, g1,c22933, g1
GO:0046417	chorismate metabolic process	biological process	1	1	291	12	21672	c16769, g1
GO:0003872	6-phosphofructokinase activity	molecular function	1	1	291	10	21672	c25710, g1
GO:0005945	6-phosphofructokinase complex	cellular component	1	1	291	10	21672	c25710, g1
GO:0004526	ribonuclease P activity	molecular function	1	1	291	6	21672	c21769, g1
GO:0042744	hydrogen peroxide catabolic process	biological process	1	1	291	9	21672	c25253, g2
GO:0004109	coproporphyrinogen oxidase activity	molecular function	1	1	291	11	21672	c21769, g1
GO:0008483	transaminase activity	molecular function	1	2	291	52	21672	c24177, g1,c23405, g1
GO:0042743	hydrogen peroxide metabolic process	biological process	1	1	291	10	21672	c25253, g2
GO:0006152	purine nucleoside catabolic process	biological process	1	8	291	352	21672	c23404, g1,c25889, g1,c21840, g1,c24705, g1,c25731, g1,c15972, g1,c24684, g1,c25925, g1
GO:0009143	nucleoside triphosphate catabolic process	biological process	1	8	291	352	21672	c21840, g1,c25925, g1,c24684, g1,c15972, g1,c25731, g1,c24705, g1,c23404, g1,c25889, g1
GO:0009146	purine nucleoside triphosphate catabolic process	biological process	1	8	291	352	21672	c23404, g1,c25889, g1,c21840, g1,c25925, g1,c24705, g1,c25731, g1,c15972, g1,c24684, g1
GO:0009203	ribonucleoside triphosphate catabolic process	biological process	1	8	291	352	21672	c24684, g1,c25731, g1,c24705, g1,c15972, g1,c25925, g1,c21840, g1,c25889, g1,c23404, g1
GO:0009207	purine ribonucleoside triphosphate catabolic process	biological process	1	8	291	352	21672	c25889, g1,c23404, g1,c25925, g1,c24684, g1,c25731, g1,c24705, g1,c15972, g1,c21840, g1
GO:0046130	purine ribonucleoside catabolic process	biological process	1	8	291	352	21672	c23404, g1,c25889, g1,c21840, g1,c24705, g1,c25731, g1,c15972, g1,c24684, g1,c25925, g1
GO:0034614	cellular response to reactive oxygen species	biological process	1	1	291	10	21672	c25253, g2
GO:0070301	cellular response to hydrogen peroxide	biological process	1	1	291	10	21672	c25253, g2
GO:0042454	ribonucleoside catabolic process	biological process	1	8	291	353	21672	c21840, g1,c25925, g1,c15972, g1,c25731, g1,c24705, g1,c24684, g1,c23404, g1,c25889, g1
GO:0005201	extracellular matrix structural constituent	molecular function	1	1	291	5	21672	c22168, g1
GO:0009164	nucleoside catabolic process	biological process	1	8	291	354	21672	c21840, g1,c25925, g1,c24705, g1,c25731, g1,c15972, g1,c24684, g1,c23404, g1,c25889, g1
GO:1901658	glycosyl compound catabolic process	biological process	1	8	291	354	21672	c21840, g1,c24684, g1,c15972, g1,c25731, g1,c24705, g1,c25925, g1,c23404, g1,c25889, g1
GO:0009154	purine ribonucleotide catabolic process	biological process	1	8	291	353	21672	c21840, g1,c25925, g1,c24684, g1,c25731, g1,c24705, g1,c15972, g1,c23404, g1,c25889, g1
GO:0009261	ribonucleotide catabolic process	biological process	1	8	291	353	21672	c23404, g1,c25889, g1,c21840, g1,c24684, g1,c25731, g1,c24705, g1,c15972, g1,c25925, g1
GO:0005344	oxygen transporter activity	molecular function	1	1	291	14	21672	c24150, g1
GO:0004497	monooxygenase activity	molecular function	1	3	291	95	21672	c23301, g1,c22643, g1,c22168, g1
GO:0042542	response to hydrogen peroxide	biological process	1	1	291	11	21672	c25253, g2
GO:0009877	nodulation	biological process	1	2	291	41	21672	c16663, g1,c26955, g1
GO:0004506	squalene monooxygenase activity	molecular function	1	1	291	9	21672	c23301, g1
GO:0006568	tryptophan metabolic process	biological process	1	4	291	146	21672	c21880, g1,c25253, g2,c25253, g1,c25016, g1
GO:0006586	indolalkylamine metabolic process	biological process	1	4	291	146	21672	c25016, g1,c21880, g1,c25253, g1,c25253, g2
GO:0008233	peptidase activity	molecular function	1	20	291	1023	21672	c21896, g1,c1992, g1,c23406, g1,c25090, g1,c1974, g1,c15288, g1,c24062, g1,c13329, g1,c2648, g1,c23357, g1,c22571, g2,c25528, g1,c19549, g1,c21865, g1,c39017, g1,c25783, g1,c26623, g1,c22001, g1,c22565, g1,c6643, g1
GO:0003942	N-acetyl-gamma-glutamyl-phosphate reductase activity	molecular function	1	1	291	10	21672	c25889, g1
GO:0006030	chitin metabolic process	biological process	1	2	291	52	21672	c23993, g1,c24634, g2
GO:0008544	epidermis development	biological process	1	1	291	8	21672	c21840, g1
GO:0043588	skin development	biological process	1	1	291	8	21672	c21840, g1
GO:0016769	transferase activity, transferring nitrogenous groups	molecular function	1	2	291	54	21672	c24177, g1,c23405, g1
GO:0009245	lipid A biosynthetic process	biological process	1	1	291	10	21672	c31549, g1
GO:0046493	lipid A metabolic process	biological process	1	1	291	10	21672	c31549, g1
GO:1901269	lipooligosaccharide metabolic process	biological process	1	1	291	10	21672	c31549, g1
GO:1901271	lipooligosaccharide biosynthetic process	biological process	1	1	291	10	21672	c31549, g1
GO:0006195	purine nucleotide catabolic process	biological process	1	8	291	362	21672	c21840, g1,c25925, g1,c24684, g1,c15972, g1,c25731, g1,c24705, g1,c23404, g1,c25889, g1
GO:0072523	purine-containing compound catabolic process	biological process	1	8	291	364	21672	c23404, g1,c25889, g1,c21840, g1,c24684, g1,c25731, g1,c24705, g1,c15972, g1,c25925, g1
GO:0045297	post-mating behavior	biological process	1	1	291	12	21672	c23089, g3
GO:0045924	regulation of female receptivity	biological process	1	1	291	12	21672	c23089, g3
GO:0046008	regulation of female receptivity, post-mating	biological process	1	1	291	12	21672	c23089, g3
GO:0060180	female mating behavior	biological process	1	1	291	12	21672	c23089, g3
GO:0000302	response to reactive oxygen species	biological process	1	1	291	13	21672	c25253, g2
GO:1901071	glucosamine-containing compound metabolic process	biological process	1	2	291	57	21672	c23993, g1,c24634, g2
GO:0016645	oxidoreductase activity, acting on the CH-NH group of donors	molecular function	1	2	291	45	21672	c25838, g1,c25016, g1
GO:0016653	oxidoreductase activity, acting on NAD(P)H, heme protein as acceptor	molecular function	1	1	291	16	21672	c23572, g1
GO:0005743	mitochondrial inner membrane	cellular component	1	6	291	286	21672	c42901, g1,c24634, g1,c47020, g1,c31140, g1,c24634, g2,c17572, g1
GO:0009166	nucleotide catabolic process	biological process	1	8	291	365	21672	c25925, g1,c25731, g1,c15972, g1,c24705, g1,c24684, g1,c21840, g1,c25889, g1,c23404, g1
GO:1901292	nucleoside phosphate catabolic process	biological process	1	8	291	365	21672	c21840, g1,c24684, g1,c15972, g1,c25731, g1,c24705, g1,c25925, g1,c23404, g1,c25889, g1
GO:1901136	carbohydrate derivative catabolic process	biological process	1	9	291	422	21672	c25889, g1,c23404, g1,c25925, g1,c24684, g1,c15972, g1,c25731, g1,c24705, g1,c24634, g2,c21840, g1
GO:0042967	acyl-carrier-protein biosynthetic process	biological process	1	4	291	139	21672	c21838, g1,c26197, g1,c21108, g1,c23400, g1
GO:0006184	GTP catabolic process	biological process	1	7	291	283	21672	c25889, g1,c24684, g1,c25731, g1,c15972, g1,c24705, g1,c23404, g1,c21840, g1
GO:1901069	guanosine-containing compound catabolic process	biological process	1	7	291	283	21672	c23404, g1,c21840, g1,c15972, g1,c25731, g1,c24705, g1,c24684, g1,c25889, g1
GO:0006452	translational frameshifting	biological process	1	1	291	19	21672	c19812, g2
GO:0006542	glutamine biosynthetic process	biological process	1	1	291	8	21672	c20300, g1
GO:0006750	glutathione biosynthetic process	biological process	1	1	291	7	21672	c25467, g1
GO:0019184	nonribosomal peptide biosynthetic process	biological process	1	1	291	7	21672	c25467, g1
GO:0006414	translational elongation	biological process	1	4	291	197	21672	c17117, g1,c19812, g2,c23152, g1,c25889, g1
GO:0003857	3-hydroxyacyl-CoA dehydrogenase activity	molecular function	1	2	291	48	21672	c21880, g1,c25016, g1
GO:0004673	protein histidine kinase activity	molecular function	1	2	291	48	21672	c25731, g1,c21163, g1
GO:0009365	protein histidine kinase complex	cellular component	1	2	291	48	21672	c21163, g1,c25731, g1
GO:0030120	vesicle coat	cellular component	1	2	291	53	21672	c17485, g1,c21838, g1
GO:0003924	GTPase activity	molecular function	1	11	291	497	21672	c25925, g1,c20055, g1,c15972, g1,c26330, g1,c25880, g2,c24705, g1,c23406, g1,c21840, g1,c24705, g3,c25889, g1,c23404, g1
GO:0009200	deoxyribonucleoside triphosphate metabolic process	biological process	1	1	291	9	21672	c19566, g4
GO:0009211	pyrimidine deoxyribonucleoside triphosphate metabolic process	biological process	1	1	291	9	21672	c19566, g4
GO:0046080	dUTP metabolic process	biological process	1	1	291	9	21672	c19566, g4
GO:0046950	cellular ketone body metabolic process	biological process	1	1	291	12	21672	c23400, g1
GO:0032101	regulation of response to external stimulus	biological process	1	1	291	13	21672	c22456, g1
GO:0008238	exopeptidase activity	molecular function	1	4	291	151	21672	c22571, g2,c22565, g1,c23406, g1,c22001, g1
GO:0097367	carbohydrate derivative binding	molecular function	1	2	291	41	21672	c17785, g1,c23993, g1
GO:0042430	indole-containing compound metabolic process	biological process	1	4	291	152	21672	c25016, g1,c21880, g1,c25253, g1,c25253, g2
GO:0003012	muscle system process	biological process	1	1	291	9	21672	c23763, g1
GO:0006936	muscle contraction	biological process	1	1	291	9	21672	c23763, g1
GO:0006979	response to oxidative stress	biological process	1	3	291	91	21672	c25253, g1,c25253, g2,c23171, g1
GO:1901701	cellular response to oxygen-containing compound	biological process	1	1	291	14	21672	c25253, g2
GO:0042398	cellular modified amino acid biosynthetic process	biological process	1	5	291	190	21672	c22122, g1,c25016, g1,c22258, g1,c25467, g1,c25838, g1
GO:0070011	peptidase activity, acting on L-amino acid peptides	molecular function	1	18	291	926	21672	c25090, g1,c23406, g1,c1974, g1,c15288, g1,c21896, g1,c1992, g1,c25783, g1,c26623, g1,c21865, g1,c39017, g1,c22565, g1,c6643, g1,c22001, g1,c2648, g1,c23357, g1,c13329, g1,c22571, g2,c25528, g1
GO:0019213	deacetylase activity	molecular function	1	1	291	11	21672	c31549, g1
GO:0016559	peroxisome fission	biological process	1	1	291	12	21672	c20317, g1
GO:0015980	energy derivation by oxidation of organic compounds	biological process	1	9	291	529	21672	c17572, g1,c31181, g1,c47020, g1,c23751, g1,c22737, g1,c25375, g1,c31140, g1,c44009, g1,c42901, g1
GO:0004549	tRNA-specific ribonuclease activity	molecular function	1	1	291	8	21672	c21769, g1
GO:0008033	tRNA processing	biological process	1	6	291	193	21672	c23301, g1,c23637, g1,c23018, g1,c22936, g1,c21769, g1,c23405, g1
GO:0000051	urea cycle intermediate metabolic process	biological process	1	1	291	11	21672	c25889, g1
GO:0006997	nucleus organization	biological process	1	1	291	16	21672	c27060, g1
GO:0030111	regulation of Wnt receptor signaling pathway	biological process	1	1	291	14	21672	c24337, g1
GO:0030178	negative regulation of Wnt receptor signaling pathway	biological process	1	1	291	14	21672	c24337, g1
GO:0000808	origin recognition complex	cellular component	1	1	291	14	21672	c10710, g1
GO:0043243	positive regulation of protein complex disassembly	biological process	1	1	291	21	21672	c19812, g2
GO:0045905	positive regulation of translational termination	biological process	1	1	291	21	21672	c19812, g2
GO:0004618	phosphoglycerate kinase activity	molecular function	1	1	291	15	21672	c23005, g1
GO:0015099	nickel cation transmembrane transporter activity	molecular function	1	1	291	7	21672	c21865, g1
GO:0015675	nickel cation transport	biological process	1	1	291	7	21672	c21865, g1
GO:0009403	toxin biosynthetic process	biological process	1	1	291	13	21672	c23856, g1
GO:0004348	glucosylceramidase activity	molecular function	1	1	291	10	21672	c11792, g1
GO:0006094	gluconeogenesis	biological process	1	4	291	211	21672	c24608, g1,c23751, g1,c25710, g1,c23005, g1
GO:0040002	collagen and cuticulin-based cuticle development	biological process	1	1	291	8	21672	c21840, g1
GO:0009060	aerobic respiration	biological process	1	4	291	209	21672	c23751, g1,c47020, g1,c42901, g1,c44009, g1
GO:0008201	heparin binding	molecular function	1	1	291	8	21672	c17785, g1
GO:0005834	heterotrimeric G-protein complex	cellular component	1	1	291	11	21672	c23993, g1
GO:0031234	extrinsic to internal side of plasma membrane	cellular component	1	1	291	11	21672	c23993, g1
GO:0019866	organelle inner membrane	cellular component	1	6	291	301	21672	c47020, g1,c24634, g1,c42901, g1,c17572, g1,c24634, g2,c31140, g1
GO:0004784	superoxide dismutase activity	molecular function	1	1	291	22	21672	c22288, g1
GO:0016721	oxidoreductase activity, acting on superoxide radicals as acceptor	molecular function	1	1	291	22	21672	c22288, g1
GO:0006625	protein targeting to peroxisome	biological process	1	1	291	12	21672	c21343, g1
GO:0043574	peroxisomal transport	biological process	1	1	291	12	21672	c21343, g1
GO:0072662	protein localization to peroxisome	biological process	1	1	291	12	21672	c21343, g1
GO:0072663	establishment of protein localization to peroxisome	biological process	1	1	291	12	21672	c21343, g1
GO:0030662	coated vesicle membrane	cellular component	1	2	291	57	21672	c17485, g1,c21838, g1
GO:0010171	body morphogenesis	biological process	1	2	291	56	21672	c23989, g1,c19342, g1
GO:0005539	glycosaminoglycan binding	molecular function	1	1	291	9	21672	c17785, g1
GO:0016775	phosphotransferase activity, nitrogenous group as acceptor	molecular function	1	2	291	56	21672	c25731, g1,c21163, g1
GO:0008601	protein phosphatase type 2A regulator activity	molecular function	1	1	291	12	21672	c21421, g1
GO:0019319	hexose biosynthetic process	biological process	1	4	291	217	21672	c23005, g1,c23751, g1,c25710, g1,c24608, g1
GO:0046364	monosaccharide biosynthetic process	biological process	1	4	291	217	21672	c23005, g1,c24608, g1,c23751, g1,c25710, g1
GO:0004568	chitinase activity	molecular function	1	1	291	12	21672	c24634, g2
GO:0006032	chitin catabolic process	biological process	1	1	291	12	21672	c24634, g2
GO:0046348	amino sugar catabolic process	biological process	1	1	291	12	21672	c24634, g2
GO:1901072	glucosamine-containing compound catabolic process	biological process	1	1	291	12	21672	c24634, g2
GO:0045901	positive regulation of translational elongation	biological process	1	1	291	24	21672	c19812, g2
GO:0000159	protein phosphatase type 2A complex	cellular component	1	1	291	13	21672	c21421, g1
GO:0045333	cellular respiration	biological process	1	8	291	493	21672	c42901, g1,c44009, g1,c25375, g1,c31140, g1,c47020, g1,c31181, g1,c23751, g1,c17572, g1
GO:0044781	bacterial-type flagellum organization	biological process	1	1	291	14	21672	c26628, g1
GO:0044057	regulation of system process	biological process	1	1	291	12	21672	c23763, g1
GO:0043043	peptide biosynthetic process	biological process	1	1	291	11	21672	c25467, g1
GO:0030677	ribonuclease P complex	cellular component	1	1	291	9	21672	c21769, g1
GO:0005213	structural constituent of chorion	molecular function	1	1	291	19	21672	c17117, g1
GO:0007304	chorion-containing eggshell formation	biological process	1	1	291	19	21672	c17117, g1
GO:0030707	ovarian follicle cell development	biological process	1	1	291	19	21672	c17117, g1
GO:0030126	COPI vesicle coat	cellular component	1	1	291	14	21672	c17485, g1
GO:0030137	COPI-coated vesicle	cellular component	1	1	291	14	21672	c17485, g1
GO:0030663	COPI-coated vesicle membrane	cellular component	1	1	291	14	21672	c17485, g1
GO:0008287	protein serine/threonine phosphatase complex	cellular component	1	1	291	15	21672	c21421, g1
GO:0006508	proteolysis	biological process	1	18	291	973	21672	c20522, g1,c1992, g1,c23406, g1,c1974, g1,c15288, g1,c24062, g1,c22571, g2,c25528, g1,c2648, g1,c23357, g1,c13329, g1,c6643, g1,c22565, g1,c22001, g1,c25783, g1,c26623, g1,c21865, g1,c39017, g1
GO:0009396	folic acid-containing compound biosynthetic process	biological process	1	2	291	57	21672	c25838, g1,c25016, g1
GO:0003989	acetyl-CoA carboxylase activity	molecular function	1	1	291	23	21672	c22167, g1
GO:0016421	CoA carboxylase activity	molecular function	1	1	291	23	21672	c22167, g1
GO:0045727	positive regulation of translation	biological process	1	1	291	26	21672	c19812, g2
GO:0005777	peroxisome	cellular component	1	2	291	50	21672	c20317, g1,c21343, g1
GO:0042579	microbody	cellular component	1	2	291	50	21672	c20317, g1,c21343, g1
GO:0008839	4-hydroxy-tetrahydrodipicolinate reductase	molecular function	1	1	291	17	21672	c24608, g1
GO:0009089	lysine biosynthetic process via diaminopimelate	biological process	1	1	291	17	21672	c24608, g1
GO:0046451	diaminopimelate metabolic process	biological process	1	1	291	17	21672	c24608, g1
GO:0004867	serine-type endopeptidase inhibitor activity	molecular function	1	2	291	60	21672	c38878, g1,c21006, g1
GO:0019087	transformation of host cell by virus	biological process	1	2	291	33	21672	c18353, g1,c20952, g1
GO:0016747	transferase activity, transferring acyl groups other than amino-acyl groups	molecular function	1	5	291	220	21672	c20952, g1,c26197, g1,c21838, g1,c23400, g1,c21108, g1
GO:0016639	oxidoreductase activity, acting on the CH-NH2 group of donors, NAD or NADP as acceptor	molecular function	1	1	291	20	21672	c24852, g1
GO:0008652	cellular amino acid biosynthetic process	biological process	1	8	291	411	21672	c25016, g1,c20300, g1,c25889, g1,c22258, g1,c25467, g1,c22122, g1,c25838, g1,c24608, g1
GO:0004356	glutamate-ammonia ligase activity	molecular function	1	1	291	17	21672	c20300, g1
GO:0016211	ammonia ligase activity	molecular function	1	1	291	17	21672	c20300, g1
GO:0016880	acid-ammonia (or amide) ligase activity	molecular function	1	1	291	17	21672	c20300, g1
GO:0006022	aminoglycan metabolic process	biological process	1	3	291	117	21672	c24634, g2,c20300, g1,c23993, g1
GO:0044270	cellular nitrogen compound catabolic process	biological process	1	10	291	503	21672	c23404, g1,c25356, g1,c25889, g1,c21840, g1,c24773, g1,c25925, g1,c24684, g1,c15972, g1,c25731, g1,c24705, g1
GO:0004180	carboxypeptidase activity	molecular function	1	2	291	62	21672	c22001, g1,c22565, g1
GO:0080134	regulation of response to stress	biological process	1	1	291	21	21672	c22456, g1
GO:0006220	pyrimidine nucleotide metabolic process	biological process	1	2	291	58	21672	c19566, g4,c22416, g4
GO:0016742	hydroxymethyl-, formyl- and related transferase activity	molecular function	1	1	291	18	21672	c25941, g1
GO:0046487	glyoxylate metabolic process	biological process	1	2	291	71	21672	c25016, g1,c25838, g1
GO:0051701	interaction with host	biological process	1	5	291	171	21672	c26939, g1,c21879, g1,c20952, g1,c22168, g1,c18353, g1
GO:0046700	heterocycle catabolic process	biological process	1	10	291	505	21672	c23404, g1,c25889, g1,c25356, g1,c21840, g1,c24684, g1,c25731, g1,c24705, g1,c15972, g1,c24773, g1,c25925, g1
GO:0052126	movement in host environment	biological process	1	2	291	53	21672	c21879, g1,c22168, g1
GO:0052192	movement in environment of other organism involved in symbiotic interaction	biological process	1	2	291	53	21672	c22168, g1,c21879, g1
GO:0015669	gas transport	biological process	1	1	291	25	21672	c24150, g1
GO:0015671	oxygen transport	biological process	1	1	291	25	21672	c24150, g1
GO:0001897	cytolysis by symbiont of host cells	biological process	1	1	291	10	21672	c26939, g1
GO:0019836	hemolysis by symbiont of host erythrocytes	biological process	1	1	291	10	21672	c26939, g1
GO:0016840	carbon-nitrogen lyase activity	molecular function	1	1	291	15	21672	c25356, g1
GO:0006694	steroid biosynthetic process	biological process	1	3	291	96	21672	c23301, g1,c23018, g1,c22006, g1
GO:0042559	pteridine-containing compound biosynthetic process	biological process	1	2	291	59	21672	c25016, g1,c25838, g1
GO:0016717	oxidoreductase activity, acting on paired donors, with oxidation of a pair of donors resulting in the reduction of molecular oxygen to two molecules of water	molecular function	1	1	291	17	21672	c22816, g1
GO:0006824	cobalt ion transport	biological process	1	1	291	12	21672	c21865, g1
GO:0015087	cobalt ion transmembrane transporter activity	molecular function	1	1	291	12	21672	c21865, g1
GO:0004478	methionine adenosyltransferase activity	molecular function	1	1	291	24	21672	c22258, g1
GO:0006556	S-adenosylmethionine biosynthetic process	biological process	1	1	291	24	21672	c22258, g1
GO:0009898	internal side of plasma membrane	cellular component	1	1	291	15	21672	c23993, g1
GO:0015947	methane metabolic process	biological process	1	2	291	61	21672	c25253, g2,c25253, g1
GO:0043446	cellular alkane metabolic process	biological process	1	2	291	61	21672	c25253, g2,c25253, g1
GO:0006081	cellular aldehyde metabolic process	biological process	1	2	291	74	21672	c25838, g1,c25016, g1
GO:0012506	vesicle membrane	cellular component	1	2	291	64	21672	c17485, g1,c21838, g1
GO:0030659	cytoplasmic vesicle membrane	cellular component	1	2	291	64	21672	c17485, g1,c21838, g1
GO:0006006	glucose metabolic process	biological process	1	5	291	301	21672	c23005, g1,c22122, g1,c24608, g1,c23751, g1,c25710, g1
GO:0042335	cuticle development	biological process	1	1	291	10	21672	c21840, g1
GO:0044003	modification by symbiont of host morphology or physiology	biological process	1	3	291	73	21672	c18353, g1,c20952, g1,c26939, g1
GO:0008202	steroid metabolic process	biological process	1	3	291	99	21672	c22006, g1,c23018, g1,c23301, g1
GO:0030703	eggshell formation	biological process	1	1	291	21	21672	c17117, g1
GO:0046039	GTP metabolic process	biological process	1	7	291	321	21672	c25731, g1,c24705, g1,c15972, g1,c25889, g1,c24684, g1,c21840, g1,c23404, g1
GO:0016634	oxidoreductase activity, acting on the CH-CH group of donors, oxygen as acceptor	molecular function	1	1	291	19	21672	c21769, g1
GO:0030135	coated vesicle	cellular component	1	2	291	61	21672	c21838, g1,c17485, g1
GO:0007617	mating behavior	biological process	1	1	291	17	21672	c23089, g3
GO:1901681	sulfur compound binding	molecular function	1	2	291	56	21672	c17785, g1,c23704, g1
GO:0043022	ribosome binding	molecular function	1	1	291	34	21672	c19812, g2
GO:0022626	cytosolic ribosome	cellular component	1	1	291	33	21672	c22416, g4
GO:0001907	killing by symbiont of host cells	biological process	1	1	291	12	21672	c26939, g1
GO:0044004	disruption by symbiont of host cell	biological process	1	1	291	12	21672	c26939, g1
GO:0034655	nucleobase-containing compound catabolic process	biological process	1	9	291	466	21672	c23404, g1,c25889, g1,c21840, g1,c25925, g1,c24773, g1,c15972, g1,c25731, g1,c24705, g1,c24684, g1
GO:0016885	ligase activity, forming carbon-carbon bonds	molecular function	1	1	291	27	21672	c22167, g1
GO:0003950	NAD+ ADP-ribosyltransferase activity	molecular function	1	1	291	19	21672	c23956, g1
GO:0030151	molybdenum ion binding	molecular function	1	1	291	18	21672	c26451, g1
GO:0018874	benzoate metabolic process	biological process	1	2	291	73	21672	c21880, g1,c25016, g1
GO:0034599	cellular response to oxidative stress	biological process	1	1	291	21	21672	c25253, g2
GO:0019439	aromatic compound catabolic process	biological process	1	10	291	522	21672	c23404, g1,c25356, g1,c25889, g1,c21840, g1,c25925, g1,c24773, g1,c24684, g1,c15972, g1,c25731, g1,c24705, g1
GO:0035821	modification of morphology or physiology of other organism	biological process	1	3	291	77	21672	c26939, g1,c20952, g1,c18353, g1
GO:0051817	modification of morphology or physiology of other organism involved in symbiotic interaction	biological process	1	3	291	77	21672	c18353, g1,c26939, g1,c20952, g1
GO:0019825	oxygen binding	molecular function	1	1	291	31	21672	c24150, g1
GO:0006690	icosanoid metabolic process	biological process	1	1	291	17	21672	c25090, g1
GO:0006691	leukotriene metabolic process	biological process	1	1	291	17	21672	c25090, g1
GO:0033559	unsaturated fatty acid metabolic process	biological process	1	1	291	17	21672	c25090, g1
GO:1901568	fatty acid derivative metabolic process	biological process	1	1	291	17	21672	c25090, g1
GO:0006760	folic acid-containing compound metabolic process	biological process	1	2	291	69	21672	c25838, g1,c25016, g1
GO:0003779	actin binding	molecular function	1	4	291	185	21672	c23030, g1,c22568, g1,c20430, g1,c20100, g1
GO:1901068	guanosine-containing compound metabolic process	biological process	1	7	291	333	21672	c25889, g1,c24684, g1,c15972, g1,c25731, g1,c24705, g1,c21840, g1,c23404, g1
GO:0006406	mRNA export from nucleus	biological process	1	1	291	22	21672	c27060, g1
GO:0007618	mating	biological process	1	1	291	19	21672	c23089, g3
GO:0009219	pyrimidine deoxyribonucleotide metabolic process	biological process	1	1	291	17	21672	c19566, g4
GO:0009394	2'-deoxyribonucleotide metabolic process	biological process	1	1	291	17	21672	c19566, g4
GO:0019692	deoxyribose phosphate metabolic process	biological process	1	1	291	17	21672	c19566, g4
GO:0009405	pathogenesis	biological process	1	5	291	226	21672	c21721, g1,c23934, g3,c18669, g1,c23468, g1,c23956, g1
GO:0051705	multi-organism behavior	biological process	1	1	291	18	21672	c23089, g3
GO:0051920	peroxiredoxin activity	molecular function	1	1	291	22	21672	c23989, g1
GO:0009262	deoxyribonucleotide metabolic process	biological process	1	1	291	18	21672	c19566, g4
GO:0004857	enzyme inhibitor activity	molecular function	1	4	291	182	21672	c38878, g1,c21006, g1,c18898, g2,c17531, g1
GO:1901361	organic cyclic compound catabolic process	biological process	1	10	291	525	21672	c21840, g1,c24773, g1,c25925, g1,c25731, g1,c24705, g1,c15972, g1,c24684, g1,c23404, g1,c25356, g1,c25889, g1
GO:0003735	structural constituent of ribosome	molecular function	1	15	291	1320	21672	c24688, g1,c18074, g1,c22170, g3,c19311, g1,c17117, g1,c21364, g2,c18370, g1,c10710, g1,c22009, g1,c22416, g4,c23152, g1,c20180, g2,c18044, g1,c19993, g1,c21721, g1
GO:0016778	diphosphotransferase activity	molecular function	1	1	291	20	21672	c25838, g1
GO:0044179	hemolysis in other organism	biological process	1	1	291	13	21672	c26939, g1
GO:0051715	cytolysis in other organism	biological process	1	1	291	13	21672	c26939, g1
GO:0051801	cytolysis in other organism involved in symbiotic interaction	biological process	1	1	291	13	21672	c26939, g1
GO:0052331	hemolysis in other organism involved in symbiotic interaction	biological process	1	1	291	13	21672	c26939, g1
GO:0006096	glycolysis	biological process	1	3	291	170	21672	c25710, g1,c24608, g1,c23005, g1
GO:0042558	pteridine-containing compound metabolic process	biological process	1	2	291	72	21672	c25016, g1,c25838, g1
GO:0009891	positive regulation of biosynthetic process	biological process	1	2	291	84	21672	c19812, g2,c18353, g1
GO:0010557	positive regulation of macromolecule biosynthetic process	biological process	1	2	291	84	21672	c19812, g2,c18353, g1
GO:0031328	positive regulation of cellular biosynthetic process	biological process	1	2	291	84	21672	c18353, g1,c19812, g2
GO:0044433	cytoplasmic vesicle part	cellular component	1	2	291	70	21672	c17485, g1,c21838, g1
GO:0006405	RNA export from nucleus	biological process	1	1	291	25	21672	c27060, g1
GO:0008218	bioluminescence	biological process	1	1	291	16	21672	c22883, g1
GO:0016459	myosin complex	cellular component	1	3	291	138	21672	c20100, g1,c39084, g1,c25731, g1
GO:0009317	acetyl-CoA carboxylase complex	cellular component	1	1	291	33	21672	c22167, g1
GO:0043648	dicarboxylic acid metabolic process	biological process	1	4	291	220	21672	c25356, g1,c24608, g1,c25838, g1,c16769, g1
GO:0046872	metal ion binding	molecular function	1	47	291	2871	21672	c31181, g1,c26955, g1,c23942, g1,c39084, g1,c21629, g1,c42901, g1,c17400, g1,c16663, g1,c19631, g1,c25090, g1,c10720, g1,c19517, g1,c23572, g1,c23005, g1,c23370, g1,c19846, g1,c24150, g1,c25528, g1,c25418, g1,c21865, g1,c25059, g1,c24789, g1,c25375, g1,c31140, g1,c22737, g1,c24695, g1,c24337, g1,c25824, g1,c22288, g1,c3262, g1,c21280, g1,c25253, g2,c18353, g1,c18517, g1,c26197, g1,c47020, g1,c218…
GO:0012507	ER to Golgi transport vesicle membrane	cellular component	1	1	291	25	21672	c21838, g1
GO:0030127	COPII vesicle coat	cellular component	1	1	291	25	21672	c21838, g1
GO:0030134	ER to Golgi transport vesicle	cellular component	1	1	291	25	21672	c21838, g1
GO:0016893	endonuclease activity, active with either ribo- or deoxyribonucleic acids and producing 5'-phosphomonoesters	molecular function	1	2	291	62	21672	c21769, g1,c24773, g1
GO:0015935	small ribosomal subunit	cellular component	1	2	291	98	21672	c22416, g4,c22170, g3
GO:0016787	hydrolase activity	molecular function	1	62	291	3869	21672	c18517, g1,c15288, g1,c1974, g1,c23406, g1,c24773, g1,c17599, g1,c11792, g1,c25731, g1,c23934, g3,c25383, g2,c24684, g1,c31549, g1,c23404, g1,c20100, g1,c21896, g1,c1992, g1,c19588, g1,c26451, g1,c25925, g1,c26628, g1,c17336, g1,c23984, g1,c19549, g1,c25361, g1,c23357, g1,c26197, g1,c25889, g1,c19517, g1,c14174, g1,c21979, g1,c25090, g1,c25409, g1,c24705, g3,c24062, g1,c24621, g1,c26330, g1,c2176…
GO:0006119	oxidative phosphorylation	biological process	1	6	291	401	21672	c25375, g1,c31140, g1,c17572, g1,c42901, g1,c44009, g1,c47020, g1
GO:0003682	chromatin binding	molecular function	1	2	291	66	21672	c22015, g1,c26684, g1
GO:0034470	ncRNA processing	biological process	1	7	291	291	21672	c23405, g1,c23018, g1,c23637, g1,c23301, g1,c18594, g1,c21769, g1,c22936, g1
GO:0005840	ribosome	cellular component	1	19	291	1665	21672	c10710, g1,c22009, g1,c22643, g1,c18370, g1,c21721, g1,c25889, g1,c19993, g1,c23152, g1,c18044, g1,c22416, g4,c17117, g1,c19812, g2,c22170, g3,c18074, g1,c20180, g2,c21364, g2,c11792, g1,c24688, g1,c19311, g1
GO:0016620	oxidoreductase activity, acting on the aldehyde or oxo group of donors, NAD or NADP as acceptor	molecular function	1	2	291	87	21672	c24608, g1,c25889, g1
GO:0004611	phosphoenolpyruvate carboxykinase activity	molecular function	1	1	291	33	21672	c23751, g1
GO:0015629	actin cytoskeleton	cellular component	1	4	291	206	21672	c39084, g1,c20100, g1,c23030, g1,c25731, g1
GO:0046165	alcohol biosynthetic process	biological process	1	2	291	66	21672	c20511, g1,c22737, g1
GO:0031640	killing of cells of other organism	biological process	1	1	291	15	21672	c26939, g1
GO:0044364	disruption of cells of other organism	biological process	1	1	291	15	21672	c26939, g1
GO:0051818	disruption of cells of other organism involved in symbiotic interaction	biological process	1	1	291	15	21672	c26939, g1
GO:0051883	killing of cells in other organism involved in symbiotic interaction	biological process	1	1	291	15	21672	c26939, g1
GO:0044703	multi-organism reproductive process	biological process	1	1	291	23	21672	c23089, g3
GO:0051168	nuclear export	biological process	1	1	291	31	21672	c27060, g1
GO:0004559	alpha-mannosidase activity	molecular function	1	1	291	16	21672	c26628, g1
GO:0004601	peroxidase activity	molecular function	1	2	291	70	21672	c25253, g2,c25253, g1
GO:0006804	peroxidase reaction	biological process	1	2	291	70	21672	c25253, g1,c25253, g2
GO:0016684	oxidoreductase activity, acting on peroxide as acceptor	molecular function	1	2	291	70	21672	c25253, g2,c25253, g1
GO:0008374	O-acyltransferase activity	molecular function	1	1	291	19	21672	c26197, g1
GO:0004197	cysteine-type endopeptidase activity	molecular function	1	3	291	117	21672	c6643, g1,c23406, g1,c1992, g1
GO:0016774	phosphotransferase activity, carboxyl group as acceptor	molecular function	1	1	291	23	21672	c23005, g1
GO:0030430	host cell cytoplasm	cellular component	1	1	291	19	21672	c21879, g1
GO:0019888	protein phosphatase regulator activity	molecular function	1	1	291	17	21672	c21421, g1
GO:1901606	alpha-amino acid catabolic process	biological process	1	4	291	194	21672	c23400, g1,c25016, g1,c25356, g1,c21880, g1
GO:0019033	viral tegument	cellular component	1	1	291	23	21672	c23089, g3
GO:0019318	hexose metabolic process	biological process	1	6	291	396	21672	c26628, g1,c24608, g1,c23751, g1,c25710, g1,c23005, g1,c22122, g1
GO:0000103	sulfate assimilation	biological process	1	1	291	20	21672	c26330, g1
GO:0004020	adenylylsulfate kinase activity	molecular function	1	1	291	20	21672	c26330, g1
GO:0046434	organophosphate catabolic process	biological process	1	8	291	437	21672	c21840, g1,c24684, g1,c24705, g1,c25731, g1,c15972, g1,c25925, g1,c23404, g1,c25889, g1
GO:0030529	ribonucleoprotein complex	cellular component	1	22	291	1893	21672	c19812, g2,c18074, g1,c22170, g3,c22643, g1,c18370, g1,c10710, g1,c22009, g1,c18044, g1,c23152, g1,c22416, g4,c19993, g1,c25889, g1,c21721, g1,c21613, g4,c17117, g1,c11792, g1,c21769, g1,c20425, g1,c24688, g1,c19311, g1,c20180, g2,c21364, g2
GO:0016813	hydrolase activity, acting on carbon-nitrogen (but not peptide) bonds, in linear amidines	molecular function	1	1	291	22	21672	c19517, g1
GO:0051130	positive regulation of cellular component organization	biological process	1	1	291	40	21672	c19812, g2
GO:0006091	generation of precursor metabolites and energy	biological process	1	12	291	894	21672	c31140, g1,c25375, g1,c22737, g1,c44009, g1,c24608, g1,c42901, g1,c23005, g1,c17572, g1,c23751, g1,c47020, g1,c31181, g1,c25710, g1
GO:0051028	mRNA transport	biological process	1	1	291	26	21672	c27060, g1
GO:0032040	small-subunit processome	cellular component	1	2	291	74	21672	c21613, g4,c20425, g1
GO:0019897	extrinsic to plasma membrane	cellular component	1	1	291	22	21672	c23993, g1
GO:0010604	positive regulation of macromolecule metabolic process	biological process	1	2	291	96	21672	c18353, g1,c19812, g2
GO:0019915	lipid storage	biological process	1	1	291	22	21672	c23989, g1
GO:0016701	oxidoreductase activity, acting on single donors with incorporation of molecular oxygen	molecular function	1	2	291	77	21672	c22168, g1,c22643, g1
GO:0016746	transferase activity, transferring acyl groups	molecular function	1	7	291	379	21672	c21108, g1,c23400, g1,c20317, g1,c20952, g1,c21585, g1,c26197, g1,c21838, g1
GO:0006007	glucose catabolic process	biological process	1	4	291	255	21672	c23005, g1,c22122, g1,c24608, g1,c25710, g1
GO:0016709	oxidoreductase activity, acting on paired donors, with incorporation or reduction of molecular oxygen, NAD(P)H as one donor, and incorporation of one atom of oxygen	molecular function	1	1	291	24	21672	c23301, g1
GO:0042600	chorion	cellular component	1	1	291	31	21672	c17117, g1
GO:0019320	hexose catabolic process	biological process	1	4	291	259	21672	c24608, g1,c25710, g1,c22122, g1,c23005, g1
GO:0019208	phosphatase regulator activity	molecular function	1	1	291	20	21672	c21421, g1
GO:0001906	cell killing	biological process	1	1	291	17	21672	c26939, g1
GO:0006084	acetyl-CoA metabolic process	biological process	1	1	291	26	21672	c23400, g1
GO:0006553	lysine metabolic process	biological process	1	3	291	130	21672	c25016, g1,c24608, g1,c21880, g1
GO:0019064	viral entry into host cell via membrane fusion with the plasma membrane	biological process	1	1	291	21	21672	c22168, g1
GO:0005798	Golgi-associated vesicle	cellular component	1	1	291	26	21672	c17485, g1
GO:0030660	Golgi-associated vesicle membrane	cellular component	1	1	291	26	21672	c17485, g1
GO:0044036	cell wall macromolecule metabolic process	biological process	1	2	291	79	21672	c24634, g2,c20300, g1
GO:0005996	monosaccharide metabolic process	biological process	1	6	291	405	21672	c24608, g1,c26628, g1,c25710, g1,c23751, g1,c22122, g1,c23005, g1
GO:0015923	mannosidase activity	molecular function	1	1	291	19	21672	c26628, g1
GO:0000156	phosphorelay response regulator activity	molecular function	1	1	291	29	21672	c23005, g1
GO:0008443	phosphofructokinase activity	molecular function	1	1	291	26	21672	c25710, g1
GO:0009063	cellular amino acid catabolic process	biological process	1	4	291	207	21672	c23400, g1,c25016, g1,c21880, g1,c25356, g1
GO:0009404	toxin metabolic process	biological process	1	1	291	23	21672	c23856, g1
GO:0016628	oxidoreductase activity, acting on the CH-CH group of donors, NAD or NADP as acceptor	molecular function	1	2	291	71	21672	c23637, g1,c24608, g1
GO:0046914	transition metal ion binding	molecular function	1	30	291	1828	21672	c21629, g1,c24337, g1,c25090, g1,c18353, g1,c10720, g1,c18517, g1,c17400, g1,c42901, g1,c3262, g1,c16663, g1,c19631, g1,c21280, g1,c23005, g1,c19846, g1,c25769, g1,c25528, g1,c24150, g1,c26197, g1,c23572, g1,c47020, g1,c31140, g1,c22737, g1,c26451, g1,c18074, g1,c25418, g1,c26628, g1,c22365, g1,c15875, g1,c24789, g1,c25705, g1
GO:1901700	response to oxygen-containing compound	biological process	1	1	291	33	21672	c25253, g2
GO:0031965	nuclear membrane	cellular component	1	1	291	22	21672	c27060, g1
GO:0043021	ribonucleoprotein complex binding	molecular function	1	1	291	43	21672	c19812, g2
GO:0007018	microtubule-based movement	biological process	1	2	291	85	21672	c15972, g1,c23404, g1
GO:0032270	positive regulation of cellular protein metabolic process	biological process	1	1	291	45	21672	c19812, g2
GO:0005779	integral to peroxisomal membrane	cellular component	1	1	291	23	21672	c20317, g1
GO:0031231	intrinsic to peroxisomal membrane	cellular component	1	1	291	23	21672	c20317, g1
GO:0006518	peptide metabolic process	biological process	1	2	291	82	21672	c19549, g1,c25467, g1
GO:0031090	organelle membrane	cellular component	1	12	291	737	21672	c24634, g2,c20317, g1,c31140, g1,c17485, g1,c24634, g1,c42901, g1,c21838, g1,c27060, g1,c17572, g1,c19549, g1,c20522, g1,c47020, g1
GO:0044421	extracellular region part	cellular component	1	8	291	401	21672	c24062, g1,c21879, g1,c18256, g1,c20118, g1,c19629, g1,c15632, g1,c22933, g1,c22168, g1
GO:0044550	secondary metabolite biosynthetic process	biological process	1	2	291	63	21672	c23856, g1,c20511, g1
GO:0046365	monosaccharide catabolic process	biological process	1	4	291	265	21672	c22122, g1,c23005, g1,c24608, g1,c25710, g1
GO:0005604	basement membrane	cellular component	1	2	291	65	21672	c18256, g1,c20118, g1
GO:0015976	carbon utilization	biological process	1	2	291	124	21672	c23751, g1,c23005, g1
GO:0008565	protein transporter activity	molecular function	1	2	291	87	21672	c19367, g1,c21198, g1
GO:0006302	double-strand break repair	biological process	1	1	291	22	21672	c22365, g1
GO:0030684	preribosome	cellular component	1	2	291	83	21672	c20425, g1,c21613, g4
GO:0004540	ribonuclease activity	molecular function	1	2	291	66	21672	c18517, g1,c21769, g1
GO:1901617	organic hydroxy compound biosynthetic process	biological process	1	2	291	72	21672	c20511, g1,c22737, g1
GO:0016811	hydrolase activity, acting on carbon-nitrogen (but not peptide) bonds, in linear amides	molecular function	1	1	291	27	21672	c31549, g1
GO:0031966	mitochondrial membrane	cellular component	1	6	291	384	21672	c47020, g1,c24634, g1,c42901, g1,c17572, g1,c24634, g2,c31140, g1
GO:0005787	signal peptidase complex	cellular component	1	1	291	27	21672	c19549, g1
GO:0042597	periplasmic space	cellular component	1	1	291	29	21672	c19367, g1
GO:0043169	cation binding	molecular function	1	47	291	2988	21672	c18517, g1,c18353, g1,c3262, g1,c25253, g2,c21280, g1,c22288, g1,c25824, g1,c24337, g1,c26451, g1,c18074, g1,c19212, g1,c25705, g1,c26628, g1,c22365, g1,c25838, g1,c15875, g1,c25769, g1,c23704, g1,c21842, g1,c47020, g1,c26197, g1,c19517, g1,c25090, g1,c10720, g1,c16663, g1,c19631, g1,c17400, g1,c42901, g1,c39084, g1,c21629, g1,c23942, g1,c31181, g1,c26955, g1,c24695, g1,c31140, g1,c25375, g1,c227…
GO:0044743	intracellular protein transmembrane import	biological process	1	1	291	31	21672	c21343, g1
GO:0051247	positive regulation of protein metabolic process	biological process	1	1	291	46	21672	c19812, g2
GO:0000902	cell morphogenesis	biological process	1	2	291	72	21672	c22816, g1,c25950, g1
GO:0006541	glutamine metabolic process	biological process	1	1	291	27	21672	c20300, g1
GO:0042537	benzene-containing compound metabolic process	biological process	1	2	291	91	21672	c21880, g1,c25016, g1
GO:0016891	endoribonuclease activity, producing 5'-phosphomonoesters	molecular function	1	1	291	27	21672	c21769, g1
GO:0009252	peptidoglycan biosynthetic process	biological process	1	1	291	28	21672	c20300, g1
GO:0016765	transferase activity, transferring alkyl or aryl (other than methyl) groups	molecular function	1	2	291	89	21672	c22258, g1,c23018, g1
GO:0005778	peroxisomal membrane	cellular component	1	1	291	25	21672	c20317, g1
GO:0031903	microbody membrane	cellular component	1	1	291	25	21672	c20317, g1
GO:0044438	microbody part	cellular component	1	1	291	25	21672	c20317, g1
GO:0044439	peroxisomal part	cellular component	1	1	291	25	21672	c20317, g1
GO:0051539	4 iron, 4 sulfur cluster binding	molecular function	1	1	291	48	21672	c21289, g1
GO:0009147	pyrimidine nucleoside triphosphate metabolic process	biological process	1	1	291	29	21672	c19566, g4
GO:0016023	cytoplasmic membrane-bounded vesicle	cellular component	1	2	291	89	21672	c21838, g1,c17485, g1
GO:0022412	cellular process involved in reproduction in multicellular organism	biological process	1	1	291	35	21672	c17117, g1
GO:0019752	carboxylic acid metabolic process	biological process	1	26	291	1670	21672	c25838, g1,c24852, g1,c21838, g1,c24608, g1,c16769, g1,c22122, g1,c22167, g1,c25467, g1,c25889, g1,c21880, g1,c25356, g1,c22943, g1,c25016, g1,c22813, g1,c19631, g1,c25253, g2,c25253, g1,c21280, g1,c25090, g1,c22258, g1,c23400, g1,c22893, g1,c9941, g2,c20300, g1,c21108, g1,c21629, g1
GO:0000139	Golgi membrane	cellular component	1	2	291	79	21672	c20522, g1,c17485, g1
GO:0009273	peptidoglycan-based cell wall biogenesis	biological process	1	1	291	30	21672	c20300, g1
GO:0008061	chitin binding	molecular function	1	1	291	30	21672	c23993, g1
GO:0044403	symbiosis, encompassing mutualism through parasitism	biological process	1	10	291	493	21672	c22943, g1,c22168, g1,c26955, g1,c22893, g1,c18353, g1,c26451, g1,c16663, g1,c21879, g1,c26939, g1,c20952, g1
GO:0006547	histidine metabolic process	biological process	1	1	291	30	21672	c25356, g1
GO:0052803	imidazole-containing compound metabolic process	biological process	1	1	291	30	21672	c25356, g1
GO:0005739	mitochondrion	cellular component	1	9	291	680	21672	c24634, g1,c20739, g1,c42901, g1,c44009, g1,c24634, g2,c31140, g1,c47020, g1,c31181, g1,c17572, g1
GO:0031988	membrane-bounded vesicle	cellular component	1	2	291	90	21672	c17485, g1,c21838, g1
GO:0006465	signal peptide processing	biological process	1	1	291	29	21672	c19549, g1
GO:0005874	microtubule	cellular component	1	2	291	94	21672	c15972, g1,c23404, g1
GO:0005525	GTP binding	molecular function	1	11	291	674	21672	c24705, g3,c23406, g1,c21840, g1,c24705, g1,c26330, g1,c25880, g2,c15972, g1,c20055, g1,c25925, g1,c23404, g1,c25889, g1
GO:0044419	interspecies interaction between organisms	biological process	1	10	291	495	21672	c22943, g1,c22168, g1,c26955, g1,c22893, g1,c18353, g1,c26451, g1,c16663, g1,c26939, g1,c21879, g1,c20952, g1
GO:0005746	mitochondrial respiratory chain	cellular component	1	1	291	54	21672	c17572, g1
GO:0004659	prenyltransferase activity	molecular function	1	1	291	28	21672	c23018, g1
GO:0065002	intracellular protein transmembrane transport	biological process	1	1	291	34	21672	c21343, g1
GO:0004190	aspartic-type endopeptidase activity	molecular function	1	2	291	99	21672	c21896, g1,c21865, g1
GO:0070001	aspartic-type peptidase activity	molecular function	1	2	291	99	21672	c21896, g1,c21865, g1
GO:0008236	serine-type peptidase activity	molecular function	1	6	291	325	21672	c22565, g1,c22001, g1,c23406, g1,c1974, g1,c25783, g1,c23357, g1
GO:0017171	serine hydrolase activity	molecular function	1	6	291	325	21672	c23406, g1,c22001, g1,c1974, g1,c22565, g1,c25783, g1,c23357, g1
GO:0043436	oxoacid metabolic process	biological process	1	26	291	1688	21672	c25253, g2,c25253, g1,c21280, g1,c19631, g1,c22813, g1,c22258, g1,c23400, g1,c22893, g1,c25090, g1,c9941, g2,c21108, g1,c21629, g1,c20300, g1,c25838, g1,c24608, g1,c24852, g1,c21838, g1,c25467, g1,c22122, g1,c16769, g1,c22167, g1,c25356, g1,c25889, g1,c21880, g1,c25016, g1,c22943, g1
GO:0006449	regulation of translational termination	biological process	1	1	291	35	21672	c19812, g2
GO:0030658	transport vesicle membrane	cellular component	1	1	291	37	21672	c21838, g1
GO:0032561	guanyl ribonucleotide binding	molecular function	1	11	291	679	21672	c25889, g1,c23404, g1,c20055, g1,c25925, g1,c24705, g1,c26330, g1,c25880, g2,c15972, g1,c24705, g3,c23406, g1,c21840, g1
GO:0016055	Wnt receptor signaling pathway	biological process	1	1	291	29	21672	c24337, g1
GO:0009085	lysine biosynthetic process	biological process	1	1	291	30	21672	c24608, g1
GO:0006637	acyl-CoA metabolic process	biological process	1	1	291	33	21672	c23400, g1
GO:0035383	thioester metabolic process	biological process	1	1	291	33	21672	c23400, g1
GO:0006730	one-carbon metabolic process	biological process	1	1	291	45	21672	c17400, g1
GO:0006082	organic acid metabolic process	biological process	1	26	291	1692	21672	c22943, g1,c25016, g1,c21880, g1,c25889, g1,c25356, g1,c22167, g1,c22122, g1,c16769, g1,c25467, g1,c21838, g1,c24852, g1,c24608, g1,c25838, g1,c20300, g1,c21108, g1,c21629, g1,c9941, g2,c25090, g1,c22893, g1,c23400, g1,c22258, g1,c22813, g1,c25253, g2,c25253, g1,c19631, g1,c21280, g1
GO:0004455	ketol-acid reductoisomerase activity	molecular function	1	1	291	25	21672	c22122, g1
GO:0016209	antioxidant activity	molecular function	1	3	291	163	21672	c25253, g1,c25253, g2,c22288, g1
GO:0019001	guanyl nucleotide binding	molecular function	1	11	291	688	21672	c24705, g3,c23406, g1,c21840, g1,c26330, g1,c15972, g1,c25880, g2,c24705, g1,c20055, g1,c25925, g1,c23404, g1,c25889, g1
GO:1901607	alpha-amino acid biosynthetic process	biological process	1	5	291	314	21672	c20300, g1,c22122, g1,c25016, g1,c24608, g1,c25838, g1
GO:0003887	DNA-directed DNA polymerase activity	molecular function	1	2	291	75	21672	c20430, g1,c26451, g1
GO:0016831	carboxy-lyase activity	molecular function	1	3	291	165	21672	c22813, g1,c23751, g1,c9941, g2
GO:0046655	folic acid metabolic process	biological process	1	1	291	33	21672	c25838, g1
GO:0046656	folic acid biosynthetic process	biological process	1	1	291	33	21672	c25838, g1
GO:0006888	ER to Golgi vesicle-mediated transport	biological process	1	1	291	40	21672	c21838, g1
GO:0003746	translation elongation factor activity	molecular function	1	2	291	126	21672	c25889, g1,c19812, g2
GO:0003968	RNA-directed RNA polymerase activity	molecular function	1	2	291	74	21672	c26955, g1,c23406, g1
GO:0031379	RNA-directed RNA polymerase complex	cellular component	1	2	291	74	21672	c23406, g1,c26955, g1
GO:0051239	regulation of multicellular organismal process	biological process	1	2	291	88	21672	c23763, g1,c22456, g1
GO:0006913	nucleocytoplasmic transport	biological process	1	2	291	104	21672	c27060, g1,c21840, g1
GO:0051169	nuclear transport	biological process	1	2	291	104	21672	c27060, g1,c21840, g1
GO:0048856	anatomical structure development	biological process	1	8	291	476	21672	c23989, g1,c17117, g1,c19342, g1,c26955, g1,c25950, g1,c22816, g1,c21840, g1,c16663, g1
GO:0048477	oogenesis	biological process	1	1	291	40	21672	c17117, g1
GO:0009084	glutamine family amino acid biosynthetic process	biological process	1	1	291	37	21672	c20300, g1
GO:0007049	cell cycle	biological process	1	8	291	486	21672	c24876, g1,c31140, g1,c22308, g1,c25925, g1,c22053, g1,c22926, g1,c21198, g1,c23930, g1
GO:0044038	cell wall macromolecule biosynthetic process	biological process	1	1	291	35	21672	c20300, g1
GO:0070589	cellular component macromolecule biosynthetic process	biological process	1	1	291	35	21672	c20300, g1
GO:0006415	translational termination	biological process	1	1	291	40	21672	c19812, g2
GO:0009218	pyrimidine ribonucleotide metabolic process	biological process	1	1	291	37	21672	c22416, g4
GO:0009220	pyrimidine ribonucleotide biosynthetic process	biological process	1	1	291	37	21672	c22416, g4
GO:0071554	cell wall organization or biogenesis	biological process	1	2	291	108	21672	c20300, g1,c24634, g2
GO:0019200	carbohydrate kinase activity	molecular function	1	1	291	42	21672	c25710, g1
GO:0044724	single-organism carbohydrate catabolic process	biological process	1	4	291	283	21672	c22122, g1,c23005, g1,c24608, g1,c25710, g1
GO:0009791	post-embryonic development	biological process	1	4	291	236	21672	c19342, g1,c26955, g1,c16663, g1,c23989, g1
GO:0019048	modulation by virus of host morphology or physiology	biological process	1	2	291	63	21672	c20952, g1,c18353, g1
GO:0043624	cellular protein complex disassembly	biological process	1	1	291	42	21672	c19812, g2
GO:0006412	translation	biological process	1	20	291	1834	21672	c21364, g2,c20180, g2,c19311, g1,c24688, g1,c11792, g1,c22943, g1,c17117, g1,c23152, g1,c18044, g1,c22416, g4,c19993, g1,c25889, g1,c21721, g1,c22643, g1,c18370, g1,c22009, g1,c10710, g1,c18074, g1,c22170, g3,c19812, g2
GO:0010035	response to inorganic substance	biological process	1	1	291	52	21672	c25253, g2
GO:0006013	mannose metabolic process	biological process	1	2	291	113	21672	c25710, g1,c26628, g1
GO:0005217	intracellular ligand-gated ion channel activity	molecular function	1	1	291	32	21672	c38857, g1
GO:0005218	intracellular ligand-gated calcium channel activity	molecular function	1	1	291	32	21672	c38857, g1
GO:0005219	ryanodine-sensitive calcium-release channel activity	molecular function	1	1	291	32	21672	c38857, g1
GO:0015278	calcium-release channel activity	molecular function	1	1	291	32	21672	c38857, g1
GO:0009288	bacterial-type flagellum	cellular component	1	1	291	40	21672	c26628, g1
GO:0006026	aminoglycan catabolic process	biological process	1	1	291	39	21672	c24634, g2
GO:0004521	endoribonuclease activity	molecular function	1	1	291	34	21672	c21769, g1
GO:0007292	female gamete generation	biological process	1	1	291	44	21672	c17117, g1
GO:0006448	regulation of translational elongation	biological process	1	2	291	137	21672	c25889, g1,c19812, g2
GO:0043244	regulation of protein complex disassembly	biological process	1	1	291	38	21672	c19812, g2
GO:0032989	cellular component morphogenesis	biological process	1	2	291	88	21672	c25950, g1,c22816, g1
GO:0042575	DNA polymerase complex	cellular component	1	2	291	83	21672	c26451, g1,c20430, g1
GO:0016054	organic acid catabolic process	biological process	1	4	291	237	21672	c25016, g1,c23400, g1,c25356, g1,c21880, g1
GO:0046395	carboxylic acid catabolic process	biological process	1	4	291	237	21672	c21880, g1,c25356, g1,c25016, g1,c23400, g1
GO:0043603	cellular amide metabolic process	biological process	1	4	291	210	21672	c25467, g1,c19549, g1,c22122, g1,c25356, g1
GO:0042254	ribosome biogenesis	biological process	1	16	291	1508	21672	c21364, g2,c20180, g2,c24688, g1,c19311, g1,c17117, g1,c18370, g1,c22009, g1,c10710, g1,c18044, g1,c23152, g1,c22416, g4,c19993, g1,c21721, g1,c22170, g3,c18074, g1,c18594, g1
GO:0044282	small molecule catabolic process	biological process	1	4	291	242	21672	c23400, g1,c25016, g1,c21880, g1,c25356, g1
GO:0044712	single-organism catabolic process	biological process	1	4	291	242	21672	c23400, g1,c25016, g1,c21880, g1,c25356, g1
GO:0030133	transport vesicle	cellular component	1	1	291	46	21672	c21838, g1
GO:0071806	protein transmembrane transport	biological process	1	1	291	41	21672	c21343, g1
GO:0044272	sulfur compound biosynthetic process	biological process	1	2	291	111	21672	c22258, g1,c25467, g1
GO:0006399	tRNA metabolic process	biological process	1	7	291	383	21672	c23405, g1,c22943, g1,c23301, g1,c23637, g1,c23018, g1,c21769, g1,c22936, g1
GO:0006536	glutamate metabolic process	biological process	1	1	291	58	21672	c25356, g1
GO:0006874	cellular calcium ion homeostasis	biological process	1	1	291	34	21672	c38857, g1
GO:0072503	cellular divalent inorganic cation homeostasis	biological process	1	1	291	34	21672	c38857, g1
GO:0016568	chromatin modification	biological process	1	2	291	82	21672	c26684, g1,c22015, g1
GO:0055074	calcium ion homeostasis	biological process	1	1	291	35	21672	c38857, g1
GO:0072507	divalent inorganic cation homeostasis	biological process	1	1	291	35	21672	c38857, g1
GO:0016903	oxidoreductase activity, acting on the aldehyde or oxo group of donors	molecular function	1	2	291	117	21672	c24608, g1,c25889, g1
GO:0006024	glycosaminoglycan biosynthetic process	biological process	1	1	291	35	21672	c20300, g1
GO:0004616	phosphogluconate dehydrogenase (decarboxylating) activity	molecular function	1	1	291	38	21672	c22122, g1
GO:0019520	aldonic acid metabolic process	biological process	1	1	291	38	21672	c22122, g1
GO:0019521	D-gluconate metabolic process	biological process	1	1	291	38	21672	c22122, g1
GO:0022613	ribonucleoprotein complex biogenesis	biological process	1	16	291	1520	21672	c20180, g2,c21364, g2,c19311, g1,c24688, g1,c21721, g1,c19993, g1,c23152, g1,c18044, g1,c22416, g4,c10710, g1,c22009, g1,c18370, g1,c17117, g1,c18594, g1,c22170, g3,c18074, g1
GO:0046148	pigment biosynthetic process	biological process	1	4	291	182	21672	c23637, g1,c25365, g1,c23301, g1,c26330, g1
GO:0043086	negative regulation of catalytic activity	biological process	1	1	291	56	21672	c25783, g1
GO:0044092	negative regulation of molecular function	biological process	1	1	291	56	21672	c25783, g1
GO:0030976	thiamine pyrophosphate binding	molecular function	1	1	291	38	21672	c23704, g1
GO:0042546	cell wall biogenesis	biological process	1	1	291	51	21672	c20300, g1
GO:0046912	transferase activity, transferring acyl groups, acyl groups converted into alkyl on transfer	molecular function	1	1	291	44	21672	c23400, g1
GO:0016888	endodeoxyribonuclease activity, producing 5'-phosphomonoesters	molecular function	1	1	291	35	21672	c24773, g1
GO:0016998	cell wall macromolecule catabolic process	biological process	1	1	291	41	21672	c24634, g2
GO:0006554	lysine catabolic process	biological process	1	2	291	101	21672	c21880, g1,c25016, g1
GO:0009068	aspartate family amino acid catabolic process	biological process	1	2	291	101	21672	c25016, g1,c21880, g1
GO:0043241	protein complex disassembly	biological process	1	1	291	45	21672	c19812, g2
GO:0006098	pentose-phosphate shunt	biological process	1	2	291	134	21672	c25710, g1,c22122, g1
GO:0006740	NADPH regeneration	biological process	1	2	291	134	21672	c22122, g1,c25710, g1
GO:0005740	mitochondrial envelope	cellular component	1	6	291	431	21672	c17572, g1,c24634, g2,c31140, g1,c47020, g1,c24634, g1,c42901, g1
GO:0008408	3'-5' exonuclease activity	molecular function	1	1	291	29	21672	c26451, g1
GO:0031410	cytoplasmic vesicle	cellular component	1	2	291	107	21672	c21838, g1,c17485, g1
GO:0019904	protein domain specific binding	molecular function	1	1	291	45	21672	c21163, g1
GO:0016052	carbohydrate catabolic process	biological process	1	4	291	309	21672	c22122, g1,c23005, g1,c25710, g1,c24608, g1
GO:0031982	vesicle	cellular component	1	2	291	108	21672	c17485, g1,c21838, g1
GO:0008083	growth factor activity	molecular function	1	1	291	45	21672	c20100, g1
GO:0007155	cell adhesion	biological process	1	4	291	189	21672	c22456, g1,c18256, g1,c26955, g1,c20118, g1
GO:0008831	dTDP-4-dehydrorhamnose reductase activity	molecular function	1	1	291	29	21672	c20511, g1
GO:0009072	aromatic amino acid family metabolic process	biological process	1	4	291	226	21672	c25253, g2,c25253, g1,c21880, g1,c25016, g1
GO:0004520	endodeoxyribonuclease activity	molecular function	1	1	291	38	21672	c24773, g1
GO:0006687	glycosphingolipid metabolic process	biological process	1	1	291	41	21672	c11792, g1
GO:0016706	oxidoreductase activity, acting on paired donors, with incorporation or reduction of molecular oxygen, 2-oxoglutarate as one donor, and incorporation of one atom each of oxygen into both donors	molecular function	1	1	291	37	21672	c26401, g2
GO:0032984	macromolecular complex disassembly	biological process	1	1	291	49	21672	c19812, g2
GO:0019748	secondary metabolic process	biological process	1	2	291	85	21672	c20511, g1,c23856, g1
GO:0016051	carbohydrate biosynthetic process	biological process	1	8	291	494	21672	c23751, g1,c25710, g1,c31549, g1,c20511, g1,c23005, g1,c24177, g1,c24608, g1,c21583, g1
GO:0006575	cellular modified amino acid metabolic process	biological process	1	5	291	296	21672	c25838, g1,c22122, g1,c22258, g1,c25016, g1,c25467, g1
GO:0031683	G-protein beta/gamma-subunit complex binding	molecular function	1	2	291	100	21672	c26330, g1,c21840, g1
GO:0009141	nucleoside triphosphate metabolic process	biological process	1	10	291	695	21672	c25889, g1,c19566, g4,c23404, g1,c25925, g1,c24684, g1,c25731, g1,c24705, g1,c15972, g1,c21840, g1,c23406, g1
GO:0006200	ATP catabolic process	biological process	1	1	291	70	21672	c25925, g1
GO:0016638	oxidoreductase activity, acting on the CH-NH2 group of donors	molecular function	1	1	291	58	21672	c24852, g1
GO:0032313	regulation of Rab GTPase activity	biological process	1	1	291	25	21672	c25731, g1
GO:0032482	Rab protein signal transduction	biological process	1	1	291	25	21672	c25731, g1
GO:0032483	regulation of Rab protein signal transduction	biological process	1	1	291	25	21672	c25731, g1
GO:0008135	translation factor activity, nucleic acid binding	molecular function	1	4	291	308	21672	c19812, g2,c25889, g1,c22643, g1,c11792, g1
GO:0000785	chromatin	cellular component	1	2	291	126	21672	c26684, g1,c22015, g1
GO:0005097	Rab GTPase activator activity	molecular function	1	1	291	26	21672	c25731, g1
GO:0006875	cellular metal ion homeostasis	biological process	1	1	291	49	21672	c38857, g1
GO:0006749	glutathione metabolic process	biological process	1	1	291	49	21672	c25467, g1
GO:0042440	pigment metabolic process	biological process	1	4	291	194	21672	c26330, g1,c23301, g1,c23637, g1,c25365, g1
GO:0061024	membrane organization	biological process	1	2	291	112	21672	c27060, g1,c22168, g1
GO:0030003	cellular cation homeostasis	biological process	1	1	291	50	21672	c38857, g1
GO:0022411	cellular component disassembly	biological process	1	1	291	52	21672	c19812, g2
GO:0004252	serine-type endopeptidase activity	molecular function	1	4	291	234	21672	c23357, g1,c25783, g1,c23406, g1,c1974, g1
GO:0003916	DNA topoisomerase activity	molecular function	1	1	291	44	21672	c18303, g1
GO:0016763	transferase activity, transferring pentosyl groups	molecular function	1	1	291	53	21672	c23956, g1
GO:0006221	pyrimidine nucleotide biosynthetic process	biological process	1	1	291	49	21672	c22416, g4
GO:0044429	mitochondrial part	cellular component	1	6	291	462	21672	c31140, g1,c24634, g2,c17572, g1,c42901, g1,c24634, g1,c47020, g1
GO:0006873	cellular ion homeostasis	biological process	1	1	291	52	21672	c38857, g1
GO:0019076	viral release from host cell	biological process	1	1	291	39	21672	c21879, g1
GO:0071840	cellular component organization or biogenesis	biological process	1	33	291	2760	21672	c21343, g1,c10710, g1,c22009, g1,c19993, g1,c21721, g1,c25950, g1,c23152, g1,c18044, g1,c24634, g2,c27060, g1,c15972, g1,c19812, g2,c22568, g1,c20300, g1,c21364, g2,c20317, g1,c23030, g1,c17117, g1,c22015, g1,c18370, g1,c22416, g4,c20430, g1,c22170, g3,c18074, g1,c22816, g1,c18594, g1,c26628, g1,c23404, g1,c22168, g1,c20180, g2,c24688, g1,c19311, g1,c26684, g1
GO:0009099	valine biosynthetic process	biological process	1	1	291	54	21672	c22122, g1
GO:0006367	transcription initiation from RNA polymerase II promoter	biological process	1	1	291	45	21672	c22063, g1
GO:0006739	NADP metabolic process	biological process	1	2	291	141	21672	c25710, g1,c22122, g1
GO:0006090	pyruvate metabolic process	biological process	1	2	291	135	21672	c9941, g2,c22167, g1
GO:0000270	peptidoglycan metabolic process	biological process	1	1	291	48	21672	c20300, g1
GO:0006928	cellular component movement	biological process	1	3	291	189	21672	c23404, g1,c26628, g1,c15972, g1
GO:1901575	organic substance catabolic process	biological process	1	21	291	1485	21672	c25356, g1,c2648, g1,c25889, g1,c26197, g1,c21880, g1,c25016, g1,c23005, g1,c25925, g1,c15972, g1,c24608, g1,c22737, g1,c22122, g1,c24634, g2,c21840, g1,c25710, g1,c23404, g1,c24773, g1,c24684, g1,c25731, g1,c24705, g1,c23400, g1
GO:0045226	extracellular polysaccharide biosynthetic process	biological process	1	1	291	33	21672	c20511, g1
GO:0046379	extracellular polysaccharide metabolic process	biological process	1	1	291	33	21672	c20511, g1
GO:0009097	isoleucine biosynthetic process	biological process	1	1	291	56	21672	c22122, g1
GO:0004806	triglyceride lipase activity	molecular function	1	1	291	33	21672	c26197, g1
GO:0006012	galactose metabolic process	biological process	1	1	291	66	21672	c25710, g1
GO:0007264	small GTPase mediated signal transduction	biological process	1	8	291	431	21672	c25880, g2,c24705, g1,c25731, g1,c25925, g1,c20055, g1,c21840, g1,c24705, g3,c25889, g1
GO:0045893	positive regulation of transcription, DNA-dependent	biological process	1	1	291	54	21672	c18353, g1
GO:0030259	lipid glycosylation	biological process	1	1	291	38	21672	c23556, g1
GO:0001510	RNA methylation	biological process	1	1	291	34	21672	c22416, g4
GO:0030638	polyketide metabolic process	biological process	1	1	291	34	21672	c20511, g1
GO:0030639	polyketide biosynthetic process	biological process	1	1	291	34	21672	c20511, g1
GO:0009312	oligosaccharide biosynthetic process	biological process	1	1	291	52	21672	c31549, g1
GO:0010628	positive regulation of gene expression	biological process	1	1	291	56	21672	c18353, g1
GO:0048609	multicellular organismal reproductive process	biological process	1	2	291	115	21672	c17117, g1,c23089, g3
GO:0055065	metal ion homeostasis	biological process	1	1	291	53	21672	c38857, g1
GO:0032504	multicellular organism reproduction	biological process	1	2	291	116	21672	c17117, g1,c23089, g3
GO:0008948	oxaloacetate decarboxylase activity	molecular function	1	1	291	44	21672	c9941, g2
GO:0071436	sodium ion export	biological process	1	1	291	44	21672	c9941, g2
GO:0050661	NADP binding	molecular function	1	1	291	58	21672	c24608, g1
GO:0055082	cellular chemical homeostasis	biological process	1	1	291	56	21672	c38857, g1
GO:0035725	sodium ion transmembrane transport	biological process	1	1	291	45	21672	c9941, g2
GO:0044238	primary metabolic process	biological process	1	140	291	10208	21672	c22816, g1,c20430, g1,c25838, g1,c25361, g1,c22015, g1,c22943, g1,c17117, g1,c18370, g1,c15288, g1,c26684, g1,c23856, g1,c17599, g1,c25253, g1,c20511, g1,c22936, g1,c20522, g1,c23751, g1,c21840, g1,c24789, g1,c22063, g1,c19566, g4,c22571, g2,c23152, g1,c21720, g1,c25365, g1,c21979, g1,c25409, g1,c23400, g1,c22258, g1,c24705, g1,c25880, g2,c23639, g2,c19631, g1,c21997, g1,c21364, g2,c20300, g1,c22…
GO:0006265	DNA topological change	biological process	1	1	291	46	21672	c18303, g1
GO:0005088	Ras guanyl-nucleotide exchange factor activity	molecular function	1	1	291	32	21672	c24684, g1
GO:0005089	Rho guanyl-nucleotide exchange factor activity	molecular function	1	1	291	32	21672	c24684, g1
GO:0009064	glutamine family amino acid metabolic process	biological process	1	3	291	194	21672	c25356, g1,c9941, g2,c20300, g1
GO:0051254	positive regulation of RNA metabolic process	biological process	1	1	291	56	21672	c18353, g1
GO:0019031	viral envelope	cellular component	1	4	291	208	21672	c22943, g1,c23089, g3,c21172, g1,c22168, g1
GO:0036338	viral membrane	cellular component	1	4	291	208	21672	c21172, g1,c23089, g3,c22943, g1,c22168, g1
GO:0071704	organic substance metabolic process	biological process	1	146	291	10705	21672	c22816, g1,c20430, g1,c25838, g1,c22943, g1,c25361, g1,c22015, g1,c17117, g1,c18370, g1,c15288, g1,c26684, g1,c23856, g1,c17599, g1,c25253, g1,c20511, g1,c22936, g1,c23751, g1,c20522, g1,c21840, g1,c16769, g1,c24789, g1,c22063, g1,c19566, g4,c22571, g2,c23152, g1,c21720, g1,c25365, g1,c21979, g1,c25409, g1,c23993, g1,c23400, g1,c22258, g1,c24705, g1,c25880, g2,c23639, g2,c19631, g1,c21997, g1,c20…
GO:0006665	sphingolipid metabolic process	biological process	1	1	291	52	21672	c11792, g1
GO:0010181	FMN binding	molecular function	1	1	291	72	21672	c23572, g1
GO:0006023	aminoglycan biosynthetic process	biological process	1	1	291	55	21672	c20300, g1
GO:0048869	cellular developmental process	biological process	1	3	291	173	21672	c22816, g1,c17117, g1,c25950, g1
GO:0044431	Golgi apparatus part	cellular component	1	2	291	103	21672	c20522, g1,c17485, g1
GO:0033057	multicellular organismal reproductive behavior	biological process	1	1	291	42	21672	c23089, g3
GO:0034660	ncRNA metabolic process	biological process	1	8	291	484	21672	c23405, g1,c18594, g1,c21769, g1,c22943, g1,c22936, g1,c23018, g1,c23637, g1,c23301, g1
GO:0009225	nucleotide-sugar metabolic process	biological process	1	1	291	39	21672	c20511, g1
GO:0006417	regulation of translation	biological process	1	4	291	330	21672	c11792, g1,c22643, g1,c25889, g1,c19812, g2
GO:0016829	lyase activity	molecular function	1	7	291	540	21672	c25013, g1,c25356, g1,c23751, g1,c9941, g2,c22813, g1,c17400, g1,c22893, g1
GO:0046085	adenosine metabolic process	biological process	1	1	291	37	21672	c23405, g1
GO:0070525	threonylcarbamoyladenosine metabolic process	biological process	1	1	291	37	21672	c23405, g1
GO:0070526	threonylcarbamoyladenosine biosynthetic process	biological process	1	1	291	37	21672	c23405, g1
GO:0019842	vitamin binding	molecular function	1	1	291	51	21672	c23704, g1
GO:0006403	RNA localization	biological process	1	1	291	52	21672	c27060, g1
GO:0050657	nucleic acid transport	biological process	1	1	291	52	21672	c27060, g1
GO:0050658	RNA transport	biological process	1	1	291	52	21672	c27060, g1
GO:0051236	establishment of RNA localization	biological process	1	1	291	52	21672	c27060, g1
GO:0005099	Ras GTPase activator activity	molecular function	1	1	291	36	21672	c25731, g1
GO:0043650	dicarboxylic acid biosynthetic process	biological process	1	1	291	56	21672	c25838, g1
GO:0005262	calcium channel activity	molecular function	1	1	291	52	21672	c38857, g1
GO:0045935	positive regulation of nucleobase-containing compound metabolic process	biological process	1	1	291	60	21672	c18353, g1
GO:0051173	positive regulation of nitrogen compound metabolic process	biological process	1	1	291	60	21672	c18353, g1
GO:0032403	protein complex binding	molecular function	1	2	291	113	21672	c26330, g1,c21840, g1
GO:0009098	leucine biosynthetic process	biological process	1	1	291	59	21672	c22122, g1
GO:0051258	protein polymerization	biological process	1	2	291	148	21672	c23404, g1,c15972, g1
GO:0019354	siroheme biosynthetic process	biological process	1	1	291	45	21672	c23637, g1
GO:0043115	precorrin-2 dehydrogenase activity	molecular function	1	1	291	45	21672	c23637, g1
GO:0046156	siroheme metabolic process	biological process	1	1	291	45	21672	c23637, g1
GO:0046496	nicotinamide nucleotide metabolic process	biological process	1	2	291	157	21672	c22122, g1,c25710, g1
GO:0034061	DNA polymerase activity	molecular function	1	2	291	106	21672	c26451, g1,c20430, g1
GO:0022610	biological adhesion	biological process	1	4	291	211	21672	c22456, g1,c20118, g1,c26955, g1,c18256, g1
GO:0030234	enzyme regulator activity	molecular function	1	7	291	423	21672	c24684, g1,c17531, g1,c25731, g1,c18898, g2,c21006, g1,c21421, g1,c38878, g1
GO:0044706	multi-multicellular organism process	biological process	1	1	291	46	21672	c23089, g3
GO:0019098	reproductive behavior	biological process	1	1	291	45	21672	c23089, g3
GO:0030170	pyridoxal phosphate binding	molecular function	1	2	291	148	21672	c22813, g1,c23956, g1
GO:1901135	carbohydrate derivative metabolic process	biological process	1	23	291	1528	21672	c25710, g1,c20522, g1,c23404, g1,c20300, g1,c20511, g1,c31549, g1,c24705, g1,c25731, g1,c24684, g1,c11792, g1,c24177, g1,c23406, g1,c23405, g1,c22258, g1,c23993, g1,c22416, g4,c25889, g1,c19566, g4,c15972, g1,c25925, g1,c21840, g1,c24634, g2,c21583, g1
GO:0004519	endonuclease activity	molecular function	1	2	291	112	21672	c24773, g1,c21769, g1
GO:0009968	negative regulation of signal transduction	biological process	1	1	291	47	21672	c24337, g1
GO:0023057	negative regulation of signaling	biological process	1	1	291	47	21672	c24337, g1
GO:0043228	non-membrane-bounded organelle	cellular component	1	32	291	2815	21672	c18074, g1,c18303, g1,c22170, g3,c25925, g1,c26628, g1,c1966, g1,c22015, g1,c17117, g1,c18370, g1,c22643, g1,c22416, g4,c25889, g1,c24688, g1,c26684, g1,c19311, g1,c11792, g1,c25731, g1,c23404, g1,c20100, g1,c20180, g2,c15972, g1,c19812, g2,c22009, g1,c10710, g1,c18044, g1,c23152, g1,c21721, g1,c19993, g1,c23030, g1,c39084, g1,c19566, g1,c21364, g2
GO:0043232	intracellular non-membrane-bounded organelle	cellular component	1	32	291	2815	21672	c23404, g1,c20100, g1,c20180, g2,c24688, g1,c26684, g1,c19311, g1,c11792, g1,c25731, g1,c1966, g1,c22015, g1,c17117, g1,c18370, g1,c22643, g1,c22416, g4,c25889, g1,c18303, g1,c22170, g3,c18074, g1,c25925, g1,c26628, g1,c39084, g1,c19566, g1,c21364, g2,c23030, g1,c22009, g1,c10710, g1,c23152, g1,c18044, g1,c21721, g1,c19993, g1,c19812, g2,c15972, g1
GO:0016137	glycoside metabolic process	biological process	1	1	291	48	21672	c20511, g1
GO:0016138	glycoside biosynthetic process	biological process	1	1	291	48	21672	c20511, g1
GO:0019872	streptomycin biosynthetic process	biological process	1	1	291	48	21672	c20511, g1
GO:0030647	aminoglycoside antibiotic metabolic process	biological process	1	1	291	48	21672	c20511, g1
GO:0030648	aminoglycoside antibiotic biosynthetic process	biological process	1	1	291	48	21672	c20511, g1
GO:0046173	polyol biosynthetic process	biological process	1	1	291	48	21672	c20511, g1
GO:0046343	streptomycin metabolic process	biological process	1	1	291	48	21672	c20511, g1
GO:0010648	negative regulation of cell communication	biological process	1	1	291	48	21672	c24337, g1
GO:0004518	nuclease activity	molecular function	1	4	291	229	21672	c18517, g1,c26451, g1,c24773, g1,c21769, g1
GO:0006555	methionine metabolic process	biological process	1	1	291	78	21672	c22258, g1
GO:0006396	RNA processing	biological process	1	9	291	568	21672	c18517, g1,c23405, g1,c18594, g1,c21769, g1,c20495, g1,c22936, g1,c23018, g1,c23637, g1,c23301, g1
GO:0044764	multi-organism cellular process	biological process	1	8	291	480	21672	c22943, g1,c22168, g1,c22893, g1,c18353, g1,c26451, g1,c21879, g1,c20952, g1,c25880, g2
GO:0009067	aspartate family amino acid biosynthetic process	biological process	1	1	291	61	21672	c24608, g1
GO:0009117	nucleotide metabolic process	biological process	1	14	291	1058	21672	c23406, g1,c21840, g1,c22122, g1,c25925, g1,c25731, g1,c15972, g1,c24705, g1,c24684, g1,c23404, g1,c20511, g1,c19566, g4,c25710, g1,c22416, g4,c25889, g1
GO:0016485	protein processing	biological process	1	1	291	54	21672	c19549, g1
GO:0051604	protein maturation	biological process	1	1	291	54	21672	c19549, g1
GO:0003854	3-beta-hydroxy-delta5-steroid dehydrogenase activity	molecular function	1	1	291	48	21672	c22006, g1
GO:0008207	C21-steroid hormone metabolic process	biological process	1	1	291	48	21672	c22006, g1
GO:0016229	steroid dehydrogenase activity	molecular function	1	1	291	48	21672	c22006, g1
GO:0033764	steroid dehydrogenase activity, acting on the CH-OH group of donors, NAD or NADP as acceptor	molecular function	1	1	291	48	21672	c22006, g1
GO:0048585	negative regulation of response to stimulus	biological process	1	1	291	52	21672	c24337, g1
GO:0008209	androgen metabolic process	biological process	1	1	291	49	21672	c22006, g1
GO:0008210	estrogen metabolic process	biological process	1	1	291	49	21672	c22006, g1
GO:0043604	amide biosynthetic process	biological process	1	2	291	107	21672	c25467, g1,c22122, g1
GO:0005911	cell-cell junction	cellular component	1	1	291	45	21672	c22416, g4
GO:0009144	purine nucleoside triphosphate metabolic process	biological process	1	9	291	685	21672	c25889, g1,c23404, g1,c24705, g1,c25731, g1,c15972, g1,c24684, g1,c25925, g1,c23406, g1,c21840, g1
GO:0009205	purine ribonucleoside triphosphate metabolic process	biological process	1	9	291	685	21672	c21840, g1,c23406, g1,c25925, g1,c24705, g1,c25731, g1,c15972, g1,c24684, g1,c23404, g1,c25889, g1
GO:0051188	cofactor biosynthetic process	biological process	1	7	291	474	21672	c25838, g1,c26330, g1,c21769, g1,c23637, g1,c22122, g1,c25016, g1,c22258, g1
GO:0033036	macromolecule localization	biological process	1	15	291	995	21672	c27060, g1,c26939, g1,c18256, g1,c21006, g1,c21838, g1,c22487, g1,c17485, g1,c21840, g1,c19367, g1,c21198, g1,c19609, g1,c1966, g1,c23989, g1,c12304, g1,c21343, g1
GO:0019362	pyridine nucleotide metabolic process	biological process	1	2	291	166	21672	c22122, g1,c25710, g1
GO:0009199	ribonucleoside triphosphate metabolic process	biological process	1	9	291	686	21672	c25925, g1,c25731, g1,c15972, g1,c24705, g1,c24684, g1,c21840, g1,c23406, g1,c25889, g1,c23404, g1
GO:0006779	porphyrin-containing compound biosynthetic process	biological process	1	3	291	171	21672	c23637, g1,c26330, g1,c21769, g1
GO:0009259	ribonucleotide metabolic process	biological process	1	10	291	762	21672	c23406, g1,c21840, g1,c24684, g1,c24705, g1,c25731, g1,c15972, g1,c25925, g1,c23404, g1,c25889, g1,c22416, g4
GO:0019693	ribose phosphate metabolic process	biological process	1	10	291	762	21672	c24684, g1,c25731, g1,c24705, g1,c15972, g1,c25925, g1,c23406, g1,c21840, g1,c25889, g1,c22416, g4,c23404, g1
GO:0061025	membrane fusion	biological process	1	1	291	59	21672	c22168, g1
GO:0005856	cytoskeleton	cellular component	1	7	291	523	21672	c23030, g1,c15972, g1,c25731, g1,c19566, g1,c39084, g1,c20100, g1,c23404, g1
GO:0046500	S-adenosylmethionine metabolic process	biological process	1	1	291	54	21672	c22258, g1
GO:0009082	branched-chain amino acid biosynthetic process	biological process	1	1	291	66	21672	c22122, g1
GO:0042278	purine nucleoside metabolic process	biological process	1	11	291	819	21672	c23404, g1,c25889, g1,c23406, g1,c21840, g1,c23405, g1,c22258, g1,c25731, g1,c15972, g1,c24705, g1,c24684, g1,c25925, g1
GO:0046128	purine ribonucleoside metabolic process	biological process	1	11	291	819	21672	c15972, g1,c25731, g1,c24705, g1,c24684, g1,c25925, g1,c23406, g1,c21840, g1,c23405, g1,c22258, g1,c25889, g1,c23404, g1
GO:0034754	cellular hormone metabolic process	biological process	1	1	291	53	21672	c22006, g1
GO:0042445	hormone metabolic process	biological process	1	1	291	54	21672	c22006, g1
GO:0007010	cytoskeleton organization	biological process	1	3	291	236	21672	c22568, g1,c20430, g1,c23030, g1
GO:0019843	rRNA binding	molecular function	1	1	291	94	21672	c20180, g2
GO:0010817	regulation of hormone levels	biological process	1	1	291	55	21672	c22006, g1
GO:0004175	endopeptidase activity	molecular function	1	10	291	683	21672	c21865, g1,c26623, g1,c25783, g1,c1974, g1,c23406, g1,c6643, g1,c21896, g1,c1992, g1,c23357, g1,c25528, g1
GO:0016830	carbon-carbon lyase activity	molecular function	1	3	291	242	21672	c22813, g1,c23751, g1,c9941, g2
GO:0008375	acetylglucosaminyltransferase activity	molecular function	1	1	291	51	21672	c20522, g1
GO:0008283	cell proliferation	biological process	1	1	291	65	21672	c20100, g1
GO:0051287	NAD binding	molecular function	1	2	291	164	21672	c22122, g1,c24608, g1
GO:0030117	membrane coat	cellular component	1	2	291	126	21672	c21838, g1,c17485, g1
GO:0048475	coated membrane	cellular component	1	2	291	126	21672	c17485, g1,c21838, g1
GO:0043623	cellular protein complex assembly	biological process	1	3	291	241	21672	c15972, g1,c23404, g1,c21343, g1
GO:0006066	alcohol metabolic process	biological process	1	2	291	156	21672	c20511, g1,c22737, g1
GO:0031967	organelle envelope	cellular component	1	7	291	568	21672	c47020, g1,c27060, g1,c42901, g1,c24634, g1,c17572, g1,c31140, g1,c24634, g2
GO:0003743	translation initiation factor activity	molecular function	1	2	291	175	21672	c11792, g1,c22643, g1
GO:0030203	glycosaminoglycan metabolic process	biological process	1	1	291	65	21672	c20300, g1
GO:0048468	cell development	biological process	1	1	291	68	21672	c17117, g1
GO:0006753	nucleoside phosphate metabolic process	biological process	1	14	291	1077	21672	c23404, g1,c19566, g4,c20511, g1,c25710, g1,c22416, g4,c25889, g1,c21840, g1,c23406, g1,c22122, g1,c25925, g1,c24705, g1,c25731, g1,c15972, g1,c24684, g1
GO:0048646	anatomical structure formation involved in morphogenesis	biological process	1	1	291	66	21672	c17117, g1
GO:0008200	ion channel inhibitor activity	molecular function	1	1	291	73	21672	c21721, g1
GO:0016248	channel inhibitor activity	molecular function	1	1	291	73	21672	c21721, g1
GO:0003724	RNA helicase activity	molecular function	1	2	291	102	21672	c23406, g1,c25925, g1
GO:0010608	posttranscriptional regulation of gene expression	biological process	1	4	291	354	21672	c25889, g1,c19812, g2,c11792, g1,c22643, g1
GO:0032501	multicellular organismal process	biological process	1	11	291	783	21672	c16663, g1,c22456, g1,c21840, g1,c23089, g3,c19342, g1,c26955, g1,c24337, g1,c25050, g1,c17117, g1,c23763, g1,c23989, g1
GO:0009119	ribonucleoside metabolic process	biological process	1	11	291	835	21672	c22258, g1,c23405, g1,c21840, g1,c23406, g1,c25925, g1,c24684, g1,c15972, g1,c25731, g1,c24705, g1,c23404, g1,c25889, g1
GO:0044281	small molecule metabolic process	biological process	1	44	291	3276	21672	c20300, g1,c21629, g1,c26955, g1,c9941, g2,c25090, g1,c23400, g1,c22258, g1,c23405, g1,c22813, g1,c26330, g1,c24705, g1,c17400, g1,c19631, g1,c19566, g4,c25356, g1,c22737, g1,c16769, g1,c21840, g1,c25467, g1,c15972, g1,c24852, g1,c21838, g1,c20511, g1,c23404, g1,c21108, g1,c25710, g1,c23406, g1,c22893, g1,c24684, g1,c25731, g1,c25253, g2,c21280, g1,c25253, g1,c22943, g1,c25016, g1,c1966, g1,c2588…
GO:0006446	regulation of translational initiation	biological process	1	2	291	183	21672	c22643, g1,c11792, g1
GO:0015171	amino acid transmembrane transporter activity	molecular function	1	1	291	73	21672	c23540, g1
GO:0032502	developmental process	biological process	1	9	291	638	21672	c16663, g1,c22816, g1,c21840, g1,c19342, g1,c26955, g1,c24337, g1,c25950, g1,c23989, g1,c17117, g1
GO:0072524	pyridine-containing compound metabolic process	biological process	1	2	291	178	21672	c22122, g1,c25710, g1
GO:0051536	iron-sulfur cluster binding	molecular function	1	2	291	186	21672	c26451, g1,c21289, g1
GO:0051540	metal cluster binding	molecular function	1	2	291	186	21672	c21289, g1,c26451, g1
GO:0009888	tissue development	biological process	1	1	291	55	21672	c21840, g1
GO:0008092	cytoskeletal protein binding	molecular function	1	4	291	287	21672	c20430, g1,c22568, g1,c20100, g1,c23030, g1
GO:0016032	viral process	biological process	1	7	291	428	21672	c18353, g1,c22943, g1,c26451, g1,c22893, g1,c22168, g1,c20952, g1,c21879, g1
GO:0006783	heme biosynthetic process	biological process	1	1	291	60	21672	c23637, g1
GO:0006898	receptor-mediated endocytosis	biological process	1	1	291	65	21672	c23989, g1
GO:0005882	intermediate filament	cellular component	1	1	291	58	21672	c25731, g1
GO:0006413	translational initiation	biological process	1	2	291	189	21672	c11792, g1,c22643, g1
GO:0045111	intermediate filament cytoskeleton	cellular component	1	1	291	59	21672	c25731, g1
GO:0016044	cellular membrane organization	biological process	1	1	291	76	21672	c27060, g1
GO:0051301	cell division	biological process	1	2	291	156	21672	c31140, g1,c25925, g1
GO:0030030	cell projection organization	biological process	1	1	291	61	21672	c26628, g1
GO:0007606	sensory perception of chemical stimulus	biological process	1	1	291	83	21672	c25050, g1
GO:0040011	locomotion	biological process	1	4	291	290	21672	c19342, g1,c21879, g1,c22168, g1,c23989, g1
GO:0043531	ADP binding	molecular function	1	1	291	56	21672	c23406, g1
GO:0006664	glycolipid metabolic process	biological process	1	2	291	120	21672	c11792, g1,c31549, g1
GO:0016779	nucleotidyltransferase activity	molecular function	1	7	291	497	21672	c26451, g1,c23406, g1,c22926, g1,c20430, g1,c25050, g1,c1966, g1,c26955, g1
GO:0006325	chromatin organization	biological process	1	2	291	164	21672	c26684, g1,c22015, g1
GO:0031975	envelope	cellular component	1	7	291	597	21672	c17572, g1,c24634, g2,c31140, g1,c27060, g1,c47020, g1,c24634, g1,c42901, g1
GO:0007017	microtubule-based process	biological process	1	2	291	165	21672	c23404, g1,c15972, g1
GO:0030312	external encapsulating structure	cellular component	1	1	291	104	21672	c17117, g1
GO:0042168	heme metabolic process	biological process	1	1	291	64	21672	c23637, g1
GO:0016836	hydro-lyase activity	molecular function	1	1	291	103	21672	c17400, g1
GO:0044454	nuclear chromosome part	cellular component	1	1	291	69	21672	c10710, g1
GO:0007276	gamete generation	biological process	1	1	291	77	21672	c17117, g1
GO:0005794	Golgi apparatus	cellular component	1	2	291	136	21672	c20522, g1,c17485, g1
GO:0030674	protein binding, bridging	molecular function	1	1	291	72	21672	c20100, g1
GO:0060090	binding, bridging	molecular function	1	1	291	72	21672	c20100, g1
GO:1901657	glycosyl compound metabolic process	biological process	1	12	291	932	21672	c23405, g1,c22258, g1,c23406, g1,c21840, g1,c25925, g1,c25731, g1,c15972, g1,c24705, g1,c24684, g1,c23404, g1,c20511, g1,c25889, g1
GO:0016298	lipase activity	molecular function	1	1	291	56	21672	c26197, g1
GO:1901615	organic hydroxy compound metabolic process	biological process	1	2	291	168	21672	c22737, g1,c20511, g1
GO:0032318	regulation of Ras GTPase activity	biological process	1	1	291	48	21672	c25731, g1
GO:0051213	dioxygenase activity	molecular function	1	1	291	71	21672	c26401, g2
GO:0030258	lipid modification	biological process	1	1	291	64	21672	c23556, g1
GO:0042025	host cell nucleus	cellular component	1	1	291	69	21672	c21879, g1
GO:0019012	virion	cellular component	1	7	291	489	21672	c22168, g1,c19367, g1,c21879, g1,c21172, g1,c22943, g1,c10720, g1,c23089, g3
GO:0055080	cation homeostasis	biological process	1	1	291	74	21672	c38857, g1
GO:0050801	ion homeostasis	biological process	1	1	291	76	21672	c38857, g1
GO:0044723	single-organism carbohydrate metabolic process	biological process	1	12	291	893	21672	c31549, g1,c23005, g1,c20511, g1,c20522, g1,c25710, g1,c23751, g1,c21583, g1,c23556, g1,c22122, g1,c24177, g1,c24608, g1,c26628, g1
GO:0003333	amino acid transmembrane transport	biological process	1	1	291	77	21672	c23540, g1
GO:0072528	pyrimidine-containing compound biosynthetic process	biological process	1	1	291	73	21672	c22416, g4
GO:0007600	sensory perception	biological process	1	1	291	88	21672	c25050, g1
GO:0016310	phosphorylation	biological process	1	17	291	1259	21672	c25731, g1,c42901, g1,c25040, g1,c22308, g1,c25710, g1,c21198, g1,c23930, g1,c22053, g1,c17572, g1,c44009, g1,c21583, g1,c24876, g1,c31140, g1,c25375, g1,c21163, g1,c47020, g1,c23005, g1
GO:0016999	antibiotic metabolic process	biological process	1	1	291	58	21672	c20511, g1
GO:0017000	antibiotic biosynthetic process	biological process	1	1	291	58	21672	c20511, g1
GO:0017144	drug metabolic process	biological process	1	1	291	58	21672	c20511, g1
GO:0015085	calcium ion transmembrane transporter activity	molecular function	1	1	291	70	21672	c38857, g1
GO:0009108	coenzyme biosynthetic process	biological process	1	4	291	317	21672	c22258, g1,c25016, g1,c22122, g1,c25838, g1
GO:0004536	deoxyribonuclease activity	molecular function	1	1	291	69	21672	c24773, g1
GO:0009056	catabolic process	biological process	1	22	291	1713	21672	c24608, g1,c15972, g1,c25925, g1,c21840, g1,c22737, g1,c22122, g1,c24634, g2,c21880, g1,c26197, g1,c25889, g1,c2648, g1,c25356, g1,c23005, g1,c25016, g1,c24705, g1,c25731, g1,c24684, g1,c24773, g1,c25253, g2,c23400, g1,c25710, g1,c23404, g1
GO:0006643	membrane lipid metabolic process	biological process	1	2	291	131	21672	c11792, g1,c31549, g1
GO:0003774	motor activity	molecular function	1	2	291	172	21672	c20100, g1,c25731, g1
GO:0016757	transferase activity, transferring glycosyl groups	molecular function	1	6	291	438	21672	c23956, g1,c20522, g1,c24437, g1,c22179, g1,c23388, g1,c23556, g1
GO:0015931	nucleobase-containing compound transport	biological process	1	1	291	73	21672	c27060, g1
GO:0009116	nucleoside metabolic process	biological process	1	11	291	884	21672	c25889, g1,c23404, g1,c25925, g1,c24684, g1,c25731, g1,c15972, g1,c24705, g1,c22258, g1,c23405, g1,c23406, g1,c21840, g1
GO:0044767	single-organism developmental process	biological process	1	6	291	461	21672	c21840, g1,c22816, g1,c17117, g1,c23989, g1,c19342, g1,c25950, g1
GO:0019898	extrinsic to membrane	cellular component	1	1	291	69	21672	c23993, g1
GO:0005083	small GTPase regulator activity	molecular function	1	2	291	109	21672	c25731, g1,c24684, g1
GO:0003008	system process	biological process	1	2	291	151	21672	c23763, g1,c25050, g1
GO:0030036	actin cytoskeleton organization	biological process	1	1	291	99	21672	c23030, g1
GO:0007596	blood coagulation	biological process	1	1	291	78	21672	c22456, g1
GO:0065008	regulation of biological quality	biological process	1	8	291	597	21672	c22006, g1,c26939, g1,c20952, g1,c25880, g2,c22456, g1,c38857, g1,c23089, g3,c18353, g1
GO:0006865	amino acid transport	biological process	1	1	291	85	21672	c23540, g1
GO:0048878	chemical homeostasis	biological process	1	1	291	82	21672	c38857, g1
GO:0030029	actin filament-based process	biological process	1	1	291	101	21672	c23030, g1
GO:0006778	porphyrin-containing compound metabolic process	biological process	1	3	291	206	21672	c21769, g1,c26330, g1,c23637, g1
GO:0033124	regulation of GTP catabolic process	biological process	1	2	291	108	21672	c24684, g1,c25731, g1
GO:0043087	regulation of GTPase activity	biological process	1	2	291	108	21672	c25731, g1,c24684, g1
GO:0009150	purine ribonucleotide metabolic process	biological process	1	9	291	746	21672	c21840, g1,c23406, g1,c24705, g1,c25731, g1,c15972, g1,c24684, g1,c25925, g1,c23404, g1,c25889, g1
GO:0044444	cytoplasmic part	cellular component	1	39	291	3537	21672	c20180, g2,c25710, g1,c20522, g1,c21108, g1,c24634, g1,c11792, g1,c19311, g1,c24688, g1,c25889, g1,c22416, g4,c22643, g1,c47020, g1,c18370, g1,c17117, g1,c19549, g1,c18074, g1,c22170, g3,c22167, g1,c17485, g1,c31181, g1,c21364, g2,c17572, g1,c26330, g1,c42901, g1,c20317, g1,c23400, g1,c19993, g1,c21721, g1,c18044, g1,c23152, g1,c22009, g1,c10710, g1,c21343, g1,c20739, g1,c44009, g1,c19812, g2,c21…
GO:0007599	hemostasis	biological process	1	1	291	80	21672	c22456, g1
GO:0050817	coagulation	biological process	1	1	291	80	21672	c22456, g1
GO:0050878	regulation of body fluid levels	biological process	1	1	291	80	21672	c22456, g1
GO:0019058	viral infectious cycle	biological process	1	3	291	195	21672	c22893, g1,c22943, g1,c21879, g1
GO:0009893	positive regulation of metabolic process	biological process	1	2	291	203	21672	c18353, g1,c19812, g2
GO:0031325	positive regulation of cellular metabolic process	biological process	1	2	291	203	21672	c19812, g2,c18353, g1
GO:0071822	protein complex subunit organization	biological process	1	4	291	361	21672	c19812, g2,c15972, g1,c23404, g1,c21343, g1
GO:0007275	multicellular organismal development	biological process	1	6	291	467	21672	c23989, g1,c21840, g1,c24337, g1,c19342, g1,c26955, g1,c16663, g1
GO:0048610	cellular process involved in reproduction	biological process	1	2	291	156	21672	c22168, g1,c17117, g1
GO:0000096	sulfur amino acid metabolic process	biological process	1	1	291	106	21672	c22258, g1
GO:0070085	glycosylation	biological process	1	2	291	142	21672	c23556, g1,c20522, g1
GO:0051186	cofactor metabolic process	biological process	1	9	291	713	21672	c25710, g1,c23637, g1,c25016, g1,c21769, g1,c26330, g1,c25838, g1,c22258, g1,c23400, g1,c22122, g1
GO:0030880	RNA polymerase complex	cellular component	1	2	291	150	21672	c26955, g1,c23406, g1
GO:0055086	nucleobase-containing small molecule metabolic process	biological process	1	19	291	1503	21672	c19566, g4,c1966, g1,c25889, g1,c22416, g4,c22122, g1,c21840, g1,c15972, g1,c25925, g1,c20511, g1,c23404, g1,c26955, g1,c25710, g1,c23406, g1,c22258, g1,c23405, g1,c24684, g1,c26330, g1,c25731, g1,c24705, g1
GO:0009118	regulation of nucleoside metabolic process	biological process	1	2	291	117	21672	c24684, g1,c25731, g1
GO:0030811	regulation of nucleotide catabolic process	biological process	1	2	291	117	21672	c25731, g1,c24684, g1
GO:0033121	regulation of purine nucleotide catabolic process	biological process	1	2	291	117	21672	c25731, g1,c24684, g1
GO:1900542	regulation of purine nucleotide metabolic process	biological process	1	2	291	117	21672	c24684, g1,c25731, g1
GO:0004527	exonuclease activity	molecular function	1	1	291	67	21672	c26451, g1
GO:0007610	behavior	biological process	1	1	291	65	21672	c23089, g3
GO:0016482	cytoplasmic transport	biological process	1	3	291	261	21672	c21838, g1,c27060, g1,c21343, g1
GO:0006397	mRNA processing	biological process	1	2	291	162	21672	c20495, g1,c18517, g1
GO:0033647	host intracellular organelle	cellular component	1	1	291	75	21672	c21879, g1
GO:0033648	host intracellular membrane-bounded organelle	cellular component	1	1	291	75	21672	c21879, g1
GO:0048285	organelle fission	biological process	1	1	291	88	21672	c20317, g1
GO:0009066	aspartate family amino acid metabolic process	biological process	1	4	291	377	21672	c21880, g1,c24608, g1,c22258, g1,c25016, g1
GO:0044430	cytoskeletal part	cellular component	1	5	291	436	21672	c20100, g1,c23404, g1,c39084, g1,c25731, g1,c15972, g1
GO:0046983	protein dimerization activity	molecular function	1	3	291	265	21672	c23098, g1,c25889, g1,c25731, g1
GO:0006163	purine nucleotide metabolic process	biological process	1	9	291	768	21672	c25889, g1,c23404, g1,c25925, g1,c25731, g1,c24705, g1,c15972, g1,c24684, g1,c23406, g1,c21840, g1
GO:0006790	sulfur compound metabolic process	biological process	1	3	291	263	21672	c22258, g1,c25467, g1,c26330, g1
GO:0012505	endomembrane system	cellular component	1	5	291	393	21672	c20522, g1,c27060, g1,c21838, g1,c17485, g1,c19549, g1
GO:0016247	channel regulator activity	molecular function	1	1	291	89	21672	c21721, g1
GO:0015078	hydrogen ion transmembrane transporter activity	molecular function	1	6	291	572	21672	c31140, g1,c25375, g1,c17572, g1,c44009, g1,c42901, g1,c47020, g1
GO:0009523	photosystem II	cellular component	1	1	291	65	21672	c24852, g1
GO:0033014	tetrapyrrole biosynthetic process	biological process	1	3	291	221	21672	c23637, g1,c21769, g1,c26330, g1
GO:0006732	coenzyme metabolic process	biological process	1	6	291	522	21672	c25710, g1,c25838, g1,c22258, g1,c25016, g1,c23400, g1,c22122, g1
GO:0006140	regulation of nucleotide metabolic process	biological process	1	2	291	130	21672	c24684, g1,c25731, g1
GO:0016651	oxidoreductase activity, acting on NAD(P)H	molecular function	1	2	291	205	21672	c26451, g1,c23572, g1
GO:0015994	chlorophyll metabolic process	biological process	1	2	291	152	21672	c21769, g1,c26330, g1
GO:1901564	organonitrogen compound metabolic process	biological process	1	41	291	3117	21672	c20055, g1,c24852, g1,c15972, g1,c25467, g1,c24634, g2,c22737, g1,c21840, g1,c25356, g1,c19566, g4,c24705, g1,c26330, g1,c21769, g1,c23993, g1,c22258, g1,c23400, g1,c23405, g1,c24705, g3,c26955, g1,c23637, g1,c9941, g2,c20300, g1,c25925, g1,c25838, g1,c24608, g1,c22122, g1,c25889, g1,c22416, g4,c21880, g1,c19549, g1,c25016, g1,c1966, g1,c22943, g1,c25253, g2,c25253, g1,c11792, g1,c24684, g1,c2573…
GO:0016043	cellular component organization	biological process	1	15	291	1221	21672	c21343, g1,c23404, g1,c22015, g1,c22568, g1,c25950, g1,c22168, g1,c22816, g1,c26684, g1,c20317, g1,c20430, g1,c19812, g2,c26628, g1,c15972, g1,c27060, g1,c23030, g1
GO:0005179	hormone activity	molecular function	1	1	291	99	21672	c23089, g3
GO:0006000	fructose metabolic process	biological process	1	1	291	110	21672	c25710, g1
GO:0005085	guanyl-nucleotide exchange factor activity	molecular function	1	1	291	59	21672	c24684, g1
GO:0033646	host intracellular part	cellular component	1	1	291	79	21672	c21879, g1
GO:0043656	intracellular region of host	cellular component	1	1	291	79	21672	c21879, g1
GO:0044423	virion part	cellular component	1	6	291	457	21672	c21172, g1,c23089, g3,c22943, g1,c21879, g1,c19367, g1,c22168, g1
GO:0006308	DNA catabolic process	biological process	1	1	291	83	21672	c24773, g1
GO:0044085	cellular component biogenesis	biological process	1	20	291	2102	21672	c22170, g3,c18074, g1,c18594, g1,c15972, g1,c17117, g1,c21343, g1,c21721, g1,c19993, g1,c23152, g1,c18044, g1,c22416, g4,c22009, g1,c10710, g1,c18370, g1,c19311, g1,c24688, g1,c21364, g2,c20300, g1,c23404, g1,c20180, g2
GO:0044702	single organism reproductive process	biological process	1	1	291	94	21672	c17117, g1
GO:0019028	viral capsid	cellular component	1	3	291	268	21672	c22943, g1,c19367, g1,c21879, g1
GO:0006897	endocytosis	biological process	1	1	291	98	21672	c23989, g1
GO:0009605	response to external stimulus	biological process	1	1	291	97	21672	c22456, g1
GO:0072527	pyrimidine-containing compound metabolic process	biological process	1	3	291	276	21672	c1966, g1,c19566, g4,c22416, g4
GO:0006461	protein complex assembly	biological process	1	3	291	296	21672	c23404, g1,c21343, g1,c15972, g1
GO:0070271	protein complex biogenesis	biological process	1	3	291	296	21672	c15972, g1,c23404, g1,c21343, g1
GO:0009058	biosynthetic process	biological process	1	78	291	6124	21672	c31549, g1,c21108, g1,c24337, g1,c25710, g1,c24688, g1,c11792, g1,c25016, g1,c1966, g1,c21880, g1,c26197, g1,c23018, g1,c26451, g1,c18074, g1,c22167, g1,c15875, g1,c24608, g1,c25925, g1,c21629, g1,c24222, g1,c25090, g1,c22813, g1,c21769, g1,c26330, g1,c23005, g1,c21721, g1,c19993, g1,c23301, g1,c22737, g1,c21838, g1,c19812, g2,c16714, g1,c20511, g1,c20180, g2,c20522, g1,c23751, g1,c19311, g1,c183…
GO:0005342	organic acid transmembrane transporter activity	molecular function	1	1	291	93	21672	c23540, g1
GO:0046943	carboxylic acid transmembrane transporter activity	molecular function	1	1	291	93	21672	c23540, g1
GO:0000228	nuclear chromosome	cellular component	1	1	291	87	21672	c10710, g1
GO:0015939	pantothenate metabolic process	biological process	1	1	291	79	21672	c22122, g1
GO:0015940	pantothenate biosynthetic process	biological process	1	1	291	79	21672	c22122, g1
GO:0009247	glycolipid biosynthetic process	biological process	1	1	291	74	21672	c31549, g1
GO:0046467	membrane lipid biosynthetic process	biological process	1	1	291	76	21672	c31549, g1
GO:0019067	viral assembly, maturation, egress, and release	biological process	1	1	291	85	21672	c21879, g1
GO:0042060	wound healing	biological process	1	1	291	91	21672	c22456, g1
GO:0051336	regulation of hydrolase activity	biological process	1	2	291	131	21672	c24684, g1,c25731, g1
GO:0034062	RNA polymerase activity	molecular function	1	3	291	264	21672	c26955, g1,c23406, g1,c1966, g1
GO:0006818	hydrogen transport	biological process	1	7	291	690	21672	c47020, g1,c44009, g1,c42901, g1,c17572, g1,c31140, g1,c23406, g1,c25375, g1
GO:0015992	proton transport	biological process	1	7	291	690	21672	c17572, g1,c25375, g1,c31140, g1,c23406, g1,c47020, g1,c44009, g1,c42901, g1
GO:0044707	single-multicellular organism process	biological process	1	9	291	730	21672	c16663, g1,c22456, g1,c21840, g1,c26955, g1,c19342, g1,c24337, g1,c25050, g1,c23989, g1,c23763, g1
GO:0008237	metallopeptidase activity	molecular function	1	3	291	221	21672	c25090, g1,c25528, g1,c26623, g1
GO:0008514	organic anion transmembrane transporter activity	molecular function	1	1	291	96	21672	c23540, g1
GO:0016879	ligase activity, forming carbon-nitrogen bonds	molecular function	1	4	291	383	21672	c25838, g1,c20300, g1,c25467, g1,c19609, g1
GO:0002119	nematode larval development	biological process	1	2	291	198	21672	c19342, g1,c23989, g1
GO:0002164	larval development	biological process	1	2	291	198	21672	c23989, g1,c19342, g1
GO:0006816	calcium ion transport	biological process	1	1	291	86	21672	c38857, g1
GO:0016071	mRNA metabolic process	biological process	1	2	291	179	21672	c18517, g1,c20495, g1
GO:0030054	cell junction	cellular component	1	1	291	80	21672	c22416, g4
GO:0006400	tRNA modification	biological process	1	1	291	77	21672	c23405, g1
GO:0006996	organelle organization	biological process	1	8	291	716	21672	c23030, g1,c27060, g1,c26684, g1,c20317, g1,c20430, g1,c21343, g1,c22015, g1,c22568, g1
GO:0033178	proton-transporting two-sector ATPase complex, catalytic domain	cellular component	1	1	291	127	21672	c23406, g1
GO:0017038	protein import	biological process	1	1	291	106	21672	c21343, g1
GO:0072521	purine-containing compound metabolic process	biological process	1	14	291	1180	21672	c25925, g1,c26330, g1,c15972, g1,c25731, g1,c24705, g1,c24684, g1,c23405, g1,c22258, g1,c23406, g1,c21840, g1,c26955, g1,c25889, g1,c1966, g1,c23404, g1
GO:0009521	photosystem	cellular component	1	1	291	83	21672	c24852, g1
GO:0033013	tetrapyrrole metabolic process	biological process	1	3	291	249	21672	c23637, g1,c26330, g1,c21769, g1
GO:0019953	sexual reproduction	biological process	1	1	291	108	21672	c17117, g1
GO:0052689	carboxylic ester hydrolase activity	molecular function	1	1	291	84	21672	c26197, g1
GO:0019751	polyol metabolic process	biological process	1	1	291	116	21672	c20511, g1
GO:0005096	GTPase activator activity	molecular function	1	1	291	75	21672	c25731, g1
GO:0048583	regulation of response to stimulus	biological process	1	3	291	207	21672	c25731, g1,c24337, g1,c22456, g1
GO:0009451	RNA modification	biological process	1	2	291	162	21672	c22416, g4,c23405, g1
GO:0035556	intracellular signal transduction	biological process	1	9	291	629	21672	c25889, g1,c26834, g1,c25880, g2,c25731, g1,c24705, g1,c25925, g1,c20055, g1,c21840, g1,c24705, g3
GO:0071702	organic substance transport	biological process	1	15	291	1161	21672	c19367, g1,c21198, g1,c19609, g1,c1966, g1,c12304, g1,c21343, g1,c26939, g1,c27060, g1,c18256, g1,c21006, g1,c21838, g1,c23540, g1,c22487, g1,c17485, g1,c21840, g1
GO:0009611	response to wounding	biological process	1	1	291	106	21672	c22456, g1
GO:0003723	RNA binding	molecular function	1	13	291	1153	21672	c25769, g1,c22643, g1,c21880, g1,c20180, g2,c22416, g4,c19993, g1,c25889, g1,c23406, g1,c19311, g1,c22170, g3,c25925, g1,c11792, g1,c19812, g2
GO:0034622	cellular macromolecular complex assembly	biological process	1	3	291	356	21672	c15972, g1,c21343, g1,c23404, g1
GO:0005737	cytoplasm	cellular component	1	48	291	4376	21672	c42901, g1,c26330, g1,c24177, g1,c23030, g1,c20317, g1,c23400, g1,c31181, g1,c21364, g2,c17572, g1,c19566, g1,c20739, g1,c21838, g1,c44009, g1,c15972, g1,c19812, g2,c22737, g1,c24634, g2,c31140, g1,c21721, g1,c19993, g1,c23152, g1,c18044, g1,c25356, g1,c10710, g1,c22009, g1,c21343, g1,c24684, g1,c24634, g1,c11792, g1,c19311, g1,c24688, g1,c20180, g2,c25710, g1,c20522, g1,c23404, g1,c21108, g1,c18…
GO:0006950	response to stress	biological process	1	11	291	931	21672	c25253, g1,c25253, g2,c22365, g1,c23171, g1,c21869, g1,c22456, g1,c18303, g1,c25824, g1,c16685, g1,c22063, g2,c22943, g1
GO:0006520	cellular amino acid metabolic process	biological process	1	17	291	1372	21672	c25889, g1,c21880, g1,c25356, g1,c22943, g1,c25016, g1,c25838, g1,c24852, g1,c24608, g1,c22122, g1,c25467, g1,c9941, g2,c20300, g1,c25253, g2,c25253, g1,c23400, g1,c22258, g1,c22893, g1
GO:0007059	chromosome segregation	biological process	1	1	291	100	21672	c25925, g1
GO:0051128	regulation of cellular component organization	biological process	1	1	291	127	21672	c19812, g2
GO:0042802	identical protein binding	molecular function	1	1	291	118	21672	c25783, g1
GO:0015630	microtubule cytoskeleton	cellular component	1	2	291	213	21672	c15972, g1,c23404, g1
GO:0005694	chromosome	cellular component	1	5	291	432	21672	c18303, g1,c26684, g1,c22015, g1,c10710, g1,c25925, g1
GO:0034357	photosynthetic membrane	cellular component	1	1	291	93	21672	c24852, g1
GO:0016021	integral to membrane	cellular component	1	43	291	3022	21672	c24634, g1,c22179, g1,c25731, g1,c11792, g1,c21551, g1,c18353, g1,c21172, g1,c22345, g1,c21896, g1,c20518, g1,c21198, g1,c25925, g1,c19409, g1,c38857, g1,c25859, g1,c15359, g1,c23602, g1,c47020, g1,c23989, g1,c25361, g1,c22015, g1,c19549, g1,c24683, g1,c25050, g1,c22357, g1,c17400, g1,c42901, g1,c26330, g1,c10720, g1,c20317, g1,c20597, g2,c31181, g1,c44009, g1,c21865, g1,c20952, g1,c24634, g2,c31…
GO:0022414	reproductive process	biological process	1	2	291	214	21672	c23089, g3,c17117, g1
GO:0009110	vitamin biosynthetic process	biological process	1	2	291	196	21672	c22122, g1,c25838, g1
GO:0042364	water-soluble vitamin biosynthetic process	biological process	1	2	291	196	21672	c25838, g1,c22122, g1
GO:0008194	UDP-glycosyltransferase activity	molecular function	1	1	291	109	21672	c20522, g1
GO:0006270	DNA replication initiation	biological process	1	1	291	112	21672	c25925, g1
GO:0004222	metalloendopeptidase activity	molecular function	1	2	291	171	21672	c25528, g1,c26623, g1
GO:0008654	phospholipid biosynthetic process	biological process	1	1	291	106	21672	c31549, g1
GO:0005215	transporter activity	molecular function	1	28	291	2098	21672	c17572, g1,c9941, g2,c21198, g1,c19367, g1,c23540, g1,c23406, g1,c18256, g1,c26939, g1,c26330, g1,c42901, g1,c24634, g1,c1966, g1,c22357, g1,c24150, g1,c24683, g1,c12304, g1,c47020, g1,c23602, g1,c15359, g1,c23517, g1,c25375, g1,c31140, g1,c25859, g1,c24634, g2,c38857, g1,c21861, g1,c21865, g1,c44009, g1
GO:0031301	integral to organelle membrane	cellular component	1	1	291	104	21672	c20317, g1
GO:0003006	developmental process involved in reproduction	biological process	1	1	291	129	21672	c17117, g1
GO:0019637	organophosphate metabolic process	biological process	1	15	291	1316	21672	c19566, g4,c20511, g1,c23404, g1,c31549, g1,c25889, g1,c22416, g4,c25710, g1,c22122, g1,c23406, g1,c21840, g1,c24684, g1,c15972, g1,c25731, g1,c24705, g1,c25925, g1
GO:0016835	carbon-oxygen lyase activity	molecular function	1	1	291	153	21672	c17400, g1
GO:0031224	intrinsic to membrane	cellular component	1	43	291	3033	21672	c23602, g1,c47020, g1,c23989, g1,c25361, g1,c22015, g1,c19549, g1,c25050, g1,c24683, g1,c22357, g1,c19409, g1,c25925, g1,c38857, g1,c25859, g1,c15359, g1,c20518, g1,c21896, g1,c21198, g1,c24634, g1,c22179, g1,c25731, g1,c11792, g1,c21551, g1,c18353, g1,c21172, g1,c22345, g1,c24313, g1,c19165, g1,c23301, g1,c21343, g1,c21613, g4,c44009, g1,c21865, g1,c20952, g1,c24634, g2,c25375, g1,c31140, g1,c31…
GO:0030154	cell differentiation	biological process	1	1	291	113	21672	c17117, g1
GO:0043167	ion binding	molecular function	1	80	291	6030	21672	c19631, g1,c16663, g1,c42901, g1,c24705, g1,c25880, g2,c19517, g1,c17785, g1,c10720, g1,c23637, g1,c31181, g1,c19566, g1,c39084, g1,c24789, g1,c25418, g1,c22384, g1,c24695, g1,c25467, g1,c25375, g1,c21840, g1,c25365, g1,c23956, g1,c21573, g1,c25528, g1,c19846, g1,c23370, g1,c21280, g1,c3262, g1,c18353, g1,c23406, g1,c23751, g1,c22288, g1,c21604, g1,c22936, g1,c20100, g1,c23404, g1,c25705, g1,c192…
GO:0006793	phosphorus metabolic process	biological process	1	32	291	2534	21672	c25889, g1,c22416, g4,c47020, g1,c25925, g1,c22122, g1,c24876, g1,c21583, g1,c25710, g1,c21198, g1,c20511, g1,c23404, g1,c31549, g1,c24684, g1,c25731, g1,c23406, g1,c25040, g1,c19566, g4,c23005, g1,c44009, g1,c15972, g1,c21163, g1,c31140, g1,c25375, g1,c21840, g1,c23930, g1,c17572, g1,c22053, g1,c24705, g1,c42901, g1,c22308, g1,c23400, g1,c14174, g1
GO:0006486	protein glycosylation	biological process	1	1	291	106	21672	c20522, g1
GO:0043413	macromolecule glycosylation	biological process	1	1	291	106	21672	c20522, g1
GO:0031300	intrinsic to organelle membrane	cellular component	1	1	291	105	21672	c20317, g1
GO:0048513	organ development	biological process	1	1	291	114	21672	c21840, g1
GO:0071705	nitrogen compound transport	biological process	1	2	291	221	21672	c23540, g1,c27060, g1
GO:0051276	chromosome organization	biological process	1	2	291	224	21672	c22015, g1,c26684, g1
GO:0007186	G-protein coupled receptor signaling pathway	biological process	1	6	291	436	21672	c21840, g1,c20597, g2,c23993, g1,c25050, g1,c22345, g1,c26330, g1
GO:0044427	chromosomal part	cellular component	1	4	291	373	21672	c25925, g1,c10710, g1,c22015, g1,c26684, g1
GO:0072511	divalent inorganic cation transport	biological process	1	2	291	177	21672	c38857, g1,c21865, g1
GO:0040009	regulation of growth rate	biological process	1	1	291	128	21672	c23238, g1
GO:0040010	positive regulation of growth rate	biological process	1	1	291	128	21672	c23238, g1
GO:0030695	GTPase regulator activity	molecular function	1	2	291	154	21672	c25731, g1,c24684, g1
GO:0072594	establishment of protein localization to organelle	biological process	1	1	291	119	21672	c21343, g1
GO:0005615	extracellular space	cellular component	1	1	291	137	21672	c15632, g1
GO:0006733	oxidoreduction coenzyme metabolic process	biological process	1	2	291	266	21672	c22122, g1,c25710, g1
GO:0010007	magnesium chelatase complex	cellular component	1	1	291	85	21672	c26330, g1
GO:0016851	magnesium chelatase activity	molecular function	1	1	291	85	21672	c26330, g1
GO:0051002	ligase activity, forming nitrogen-metal bonds	molecular function	1	1	291	85	21672	c26330, g1
GO:0051003	ligase activity, forming nitrogen-metal bonds, forming coordination complexes	molecular function	1	1	291	85	21672	c26330, g1
GO:0005635	nuclear envelope	cellular component	1	1	291	127	21672	c27060, g1
GO:0043933	macromolecular complex subunit organization	biological process	1	4	291	477	21672	c19812, g2,c15972, g1,c21343, g1,c23404, g1
GO:0015995	chlorophyll biosynthetic process	biological process	1	1	291	89	21672	c26330, g1
GO:0009100	glycoprotein metabolic process	biological process	1	1	291	112	21672	c20522, g1
GO:0009101	glycoprotein biosynthetic process	biological process	1	1	291	112	21672	c20522, g1
GO:0008047	enzyme activator activity	molecular function	1	1	291	99	21672	c25731, g1
GO:0006364	rRNA processing	biological process	1	1	291	112	21672	c18594, g1
GO:0016072	rRNA metabolic process	biological process	1	1	291	112	21672	c18594, g1
GO:0015849	organic acid transport	biological process	1	1	291	129	21672	c23540, g1
GO:0046942	carboxylic acid transport	biological process	1	1	291	129	21672	c23540, g1
GO:0048522	positive regulation of cellular process	biological process	1	2	291	262	21672	c19812, g2,c18353, g1
GO:0006796	phosphate-containing compound metabolic process	biological process	1	31	291	2499	21672	c22053, g1,c17572, g1,c31549, g1,c23404, g1,c20511, g1,c25710, g1,c21198, g1,c23930, g1,c14174, g1,c25040, g1,c23406, g1,c22308, g1,c42901, g1,c25731, g1,c24705, g1,c24684, g1,c23005, g1,c19566, g4,c47020, g1,c22416, g4,c25889, g1,c21583, g1,c24876, g1,c25375, g1,c31140, g1,c21840, g1,c21163, g1,c22122, g1,c25925, g1,c15972, g1,c44009, g1
GO:0008219	cell death	biological process	1	1	291	137	21672	c23468, g1
GO:0016265	death	biological process	1	1	291	137	21672	c23468, g1
GO:0044248	cellular catabolic process	biological process	1	15	291	1315	21672	c25016, g1,c23404, g1,c25356, g1,c21880, g1,c25889, g1,c23400, g1,c21840, g1,c24634, g2,c24773, g1,c25925, g1,c25253, g2,c24705, g1,c25731, g1,c15972, g1,c24684, g1
GO:0006099	tricarboxylic acid cycle	biological process	1	1	291	185	21672	c23751, g1
GO:0046578	regulation of Ras protein signal transduction	biological process	1	1	291	80	21672	c25731, g1
GO:0004930	G-protein coupled receptor activity	molecular function	1	3	291	228	21672	c20597, g2,c25050, g1,c22345, g1
GO:0048731	system development	biological process	1	1	291	125	21672	c21840, g1
GO:0006560	proline metabolic process	biological process	1	1	291	126	21672	c9941, g2
GO:0016042	lipid catabolic process	biological process	1	1	291	112	21672	c26197, g1
GO:0009579	thylakoid	cellular component	1	1	291	112	21672	c24852, g1
GO:0044436	thylakoid part	cellular component	1	1	291	112	21672	c24852, g1
GO:0071103	DNA conformation change	biological process	1	1	291	164	21672	c18303, g1
GO:0006144	purine nucleobase metabolic process	biological process	1	4	291	425	21672	c26955, g1,c26330, g1,c1966, g1,c23406, g1
GO:0006525	arginine metabolic process	biological process	1	1	291	128	21672	c9941, g2
GO:0045927	positive regulation of growth	biological process	1	1	291	141	21672	c23238, g1
GO:0007265	Ras protein signal transduction	biological process	1	1	291	86	21672	c25731, g1
GO:0042592	homeostatic process	biological process	1	2	291	254	21672	c38857, g1,c25880, g2
GO:0008270	zinc ion binding	molecular function	1	17	291	1358	21672	c10720, g1,c25090, g1,c18353, g1,c18517, g1,c17400, g1,c16663, g1,c3262, g1,c24337, g1,c18074, g1,c22737, g1,c15875, g1,c25418, g1,c26628, g1,c24789, g1,c23005, g1,c25769, g1,c26197, g1
GO:0006352	DNA-dependent transcription, initiation	biological process	1	1	291	149	21672	c22063, g1
GO:0048193	Golgi vesicle transport	biological process	1	1	291	129	21672	c21838, g1
GO:1901576	organic substance biosynthetic process	biological process	1	72	291	5958	21672	c15875, g1,c24608, g1,c25925, g1,c18074, g1,c26451, g1,c22167, g1,c26197, g1,c21880, g1,c23018, g1,c25016, g1,c1966, g1,c11792, g1,c24688, g1,c24337, g1,c25710, g1,c31549, g1,c21108, g1,c19812, g2,c21838, g1,c16714, g1,c22737, g1,c21721, g1,c19993, g1,c23301, g1,c23005, g1,c21769, g1,c26330, g1,c25090, g1,c24222, g1,c21629, g1,c25838, g1,c22170, g3,c22122, g1,c20430, g1,c21583, g1,c20884, g1,c258…
GO:0019867	outer membrane	cellular component	1	1	291	154	21672	c23468, g1
GO:0044434	chloroplast part	cellular component	1	1	291	112	21672	c26330, g1
GO:0044435	plastid part	cellular component	1	1	291	112	21672	c26330, g1
GO:0015979	photosynthesis	biological process	1	2	291	192	21672	c24852, g1,c26330, g1
GO:0050877	neurological system process	biological process	1	1	291	135	21672	c25050, g1
GO:0065003	macromolecular complex assembly	biological process	1	3	291	408	21672	c23404, g1,c21343, g1,c15972, g1
GO:0040008	regulation of growth	biological process	1	1	291	150	21672	c23238, g1
GO:0006261	DNA-dependent DNA replication	biological process	1	1	291	143	21672	c25925, g1
GO:0016311	dephosphorylation	biological process	1	1	291	116	21672	c14174, g1
GO:0015711	organic anion transport	biological process	1	1	291	144	21672	c23540, g1
GO:0000287	magnesium ion binding	molecular function	1	1	291	147	21672	c23704, g1
GO:0006260	DNA replication	biological process	1	4	291	397	21672	c10710, g1,c25925, g1,c20430, g1,c26451, g1
GO:0003678	DNA helicase activity	molecular function	1	1	291	111	21672	c25925, g1
GO:0015031	protein transport	biological process	1	9	291	816	21672	c21838, g1,c27060, g1,c21006, g1,c21840, g1,c17485, g1,c19367, g1,c21198, g1,c21343, g1,c19609, g1
GO:0045184	establishment of protein localization	biological process	1	9	291	816	21672	c21006, g1,c27060, g1,c21838, g1,c17485, g1,c21840, g1,c21198, g1,c19367, g1,c19609, g1,c21343, g1
GO:1901605	alpha-amino acid metabolic process	biological process	1	12	291	1115	21672	c22122, g1,c22258, g1,c23400, g1,c24608, g1,c25838, g1,c25253, g1,c25253, g2,c20300, g1,c25016, g1,c21880, g1,c9941, g2,c25356, g1
GO:0006766	vitamin metabolic process	biological process	1	2	291	241	21672	c22122, g1,c25838, g1
GO:0006767	water-soluble vitamin metabolic process	biological process	1	2	291	241	21672	c25838, g1,c22122, g1
GO:0007166	cell surface receptor signaling pathway	biological process	1	7	291	556	21672	c26330, g1,c24337, g1,c21840, g1,c20597, g2,c22345, g1,c23993, g1,c25050, g1
GO:0009966	regulation of signal transduction	biological process	1	2	291	184	21672	c24337, g1,c25731, g1
GO:0010646	regulation of cell communication	biological process	1	2	291	185	21672	c24337, g1,c25731, g1
GO:0005488	binding	molecular function	1	156	291	11549	21672	c23956, g1,c25365, g1,c21343, g1,c24789, g1,c24695, g1,c20828, g1,c21840, g1,c21163, g1,c31181, g1,c19566, g1,c22053, g1,c21997, g1,c19631, g1,c24705, g1,c25880, g2,c23639, g2,c19517, g1,c23993, g1,c21979, g1,c47020, g1,c46600, g1,c22943, g1,c23602, g2,c22015, g1,c21842, g1,c19212, g1,c25705, g1,c47202, g1,c25838, g1,c20430, g1,c23751, g1,c22288, g1,c22936, g1,c20511, g1,c25253, g1,c21289, g1,c23…
GO:0015077	monovalent inorganic cation transmembrane transporter activity	molecular function	1	7	291	746	21672	c17572, g1,c31140, g1,c25375, g1,c9941, g2,c47020, g1,c44009, g1,c42901, g1
GO:0044237	cellular metabolic process	biological process	1	126	291	10007	21672	c22893, g1,c23856, g1,c19311, g1,c23406, g1,c26684, g1,c18353, g1,c25253, g1,c21280, g1,c20511, g1,c23404, g1,c21198, g1,c23751, g1,c22288, g1,c20522, g1,c22936, g1,c20180, g2,c21583, g1,c20430, g1,c22122, g1,c22170, g3,c19212, g1,c25838, g1,c22365, g1,c17117, g1,c23602, g2,c22015, g1,c22943, g1,c47020, g1,c22643, g1,c18370, g1,c20884, g1,c25889, g1,c22416, g4,c22258, g1,c23400, g1,c22308, g1,c23…
GO:0031329	regulation of cellular catabolic process	biological process	1	2	291	229	21672	c25731, g1,c24684, g1
GO:0015081	sodium ion transmembrane transporter activity	molecular function	1	1	291	117	21672	c9941, g2
GO:0023051	regulation of signaling	biological process	1	2	291	187	21672	c25731, g1,c24337, g1
GO:0016758	transferase activity, transferring hexosyl groups	molecular function	1	3	291	337	21672	c23556, g1,c20522, g1,c22179, g1
GO:0015672	monovalent inorganic cation transport	biological process	1	8	291	880	21672	c9941, g2,c47020, g1,c17572, g1,c44009, g1,c42901, g1,c25375, g1,c31140, g1,c23406, g1
GO:0009507	chloroplast	cellular component	1	1	291	138	21672	c26330, g1
GO:0046915	transition metal ion transmembrane transporter activity	molecular function	1	1	291	121	21672	c21865, g1
GO:0040007	growth	biological process	1	2	291	277	21672	c23238, g1,c20100, g1
GO:0016881	acid-amino acid ligase activity	molecular function	1	2	291	281	21672	c19609, g1,c25467, g1
GO:1901566	organonitrogen compound biosynthetic process	biological process	1	12	291	1190	21672	c22258, g1,c25467, g1,c22122, g1,c25838, g1,c26330, g1,c24608, g1,c21769, g1,c25016, g1,c20300, g1,c23637, g1,c25889, g1,c22416, g4
GO:0033643	host cell part	cellular component	1	1	291	131	21672	c21879, g1
GO:0060589	nucleoside-triphosphatase regulator activity	molecular function	1	2	291	202	21672	c24684, g1,c25731, g1
GO:0009112	nucleobase metabolic process	biological process	1	4	291	470	21672	c26330, g1,c26955, g1,c23406, g1,c1966, g1
GO:0009536	plastid	cellular component	1	1	291	154	21672	c26330, g1
GO:0009894	regulation of catabolic process	biological process	1	2	291	239	21672	c25731, g1,c24684, g1
GO:0000041	transition metal ion transport	biological process	1	1	291	137	21672	c21865, g1
GO:0018995	host	cellular component	1	1	291	133	21672	c21879, g1
GO:0043245	extraorganismal space	cellular component	1	1	291	133	21672	c21879, g1
GO:0043657	host cell	cellular component	1	1	291	133	21672	c21879, g1
GO:0044215	other organism	cellular component	1	1	291	133	21672	c21879, g1
GO:0044216	other organism cell	cellular component	1	1	291	133	21672	c21879, g1
GO:0044217	other organism part	cellular component	1	1	291	133	21672	c21879, g1
GO:0016874	ligase activity	molecular function	1	7	291	740	21672	c19609, g1,c25467, g1,c20300, g1,c22943, g1,c22167, g1,c25838, g1,c26330, g1
GO:0048518	positive regulation of biological process	biological process	1	3	291	418	21672	c19812, g2,c18353, g1,c23238, g1
GO:0051056	regulation of small GTPase mediated signal transduction	biological process	1	1	291	103	21672	c25731, g1
GO:0016820	hydrolase activity, acting on acid anhydrides, catalyzing transmembrane movement of substances	molecular function	1	2	291	305	21672	c26330, g1,c23406, g1
GO:0005789	endoplasmic reticulum membrane	cellular component	1	1	291	154	21672	c19549, g1
GO:0042175	nuclear outer membrane-endoplasmic reticulum membrane network	cellular component	1	1	291	155	21672	c19549, g1
GO:0006468	protein phosphorylation	biological process	1	7	291	613	21672	c21583, g1,c25040, g1,c24876, g1,c22053, g1,c22308, g1,c21198, g1,c23930, g1
GO:0043414	macromolecule methylation	biological process	1	1	291	127	21672	c22416, g4
GO:0008509	anion transmembrane transporter activity	molecular function	1	1	291	157	21672	c23540, g1
GO:0036094	small molecule binding	molecular function	1	44	291	3813	21672	c23406, g1,c25040, g1,c24684, g1,c3262, g1,c20100, g1,c23404, g1,c21604, g1,c22936, g1,c25824, g1,c25710, g1,c23751, g1,c22122, g1,c26451, g1,c22167, g1,c21583, g1,c25838, g1,c24608, g1,c25925, g1,c22943, g1,c23704, g1,c24859, g1,c25889, g1,c23018, g1,c24705, g3,c25880, g2,c26330, g1,c24705, g1,c23942, g1,c19566, g1,c23637, g1,c21840, g1,c25375, g1,c24695, g1,c22384, g1,c25467, g1,c24852, g1,c159…
GO:0000166	nucleotide binding	molecular function	1	43	291	3739	21672	c22943, g1,c24859, g1,c25889, g1,c23018, g1,c26451, g1,c22122, g1,c22167, g1,c21583, g1,c25838, g1,c24608, g1,c25925, g1,c23404, g1,c20100, g1,c21604, g1,c22936, g1,c25824, g1,c23751, g1,c25710, g1,c23406, g1,c25040, g1,c24684, g1,c3262, g1,c23005, g1,c21573, g1,c25950, g1,c23572, g1,c25365, g1,c23301, g1,c21840, g1,c25375, g1,c24695, g1,c22384, g1,c25467, g1,c24852, g1,c15972, g1,c20055, g1,c239…
GO:1901265	nucleoside phosphate binding	molecular function	1	43	291	3739	21672	c25467, g1,c24695, g1,c22384, g1,c21840, g1,c25375, g1,c20055, g1,c24852, g1,c15972, g1,c21573, g1,c23005, g1,c23301, g1,c25365, g1,c23572, g1,c25950, g1,c24705, g3,c25880, g2,c26330, g1,c24705, g1,c19566, g1,c23942, g1,c23637, g1,c21583, g1,c22167, g1,c22122, g1,c26451, g1,c25925, g1,c24608, g1,c25838, g1,c24859, g1,c22943, g1,c23018, g1,c25889, g1,c25040, g1,c23406, g1,c3262, g1,c24684, g1,c201…
GO:0005657	replication fork	cellular component	1	1	291	137	21672	c25925, g1
GO:0004812	aminoacyl-tRNA ligase activity	molecular function	1	1	291	184	21672	c22943, g1
GO:0006418	tRNA aminoacylation for protein translation	biological process	1	1	291	185	21672	c22943, g1
GO:0015276	ligand-gated ion channel activity	molecular function	1	1	291	127	21672	c38857, g1
GO:0022834	ligand-gated channel activity	molecular function	1	1	291	127	21672	c38857, g1
GO:0004871	signal transducer activity	molecular function	1	9	291	723	21672	c26330, g1,c25731, g1,c23993, g1,c22345, g1,c21163, g1,c20597, g2,c21840, g1,c25050, g1,c23005, g1
GO:0060089	molecular transducer activity	molecular function	1	9	291	723	21672	c25050, g1,c23005, g1,c26330, g1,c25731, g1,c23993, g1,c22345, g1,c21163, g1,c20597, g2,c21840, g1
GO:0008104	protein localization	biological process	1	9	291	873	21672	c21343, g1,c19609, g1,c21198, g1,c19367, g1,c21840, g1,c17485, g1,c21838, g1,c21006, g1,c27060, g1
GO:0003899	DNA-directed RNA polymerase activity	molecular function	1	1	291	190	21672	c1966, g1
GO:0072509	divalent inorganic cation transmembrane transporter activity	molecular function	1	1	291	150	21672	c38857, g1
GO:0016875	ligase activity, forming carbon-oxygen bonds	molecular function	1	1	291	192	21672	c22943, g1
GO:0016876	ligase activity, forming aminoacyl-tRNA and related compounds	molecular function	1	1	291	192	21672	c22943, g1
GO:0043038	amino acid activation	biological process	1	1	291	193	21672	c22943, g1
GO:0043039	tRNA aminoacylation	biological process	1	1	291	193	21672	c22943, g1
GO:0006814	sodium ion transport	biological process	1	1	291	189	21672	c9941, g2
GO:0019725	cellular homeostasis	biological process	1	1	291	207	21672	c38857, g1
GO:0033692	cellular polysaccharide biosynthetic process	biological process	1	2	291	209	21672	c20511, g1,c21583, g1
GO:0005102	receptor binding	molecular function	1	2	291	295	21672	c20100, g1,c23089, g3
GO:0044425	membrane part	cellular component	1	49	291	3816	21672	c26330, g1,c42901, g1,c17400, g1,c20597, g2,c20317, g1,c10720, g1,c23993, g1,c31181, g1,c17572, g1,c21838, g1,c44009, g1,c24852, g1,c21865, g1,c20952, g1,c31140, g1,c25375, g1,c24634, g2,c19165, g1,c23301, g1,c24313, g1,c21343, g1,c21613, g4,c22179, g1,c25731, g1,c24634, g1,c21551, g1,c11792, g1,c23406, g1,c18353, g1,c22345, g1,c21172, g1,c21896, g1,c20518, g1,c21198, g1,c25925, g1,c19409, g1,c25…
GO:0046034	ATP metabolic process	biological process	1	2	291	367	21672	c25925, g1,c23406, g1
GO:0055085	transmembrane transport	biological process	1	16	291	1432	21672	c23540, g1,c23406, g1,c24773, g1,c24634, g1,c26330, g1,c9941, g2,c24781, g1,c15359, g1,c24634, g2,c25859, g1,c21865, g1,c24683, g1,c22357, g1,c21343, g1,c24313, g1,c23602, g1
GO:0000271	polysaccharide biosynthetic process	biological process	1	2	291	214	21672	c21583, g1,c20511, g1
GO:0009311	oligosaccharide metabolic process	biological process	1	1	291	221	21672	c31549, g1
GO:0019538	protein metabolic process	biological process	1	52	291	4672	21672	c21583, g1,c24876, g1,c22170, g3,c18074, g1,c22643, g1,c18370, g1,c23357, g1,c22416, g4,c26197, g1,c25889, g1,c19549, g1,c22943, g1,c17117, g1,c11792, g1,c25040, g1,c24688, g1,c23406, g1,c1974, g1,c15288, g1,c19311, g1,c20522, g1,c21198, g1,c20180, g2,c1992, g1,c21108, g1,c26623, g1,c25783, g1,c21838, g1,c21865, g1,c19812, g2,c39017, g1,c6643, g1,c22565, g1,c22001, g1,c2648, g1,c22009, g1,c10710,…
GO:0006310	DNA recombination	biological process	1	1	291	151	21672	c21997, g1
GO:0022890	inorganic cation transmembrane transporter activity	molecular function	1	9	291	946	21672	c9941, g2,c47020, g1,c17572, g1,c44009, g1,c42901, g1,c21865, g1,c38857, g1,c31140, g1,c25375, g1
GO:0033365	protein localization to organelle	biological process	1	1	291	196	21672	c21343, g1
GO:0006807	nitrogen compound metabolic process	biological process	1	76	291	5934	21672	c22737, g1,c16714, g1,c20055, g1,c24852, g1,c15972, g1,c21114, g1,c20495, g1,c23301, g1,c23405, g1,c24705, g3,c26330, g1,c21769, g1,c17400, g1,c9941, g2,c26955, g1,c22471, g1,c24222, g1,c26451, g1,c18303, g1,c25925, g1,c24608, g1,c18594, g1,c15875, g1,c1966, g1,c25016, g1,c19549, g1,c23018, g1,c21880, g1,c18517, g1,c24773, g1,c25253, g2,c11792, g1,c25731, g1,c24684, g1,c31549, g1,c25710, g1,c2216…
GO:0080090	regulation of primary metabolic process	biological process	1	25	291	2088	21672	c15875, g1,c19812, g2,c25418, g1,c16714, g1,c22808, g1,c24876, g1,c25889, g1,c20884, g1,c22643, g1,c22015, g1,c24684, g1,c25731, g1,c25880, g2,c21769, g1,c11792, g1,c22308, g1,c26684, g1,c18353, g1,c23856, g1,c18517, g1,c24337, g1,c24222, g1,c23930, g1,c21198, g1,c22053, g1
GO:0016791	phosphatase activity	molecular function	1	1	291	171	21672	c14174, g1
GO:0044249	cellular biosynthetic process	biological process	1	66	291	5724	21672	c22167, g1,c18074, g1,c26451, g1,c24608, g1,c15875, g1,c25925, g1,c1966, g1,c25016, g1,c21880, g1,c26197, g1,c23018, g1,c24688, g1,c11792, g1,c31549, g1,c21108, g1,c24337, g1,c19812, g2,c21838, g1,c16714, g1,c21721, g1,c19993, g1,c23301, g1,c25090, g1,c26330, g1,c21769, g1,c21629, g1,c24222, g1,c22170, g3,c22122, g1,c21583, g1,c20430, g1,c25838, g1,c22943, g1,c22015, g1,c17117, g1,c22416, g4,c258…
GO:0005261	cation channel activity	molecular function	1	1	291	173	21672	c38857, g1
GO:0032259	methylation	biological process	1	1	291	167	21672	c22416, g4
GO:0004872	receptor activity	molecular function	1	6	291	529	21672	c20518, g1,c25731, g1,c25050, g1,c22345, g1,c21163, g1,c20597, g2
GO:0070838	divalent metal ion transport	biological process	1	1	291	159	21672	c38857, g1
GO:0006886	intracellular protein transport	biological process	1	5	291	570	21672	c17485, g1,c21840, g1,c21343, g1,c27060, g1,c21838, g1
GO:0048523	negative regulation of cellular process	biological process	1	1	291	203	21672	c24337, g1
GO:0034637	cellular carbohydrate biosynthetic process	biological process	1	2	291	246	21672	c20511, g1,c21583, g1
GO:0015988	energy coupled proton transmembrane transport, against electrochemical gradient	biological process	1	1	291	218	21672	c23406, g1
GO:0015991	ATP hydrolysis coupled proton transport	biological process	1	1	291	218	21672	c23406, g1
GO:0044455	mitochondrial membrane part	cellular component	1	1	291	233	21672	c17572, g1
GO:0044432	endoplasmic reticulum part	cellular component	1	1	291	203	21672	c19549, g1
GO:0008289	lipid binding	molecular function	1	1	291	206	21672	c22487, g1
GO:0060255	regulation of macromolecule metabolic process	biological process	1	23	291	2014	21672	c22053, g1,c23930, g1,c24222, g1,c24337, g1,c21198, g1,c18353, g1,c26684, g1,c22308, g1,c23856, g1,c18517, g1,c21769, g1,c25880, g2,c11792, g1,c22015, g1,c25889, g1,c20884, g1,c22643, g1,c22808, g1,c24876, g1,c19812, g2,c25418, g1,c15875, g1,c16714, g1
GO:0008653	lipopolysaccharide metabolic process	biological process	1	1	291	132	21672	c21583, g1
GO:0009103	lipopolysaccharide biosynthetic process	biological process	1	1	291	132	21672	c21583, g1
GO:0006605	protein targeting	biological process	1	1	291	220	21672	c21343, g1
GO:0017111	nucleoside-triphosphatase activity	molecular function	1	14	291	1400	21672	c25889, g1,c23404, g1,c20100, g1,c26330, g1,c25880, g2,c15972, g1,c25731, g1,c24705, g1,c24684, g1,c25925, g1,c20055, g1,c23406, g1,c21840, g1,c24705, g3
GO:0031323	regulation of cellular metabolic process	biological process	1	25	291	2162	21672	c22053, g1,c21198, g1,c24222, g1,c24337, g1,c23930, g1,c23856, g1,c18517, g1,c22308, g1,c26684, g1,c18353, g1,c11792, g1,c24684, g1,c25880, g2,c25731, g1,c21769, g1,c22015, g1,c22643, g1,c25889, g1,c20884, g1,c24876, g1,c22808, g1,c16714, g1,c15875, g1,c25418, g1,c19812, g2
GO:0006810	transport	biological process	1	47	291	3832	21672	c25925, g1,c21861, g1,c17485, g1,c15359, g1,c23517, g1,c25859, g1,c38857, g1,c47020, g1,c23018, g1,c23602, g1,c22357, g1,c1966, g1,c24683, g1,c12304, g1,c23989, g1,c24773, g1,c26939, g1,c18256, g1,c24634, g1,c23540, g1,c23406, g1,c21198, g1,c24781, g1,c27060, g1,c44009, g1,c21865, g1,c21838, g1,c22487, g1,c25375, g1,c31140, g1,c21840, g1,c24634, g2,c19165, g1,c24313, g1,c21721, g1,c24150, g1,c213…
GO:0000003	reproduction	biological process	1	3	291	459	21672	c17117, g1,c23089, g3,c22168, g1
GO:0051234	establishment of localization	biological process	1	47	291	3836	21672	c23540, g1,c23406, g1,c18256, g1,c26939, g1,c24773, g1,c24634, g1,c21198, g1,c24781, g1,c23517, g1,c15359, g1,c17485, g1,c38857, g1,c25859, g1,c21861, g1,c25925, g1,c24683, g1,c1966, g1,c22357, g1,c23989, g1,c12304, g1,c23018, g1,c47020, g1,c23602, g1,c26530, g1,c23517, g2,c21879, g1,c21006, g1,c42901, g1,c26330, g1,c19609, g1,c17572, g1,c19367, g1,c9941, g2,c22487, g1,c24634, g2,c25375, g1,c3114…
GO:0006644	phospholipid metabolic process	biological process	1	1	291	190	21672	c31549, g1
GO:0010467	gene expression	biological process	1	45	291	4185	21672	c19311, g1,c26684, g1,c18353, g1,c24688, g1,c23856, g1,c18517, g1,c11792, g1,c24337, g1,c22936, g1,c20180, g2,c18074, g1,c22170, g3,c18594, g1,c15875, g1,c17117, g1,c22015, g1,c22943, g1,c19549, g1,c1966, g1,c25889, g1,c20884, g1,c22416, g4,c23018, g1,c22643, g1,c18370, g1,c23405, g1,c21769, g1,c25880, g2,c21364, g2,c24222, g1,c23637, g1,c22808, g1,c19812, g2,c25418, g1,c16714, g1,c24789, g1,c220…
GO:1901363	heterocyclic compound binding	molecular function	1	81	291	6779	21672	c19311, g1,c23406, g1,c18353, g1,c23856, g1,c25253, g1,c21280, g1,c3262, g1,c23404, g1,c20100, g1,c21604, g1,c20180, g2,c22936, g1,c23751, g1,c22122, g1,c22170, g3,c21583, g1,c20430, g1,c23786, g1,c25838, g1,c25705, g1,c22943, g1,c25769, g1,c20884, g1,c25889, g1,c22416, g4,c22643, g1,c47020, g1,c24705, g1,c42901, g1,c25880, g2,c21997, g1,c19566, g1,c23637, g1,c25375, g1,c22808, g1,c21840, g1,c246…
GO:0042626	ATPase activity, coupled to transmembrane movement of substances	molecular function	1	1	291	258	21672	c26330, g1
GO:0043492	ATPase activity, coupled to movement of substances	molecular function	1	1	291	258	21672	c26330, g1
GO:0070887	cellular response to chemical stimulus	biological process	1	1	291	188	21672	c25253, g2
GO:0097159	organic cyclic compound binding	molecular function	1	81	291	6795	21672	c19566, g1,c21997, g1,c23637, g1,c42901, g1,c24705, g1,c25880, g2,c25528, g1,c21573, g1,c25365, g1,c10710, g1,c25467, g1,c22384, g1,c24695, g1,c25375, g1,c22808, g1,c21840, g1,c24789, g1,c25418, g1,c20100, g1,c23404, g1,c23751, g1,c22936, g1,c20180, g2,c21604, g1,c23856, g1,c23406, g1,c18353, g1,c19311, g1,c3262, g1,c25253, g1,c21280, g1,c25769, g1,c22943, g1,c22643, g1,c47020, g1,c22416, g4,c258…
GO:0016462	pyrophosphatase activity	molecular function	1	14	291	1427	21672	c24705, g3,c23406, g1,c21840, g1,c20055, g1,c25925, g1,c24684, g1,c26330, g1,c25731, g1,c25880, g2,c24705, g1,c15972, g1,c23404, g1,c20100, g1,c25889, g1
GO:0006206	pyrimidine nucleobase metabolic process	biological process	1	1	291	247	21672	c1966, g1
GO:0005730	nucleolus	cellular component	1	1	291	271	21672	c1966, g1
GO:0043168	anion binding	molecular function	1	38	291	3428	21672	c23018, g1,c25889, g1,c23704, g1,c22943, g1,c25925, g1,c25838, g1,c21583, g1,c22167, g1,c23751, g1,c25710, g1,c22936, g1,c21604, g1,c23404, g1,c20100, g1,c24684, g1,c25040, g1,c23406, g1,c23956, g1,c23301, g1,c25365, g1,c23572, g1,c25950, g1,c21573, g1,c23005, g1,c20055, g1,c15972, g1,c25467, g1,c22384, g1,c21840, g1,c23637, g1,c19566, g1,c23942, g1,c25880, g2,c26330, g1,c24705, g1,c22813, g1,c17…
GO:0019222	regulation of metabolic process	biological process	1	26	291	2273	21672	c25783, g1,c16714, g1,c25418, g1,c19812, g2,c15875, g1,c24876, g1,c22808, g1,c22643, g1,c25889, g1,c20884, g1,c22015, g1,c11792, g1,c25731, g1,c25880, g2,c21769, g1,c24684, g1,c23856, g1,c18517, g1,c18353, g1,c26684, g1,c22308, g1,c21198, g1,c23930, g1,c24222, g1,c24337, g1,c22053, g1
GO:0004386	helicase activity	molecular function	1	3	291	342	21672	c25925, g1,c24684, g1,c23406, g1
GO:0022892	substrate-specific transporter activity	molecular function	1	17	291	1652	21672	c26939, g1,c18256, g1,c42901, g1,c23540, g1,c9941, g2,c21198, g1,c19367, g1,c17572, g1,c44009, g1,c21865, g1,c31140, g1,c25375, g1,c38857, g1,c47020, g1,c1966, g1,c24150, g1,c12304, g1
GO:0044459	plasma membrane part	cellular component	1	1	291	208	21672	c23993, g1
GO:0016817	hydrolase activity, acting on acid anhydrides	molecular function	1	15	291	1529	21672	c20100, g1,c23404, g1,c25889, g1,c24705, g3,c23406, g1,c19588, g1,c21840, g1,c20055, g1,c25925, g1,c24684, g1,c25731, g1,c26330, g1,c25880, g2,c15972, g1,c24705, g1
GO:0038023	signaling receptor activity	molecular function	1	5	291	504	21672	c20597, g2,c21163, g1,c22345, g1,c25050, g1,c25731, g1
GO:0008026	ATP-dependent helicase activity	molecular function	1	1	291	155	21672	c24684, g1
GO:0070035	purine NTP-dependent helicase activity	molecular function	1	1	291	155	21672	c24684, g1
GO:0015399	primary active transmembrane transporter activity	molecular function	1	1	291	281	21672	c26330, g1
GO:0015405	P-P-bond-hydrolysis-driven transmembrane transporter activity	molecular function	1	1	291	281	21672	c26330, g1
GO:0034613	cellular protein localization	biological process	1	5	291	630	21672	c21343, g1,c21840, g1,c17485, g1,c21838, g1,c27060, g1
GO:0070727	cellular macromolecule localization	biological process	1	5	291	630	21672	c27060, g1,c21838, g1,c17485, g1,c21343, g1,c21840, g1
GO:0016818	hydrolase activity, acting on acid anhydrides, in phosphorus-containing anhydrides	molecular function	1	14	291	1454	21672	c26330, g1,c25880, g2,c25731, g1,c15972, g1,c24705, g1,c24684, g1,c25925, g1,c20055, g1,c21840, g1,c23406, g1,c24705, g3,c25889, g1,c23404, g1,c20100, g1
GO:0006366	transcription from RNA polymerase II promoter	biological process	1	1	291	251	21672	c22063, g1
GO:0048519	negative regulation of biological process	biological process	1	1	291	247	21672	c24337, g1
GO:0005509	calcium ion binding	molecular function	1	2	291	345	21672	c26955, g1,c39084, g1
GO:0016740	transferase activity	molecular function	1	36	291	3084	21672	c25040, g1,c23406, g1,c25731, g1,c22179, g1,c21108, g1,c20522, g1,c25710, g1,c24437, g1,c20430, g1,c21583, g1,c26451, g1,c23556, g1,c26628, g1,c18594, g1,c25838, g1,c1966, g1,c25050, g1,c23018, g1,c26197, g1,c23388, g1,c23405, g1,c23400, g1,c22258, g1,c20317, g1,c24177, g1,c26330, g1,c26955, g1,c25941, g1,c21163, g1,c21585, g1,c20952, g1,c21838, g1,c23005, g1,c22926, g1,c23956, g1,c25950, g1
GO:0016192	vesicle-mediated transport	biological process	1	3	291	448	21672	c17485, g1,c23989, g1,c21838, g1
GO:0006820	anion transport	biological process	1	1	291	238	21672	c23540, g1
GO:0022607	cellular component assembly	biological process	1	3	291	577	21672	c21343, g1,c23404, g1,c15972, g1
GO:1901659	glycosyl compound biosynthetic process	biological process	1	2	291	440	21672	c20511, g1,c22258, g1
GO:0051179	localization	biological process	1	47	291	3946	21672	c21838, g1,c44009, g1,c21865, g1,c27060, g1,c24634, g2,c31140, g1,c21840, g1,c25375, g1,c22487, g1,c21721, g1,c24313, g1,c19165, g1,c21343, g1,c24150, g1,c42901, g1,c26330, g1,c21879, g1,c21006, g1,c23517, g2,c26530, g1,c19367, g1,c9941, g2,c19609, g1,c17572, g1,c25925, g1,c21861, g1,c38857, g1,c25859, g1,c23517, g1,c15359, g1,c17485, g1,c23602, g1,c23018, g1,c47020, g1,c23989, g1,c12304, g1,c246…
GO:0016788	hydrolase activity, acting on ester bonds	molecular function	1	6	291	700	21672	c21769, g1,c26197, g1,c24773, g1,c26451, g1,c14174, g1,c18517, g1
GO:0005886	plasma membrane	cellular component	1	2	291	383	21672	c26530, g1,c23993, g1
GO:0022836	gated channel activity	molecular function	1	1	291	204	21672	c38857, g1
GO:0022839	ion gated channel activity	molecular function	1	1	291	204	21672	c38857, g1
GO:0046486	glycerolipid metabolic process	biological process	1	1	291	234	21672	c26197, g1
GO:0016741	transferase activity, transferring one-carbon groups	molecular function	1	2	291	363	21672	c25941, g1,c18594, g1
GO:0042578	phosphoric ester hydrolase activity	molecular function	1	1	291	228	21672	c14174, g1
GO:0004888	transmembrane signaling receptor activity	molecular function	1	3	291	373	21672	c25050, g1,c22345, g1,c20597, g2
GO:0016853	isomerase activity	molecular function	1	1	291	325	21672	c18303, g1
GO:0009057	macromolecule catabolic process	biological process	1	3	291	518	21672	c24634, g2,c24773, g1,c2648, g1
GO:0071944	cell periphery	cellular component	1	3	291	534	21672	c17117, g1,c23993, g1,c26530, g1
GO:1901137	carbohydrate derivative biosynthetic process	biological process	1	7	291	857	21672	c21583, g1,c31549, g1,c22258, g1,c20300, g1,c20511, g1,c20522, g1,c22416, g4
GO:0044765	single-organism transport	biological process	1	32	291	2873	21672	c12304, g1,c1966, g1,c22357, g1,c24683, g1,c23602, g1,c47020, g1,c25859, g1,c38857, g1,c15359, g1,c23517, g1,c24781, g1,c23406, g1,c23540, g1,c24634, g1,c24773, g1,c18256, g1,c26939, g1,c21343, g1,c24150, g1,c24313, g1,c31140, g1,c25375, g1,c24634, g2,c22487, g1,c21838, g1,c44009, g1,c21865, g1,c27060, g1,c17572, g1,c9941, g2,c26330, g1,c42901, g1
GO:0044264	cellular polysaccharide metabolic process	biological process	1	2	291	344	21672	c20511, g1,c21583, g1
GO:0034645	cellular macromolecule biosynthetic process	biological process	1	46	291	4381	21672	c19993, g1,c21721, g1,c23152, g1,c18044, g1,c22009, g1,c10710, g1,c22063, g1,c21838, g1,c25418, g1,c19812, g2,c16714, g1,c24789, g1,c22808, g1,c24222, g1,c20300, g1,c21364, g2,c25880, g2,c23400, g1,c20884, g1,c25889, g1,c26197, g1,c22416, g4,c18370, g1,c22643, g1,c17117, g1,c22943, g1,c22015, g1,c1966, g1,c15875, g1,c25925, g1,c26451, g1,c22170, g3,c18074, g1,c21583, g1,c20430, g1,c24337, g1,c201…
GO:0007165	signal transduction	biological process	1	22	291	1862	21672	c25050, g1,c23005, g1,c26834, g1,c25889, g1,c21840, g1,c21163, g1,c23089, g3,c25925, g1,c20055, g1,c20100, g1,c26616, g1,c20518, g1,c24337, g1,c22345, g1,c23993, g1,c21421, g1,c20597, g2,c24705, g3,c25880, g2,c26330, g1,c24705, g1,c25731, g1
GO:0005976	polysaccharide metabolic process	biological process	1	2	291	362	21672	c20511, g1,c21583, g1
GO:0009059	macromolecule biosynthetic process	biological process	1	46	291	4412	21672	c25880, g2,c23400, g1,c24222, g1,c20300, g1,c21364, g2,c16714, g1,c24789, g1,c21838, g1,c25418, g1,c19812, g2,c22808, g1,c22009, g1,c10710, g1,c23152, g1,c18044, g1,c21721, g1,c19993, g1,c22063, g1,c11792, g1,c23856, g1,c24688, g1,c18353, g1,c26684, g1,c19311, g1,c20522, g1,c20180, g2,c24337, g1,c21108, g1,c20511, g1,c25925, g1,c15875, g1,c20430, g1,c21583, g1,c26451, g1,c22170, g3,c18074, g1,c18…
GO:0023052	signaling	biological process	1	22	291	1875	21672	c25925, g1,c20055, g1,c21840, g1,c23089, g3,c21163, g1,c25889, g1,c26834, g1,c23005, g1,c25050, g1,c26330, g1,c24705, g1,c25880, g2,c25731, g1,c21421, g1,c20597, g2,c24705, g3,c22345, g1,c23993, g1,c20518, g1,c24337, g1,c20100, g1,c26616, g1
GO:0044700	single organism signaling	biological process	1	22	291	1875	21672	c25889, g1,c25050, g1,c23005, g1,c26834, g1,c20055, g1,c25925, g1,c23089, g3,c21163, g1,c21840, g1,c24337, g1,c20518, g1,c26616, g1,c20100, g1,c25731, g1,c26330, g1,c25880, g2,c24705, g1,c23993, g1,c22345, g1,c24705, g3,c21421, g1,c20597, g2
GO:0030163	protein catabolic process	biological process	1	1	291	314	21672	c2648, g1
GO:0046907	intracellular transport	biological process	1	5	291	705	21672	c27060, g1,c21838, g1,c17485, g1,c21840, g1,c21343, g1
GO:0022857	transmembrane transporter activity	molecular function	1	18	291	1830	21672	c23602, g1,c47020, g1,c24683, g1,c22357, g1,c21865, g1,c44009, g1,c38857, g1,c25859, g1,c25375, g1,c31140, g1,c15359, g1,c23517, g1,c9941, g2,c17572, g1,c42901, g1,c26330, g1,c23406, g1,c23540, g1
GO:0046873	metal ion transmembrane transporter activity	molecular function	1	3	291	451	21672	c9941, g2,c21865, g1,c38857, g1
GO:0016772	transferase activity, transferring phosphorus-containing groups	molecular function	1	17	291	1663	21672	c25040, g1,c23406, g1,c25731, g1,c26330, g1,c25710, g1,c26955, g1,c20430, g1,c21583, g1,c26451, g1,c21163, g1,c26628, g1,c25838, g1,c1966, g1,c25050, g1,c22926, g1,c23005, g1,c25950, g1
GO:0008324	cation transmembrane transporter activity	molecular function	1	9	291	1108	21672	c9941, g2,c47020, g1,c17572, g1,c44009, g1,c42901, g1,c21865, g1,c25375, g1,c31140, g1,c38857, g1
GO:0016773	phosphotransferase activity, alcohol group as acceptor	molecular function	1	8	291	905	21672	c25950, g1,c25710, g1,c21163, g1,c21583, g1,c25040, g1,c26628, g1,c26330, g1,c25731, g1
GO:0050896	response to stimulus	biological process	1	33	291	2817	21672	c26834, g1,c23005, g1,c20055, g1,c23089, g3,c21163, g1,c21840, g1,c22456, g1,c22063, g2,c25880, g2,c26330, g1,c24705, g1,c24705, g3,c20597, g2,c23993, g1,c25889, g1,c22943, g1,c25050, g1,c22365, g1,c25925, g1,c18303, g1,c21869, g1,c24337, g1,c20518, g1,c16685, g1,c25824, g1,c26616, g1,c20100, g1,c23171, g1,c25731, g1,c25253, g2,c25253, g1,c21421, g1,c22345, g1
GO:0044262	cellular carbohydrate metabolic process	biological process	1	3	291	539	21672	c22122, g1,c20511, g1,c21583, g1
GO:0007154	cell communication	biological process	1	22	291	1921	21672	c25050, g1,c26834, g1,c23005, g1,c25889, g1,c23089, g3,c21163, g1,c21840, g1,c20055, g1,c25925, g1,c26616, g1,c20100, g1,c24337, g1,c20518, g1,c23993, g1,c22345, g1,c24705, g3,c21421, g1,c20597, g2,c24705, g1,c26330, g1,c25880, g2,c25731, g1
GO:0034641	cellular nitrogen compound metabolic process	biological process	1	59	291	5057	21672	c25880, g2,c26330, g1,c21769, g1,c24705, g1,c22258, g1,c23405, g1,c24705, g3,c26955, g1,c23637, g1,c24222, g1,c21997, g1,c24789, g1,c16714, g1,c20055, g1,c15972, g1,c25418, g1,c25467, g1,c22808, g1,c21840, g1,c25356, g1,c10710, g1,c23301, g1,c20495, g1,c22063, g1,c19566, g4,c25253, g1,c25253, g2,c24773, g1,c24684, g1,c25731, g1,c23856, g1,c18517, g1,c26684, g1,c18353, g1,c23406, g1,c25710, g1,c24…
GO:0033554	cellular response to stress	biological process	1	2	291	398	21672	c22365, g1,c25253, g2
GO:0006259	DNA metabolic process	biological process	1	8	291	997	21672	c22365, g1,c25925, g1,c24773, g1,c18303, g1,c26451, g1,c20430, g1,c10710, g1,c21997, g1
GO:0042451	purine nucleoside biosynthetic process	biological process	1	1	291	377	21672	c22258, g1
GO:0046129	purine ribonucleoside biosynthetic process	biological process	1	1	291	377	21672	c22258, g1
GO:0044699	single-organism process	biological process	1	86	291	6809	21672	c24150, g1,c23005, g1,c25950, g1,c21098, g1,c22456, g1,c23089, g3,c31140, g1,c20055, g1,c27060, g1,c19812, g2,c15972, g1,c21838, g1,c21865, g1,c17572, g1,c22568, g1,c26955, g1,c9941, g2,c23930, g1,c24705, g3,c20317, g1,c20597, g2,c26330, g1,c25050, g1,c1966, g1,c23989, g1,c24876, g1,c23517, g1,c17485, g1,c25859, g1,c25925, g1,c26628, g1,c26616, g1,c24337, g1,c20518, g1,c23540, g1,c21421, g1,c2525…
GO:0044763	single-organism cellular process	biological process	1	70	291	5549	21672	c23540, g1,c21421, g1,c25253, g2,c18256, g1,c23468, g1,c24773, g1,c25731, g1,c26616, g1,c24337, g1,c20518, g1,c24876, g1,c17485, g1,c25859, g1,c25925, g1,c26628, g1,c25050, g1,c24705, g3,c20597, g2,c20317, g1,c26330, g1,c22568, g1,c26955, g1,c9941, g2,c23930, g1,c22456, g1,c23089, g3,c31140, g1,c27060, g1,c20055, g1,c15972, g1,c21838, g1,c19812, g2,c21865, g1,c23005, g1,c21098, g1,c25950, g1,c223…
GO:0009987	cellular process	biological process	1	164	291	13148	21672	c23404, g1,c20100, g1,c21198, g1,c24781, g1,c20180, g2,c22345, g1,c22893, g1,c19311, g1,c18353, g1,c23406, g1,c21280, g1,c22357, g1,c22643, g1,c20884, g1,c25889, g1,c22416, g4,c23602, g1,c21583, g1,c22122, g1,c38857, g1,c22170, g3,c22365, g1,c23637, g1,c22308, g1,c23517, g2,c23030, g1,c42901, g1,c22926, g1,c25356, g1,c22009, g1,c10710, g1,c24313, g1,c22006, g1,c18044, g1,c25467, g1,c24634, g2,c22…
GO:0009163	nucleoside biosynthetic process	biological process	1	1	291	392	21672	c22258, g1
GO:0042455	ribonucleoside biosynthetic process	biological process	1	1	291	392	21672	c22258, g1
GO:0044424	intracellular part	cellular component	1	80	291	7415	21672	c20495, g1,c19993, g1,c21721, g1,c31140, g1,c22737, g1,c27060, g1,c16714, g1,c19812, g2,c15972, g1,c21838, g1,c24852, g1,c17572, g1,c26955, g1,c20317, g1,c21769, g1,c26330, g1,c1966, g1,c19549, g1,c17485, g1,c22167, g1,c26451, g1,c18303, g1,c18074, g1,c25925, g1,c26628, g1,c15875, g1,c21108, g1,c25710, g1,c24337, g1,c24688, g1,c21421, g1,c11792, g1,c25731, g1,c24684, g1,c21613, g4,c21343, g1,c220…
GO:0032991	macromolecular complex	cellular component	1	51	291	5227	21672	c23406, g1,c21421, g1,c19311, g1,c24688, g1,c25731, g1,c11792, g1,c20100, g1,c23404, g1,c21108, g1,c20180, g2,c25710, g1,c22167, g1,c26451, g1,c18074, g1,c22170, g3,c17485, g1,c20430, g1,c25925, g1,c17117, g1,c19549, g1,c22416, g4,c25889, g1,c22643, g1,c47020, g1,c18370, g1,c20425, g1,c23993, g1,c23400, g1,c42901, g1,c26330, g1,c21769, g1,c21364, g2,c39084, g1,c17572, g1,c26955, g1,c31140, g1,c25…
GO:0032553	ribonucleotide binding	molecular function	1	28	291	2876	21672	c25889, g1,c25950, g1,c23572, g1,c23018, g1,c22943, g1,c23005, g1,c21573, g1,c25838, g1,c15972, g1,c20055, g1,c25925, g1,c22167, g1,c21840, g1,c22384, g1,c21583, g1,c25467, g1,c23751, g1,c25710, g1,c23404, g1,c20100, g1,c19566, g1,c24684, g1,c25880, g2,c26330, g1,c24705, g1,c24705, g3,c23406, g1,c25040, g1
GO:0034220	ion transmembrane transport	biological process	1	3	291	642	21672	c9941, g2,c23406, g1,c23540, g1
GO:0044265	cellular macromolecule catabolic process	biological process	1	1	291	347	21672	c24773, g1
GO:0042221	response to chemical stimulus	biological process	1	1	291	318	21672	c25253, g2
GO:0043229	intracellular organelle	cellular component	1	62	291	6040	21672	c19311, g1,c26684, g1,c18353, g1,c24688, g1,c23856, g1,c24684, g1,c24634, g1,c25731, g1,c11792, g1,c20100, g1,c23404, g1,c24337, g1,c20180, g2,c20522, g1,c18074, g1,c22170, g3,c18303, g1,c21907, g1,c17485, g1,c15875, g1,c26628, g1,c25925, g1,c17117, g1,c22015, g1,c19549, g1,c1966, g1,c25889, g1,c22416, g4,c47020, g1,c18370, g1,c22643, g1,c20317, g1,c42901, g1,c26330, g1,c25880, g2,c23030, g1,c213…
GO:0003677	DNA binding	molecular function	1	19	291	1931	21672	c23005, g1,c1966, g1,c20884, g1,c23018, g1,c10710, g1,c18303, g1,c26451, g1,c20430, g1,c23786, g1,c25418, g1,c16714, g1,c24789, g1,c25925, g1,c21997, g1,c24222, g1,c17075, g1,c23856, g1,c24684, g1,c25880, g2
GO:0035639	purine ribonucleoside triphosphate binding	molecular function	1	27	291	2795	21672	c25925, g1,c20055, g1,c15972, g1,c25838, g1,c25467, g1,c22384, g1,c21583, g1,c21840, g1,c22167, g1,c23018, g1,c25950, g1,c25889, g1,c21573, g1,c23005, g1,c22943, g1,c26330, g1,c25880, g2,c24705, g1,c24684, g1,c25040, g1,c23406, g1,c24705, g3,c25710, g1,c23751, g1,c19566, g1,c23404, g1,c20100, g1
GO:0043226	organelle	cellular component	1	62	291	6042	21672	c20522, g1,c20180, g2,c24337, g1,c20100, g1,c23404, g1,c11792, g1,c25731, g1,c24634, g1,c24684, g1,c23856, g1,c24688, g1,c18353, g1,c26684, g1,c19311, g1,c18370, g1,c47020, g1,c22643, g1,c22416, g4,c25889, g1,c1966, g1,c19549, g1,c22015, g1,c17117, g1,c25925, g1,c26628, g1,c15875, g1,c21907, g1,c17485, g1,c18074, g1,c22170, g3,c18303, g1,c31181, g1,c19566, g1,c39084, g1,c17572, g1,c21364, g2,c230…
GO:0001883	purine nucleoside binding	molecular function	1	27	291	2803	21672	c23751, g1,c25710, g1,c23404, g1,c20100, g1,c19566, g1,c26330, g1,c25880, g2,c24705, g1,c24684, g1,c23406, g1,c24705, g3,c25040, g1,c25950, g1,c25889, g1,c23018, g1,c23005, g1,c22943, g1,c21573, g1,c15972, g1,c25838, g1,c25925, g1,c20055, g1,c21840, g1,c22167, g1,c25467, g1,c22384, g1,c21583, g1
GO:0032550	purine ribonucleoside binding	molecular function	1	27	291	2803	21672	c23406, g1,c24705, g3,c25040, g1,c26330, g1,c25880, g2,c24705, g1,c24684, g1,c23404, g1,c20100, g1,c19566, g1,c25710, g1,c23751, g1,c22167, g1,c21840, g1,c25467, g1,c22384, g1,c21583, g1,c15972, g1,c25838, g1,c25925, g1,c20055, g1,c23005, g1,c22943, g1,c21573, g1,c25950, g1,c25889, g1,c23018, g1
GO:0032555	purine ribonucleotide binding	molecular function	1	27	291	2805	21672	c23751, g1,c25710, g1,c23404, g1,c20100, g1,c19566, g1,c26330, g1,c25880, g2,c24705, g1,c24684, g1,c23406, g1,c24705, g3,c25040, g1,c25950, g1,c25889, g1,c23018, g1,c22943, g1,c23005, g1,c21573, g1,c15972, g1,c25838, g1,c25925, g1,c20055, g1,c21840, g1,c22167, g1,c25467, g1,c22384, g1,c21583, g1
GO:0032549	ribonucleoside binding	molecular function	1	27	291	2808	21672	c25838, g1,c15972, g1,c20055, g1,c25925, g1,c21840, g1,c22167, g1,c21583, g1,c22384, g1,c25467, g1,c25889, g1,c25950, g1,c23018, g1,c22943, g1,c23005, g1,c21573, g1,c24684, g1,c25880, g2,c26330, g1,c24705, g1,c24705, g3,c23406, g1,c25040, g1,c23751, g1,c25710, g1,c23404, g1,c20100, g1,c19566, g1
GO:0009260	ribonucleotide biosynthetic process	biological process	1	1	291	401	21672	c22416, g4
GO:0046390	ribose phosphate biosynthetic process	biological process	1	1	291	401	21672	c22416, g4
GO:0001882	nucleoside binding	molecular function	1	27	291	2818	21672	c25710, g1,c23751, g1,c23404, g1,c20100, g1,c19566, g1,c24705, g1,c26330, g1,c25880, g2,c24684, g1,c23406, g1,c24705, g3,c25040, g1,c25950, g1,c25889, g1,c23018, g1,c23005, g1,c22943, g1,c21573, g1,c15972, g1,c25838, g1,c25925, g1,c20055, g1,c21840, g1,c22167, g1,c25467, g1,c22384, g1,c21583, g1
GO:0005622	intracellular	cellular component	1	85	291	7863	21672	c20180, g2,c20522, g1,c23404, g1,c20100, g1,c24634, g1,c19311, g1,c26684, g1,c18353, g1,c23406, g1,c23856, g1,c25889, g1,c22416, g4,c47020, g1,c22643, g1,c18370, g1,c17117, g1,c22015, g1,c22943, g1,c38857, g1,c22170, g3,c20430, g1,c21907, g1,c31181, g1,c21364, g2,c19566, g1,c39084, g1,c42901, g1,c25880, g2,c24705, g1,c24177, g1,c23030, g1,c23993, g1,c23400, g1,c20425, g1,c23152, g1,c18044, g1,c25…
GO:0006812	cation transport	biological process	1	10	291	1352	21672	c44009, g1,c42901, g1,c21865, g1,c31140, g1,c23406, g1,c25375, g1,c38857, g1,c9941, g2,c47020, g1,c17572, g1
GO:0046483	heterocycle metabolic process	biological process	1	56	291	4996	21672	c22365, g1,c25838, g1,c15875, g1,c18594, g1,c25925, g1,c22122, g1,c26451, g1,c18303, g1,c20430, g1,c22416, g4,c21880, g1,c25889, g1,c20884, g1,c23018, g1,c22015, g1,c22943, g1,c1966, g1,c25016, g1,c25731, g1,c24684, g1,c24773, g1,c25253, g2,c25253, g1,c18353, g1,c26684, g1,c23406, g1,c18517, g1,c23856, g1,c22936, g1,c24337, g1,c25710, g1,c23404, g1,c20511, g1,c25418, g1,c15972, g1,c24789, g1,c167…
GO:0005524	ATP binding	molecular function	1	22	291	2343	21672	c20100, g1,c19566, g1,c23751, g1,c25710, g1,c24705, g3,c23406, g1,c25040, g1,c24684, g1,c26330, g1,c24705, g1,c23005, g1,c22943, g1,c21573, g1,c25950, g1,c23018, g1,c22167, g1,c22384, g1,c21583, g1,c25467, g1,c25838, g1,c20055, g1,c25925, g1
GO:0072522	purine-containing compound biosynthetic process	biological process	1	1	291	428	21672	c22258, g1
GO:0043170	macromolecule metabolic process	biological process	1	87	291	7723	21672	c24222, g1,c23930, g1,c19609, g1,c21769, g1,c21006, g1,c24062, g1,c23405, g1,c21721, g1,c19993, g1,c2648, g1,c23301, g1,c20495, g1,c39017, g1,c21865, g1,c19812, g2,c21838, g1,c16714, g1,c26623, g1,c25783, g1,c22001, g1,c6643, g1,c24337, g1,c21108, g1,c11792, g1,c24773, g1,c1974, g1,c25040, g1,c24688, g1,c18517, g1,c26197, g1,c23018, g1,c19549, g1,c1966, g1,c18594, g1,c15875, g1,c25925, g1,c26451,…
GO:0006281	DNA repair	biological process	1	1	291	314	21672	c22365, g1
GO:0008168	methyltransferase activity	molecular function	1	1	291	339	21672	c18594, g1
GO:0030001	metal ion transport	biological process	1	3	291	599	21672	c21865, g1,c9941, g2,c38857, g1
GO:0032559	adenyl ribonucleotide binding	molecular function	1	22	291	2352	21672	c19566, g1,c20100, g1,c23751, g1,c25710, g1,c25040, g1,c24705, g3,c23406, g1,c24684, g1,c26330, g1,c24705, g1,c21573, g1,c22943, g1,c23005, g1,c23018, g1,c25950, g1,c22384, g1,c21583, g1,c25467, g1,c22167, g1,c20055, g1,c25925, g1,c25838, g1
GO:0017076	purine nucleotide binding	molecular function	1	27	291	2878	21672	c25467, g1,c21583, g1,c22384, g1,c22167, g1,c21840, g1,c25925, g1,c20055, g1,c15972, g1,c25838, g1,c21573, g1,c23005, g1,c22943, g1,c23018, g1,c25950, g1,c25889, g1,c25040, g1,c23406, g1,c24705, g3,c24705, g1,c26330, g1,c25880, g2,c24684, g1,c19566, g1,c23404, g1,c20100, g1,c23751, g1,c25710, g1
GO:2000112	regulation of cellular macromolecule biosynthetic process	biological process	1	16	291	1826	21672	c22015, g1,c25889, g1,c20884, g1,c22643, g1,c22808, g1,c25418, g1,c19812, g2,c15875, g1,c16714, g1,c24337, g1,c24222, g1,c18353, g1,c26684, g1,c23856, g1,c25880, g2,c11792, g1
GO:0051649	establishment of localization in cell	biological process	1	5	291	794	21672	c17485, g1,c21840, g1,c21343, g1,c27060, g1,c21838, g1
GO:0010556	regulation of macromolecule biosynthetic process	biological process	1	16	291	1829	21672	c24337, g1,c24222, g1,c26684, g1,c18353, g1,c23856, g1,c25880, g2,c11792, g1,c22015, g1,c25889, g1,c20884, g1,c22643, g1,c22808, g1,c25418, g1,c19812, g2,c15875, g1,c16714, g1
GO:0031326	regulation of cellular biosynthetic process	biological process	1	16	291	1829	21672	c23856, g1,c26684, g1,c18353, g1,c11792, g1,c25880, g2,c24337, g1,c24222, g1,c22808, g1,c16714, g1,c25418, g1,c19812, g2,c15875, g1,c22015, g1,c22643, g1,c20884, g1,c25889, g1
GO:0016469	proton-transporting two-sector ATPase complex	cellular component	1	1	291	424	21672	c23406, g1
GO:0009889	regulation of biosynthetic process	biological process	1	16	291	1833	21672	c24337, g1,c24222, g1,c11792, g1,c25880, g2,c23856, g1,c26684, g1,c18353, g1,c22643, g1,c25889, g1,c20884, g1,c22015, g1,c16714, g1,c25418, g1,c19812, g2,c15875, g1,c22808, g1
GO:0001071	nucleic acid binding transcription factor activity	molecular function	1	4	291	724	21672	c24337, g1,c15875, g1,c25418, g1,c16714, g1
GO:0003700	sequence-specific DNA binding transcription factor activity	molecular function	1	4	291	724	21672	c16714, g1,c15875, g1,c24337, g1,c25418, g1
GO:0051252	regulation of RNA metabolic process	biological process	1	14	291	1575	21672	c26684, g1,c22808, g1,c18353, g1,c23856, g1,c18517, g1,c25880, g2,c21769, g1,c25418, g1,c15875, g1,c16714, g1,c22015, g1,c24222, g1,c24337, g1,c20884, g1
GO:0005783	endoplasmic reticulum	cellular component	1	1	291	395	21672	c19549, g1
GO:0019219	regulation of nucleobase-containing compound metabolic process	biological process	1	16	291	1719	21672	c24337, g1,c24222, g1,c24684, g1,c25731, g1,c25880, g2,c21769, g1,c18517, g1,c23856, g1,c26684, g1,c18353, g1,c20884, g1,c22015, g1,c16714, g1,c15875, g1,c25418, g1,c22808, g1
GO:0051171	regulation of nitrogen compound metabolic process	biological process	1	16	291	1719	21672	c24337, g1,c24222, g1,c23856, g1,c18517, g1,c26684, g1,c18353, g1,c24684, g1,c21769, g1,c25880, g2,c25731, g1,c22015, g1,c20884, g1,c22808, g1,c16714, g1,c15875, g1,c25418, g1
GO:0042623	ATPase activity, coupled	molecular function	1	2	291	477	21672	c26330, g1,c24684, g1
GO:0006974	response to DNA damage stimulus	biological process	1	1	291	334	21672	c22365, g1
GO:0004672	protein kinase activity	molecular function	1	4	291	653	21672	c25040, g1,c21583, g1,c21163, g1,c25731, g1
GO:0006725	cellular aromatic compound metabolic process	biological process	1	55	291	4970	21672	c18353, g1,c26684, g1,c23406, g1,c23856, g1,c18517, g1,c24684, g1,c25731, g1,c25253, g1,c25253, g2,c24773, g1,c20511, g1,c23404, g1,c24337, g1,c22936, g1,c25710, g1,c26451, g1,c18303, g1,c22122, g1,c20430, g1,c25838, g1,c18594, g1,c15875, g1,c22365, g1,c25925, g1,c22015, g1,c22943, g1,c25016, g1,c1966, g1,c25889, g1,c20884, g1,c22416, g4,c21880, g1,c23018, g1,c22258, g1,c23405, g1,c24705, g1,c263…
GO:0010468	regulation of gene expression	biological process	1	16	291	1856	21672	c24337, g1,c24222, g1,c23856, g1,c26684, g1,c18353, g1,c11792, g1,c25880, g2,c22015, g1,c22643, g1,c20884, g1,c25889, g1,c22808, g1,c16714, g1,c15875, g1,c25418, g1,c19812, g2
GO:0065007	biological regulation	biological process	1	51	291	4407	21672	c23993, g1,c20597, g2,c22308, g1,c24705, g3,c24705, g1,c26330, g1,c25880, g2,c21769, g1,c22053, g1,c23763, g1,c23930, g1,c24222, g1,c22456, g1,c21840, g1,c22808, g1,c23089, g3,c21163, g1,c25783, g1,c20055, g1,c16714, g1,c20952, g1,c25418, g1,c19812, g2,c23238, g1,c26834, g1,c23005, g1,c22006, g1,c18517, g1,c22345, g1,c23856, g1,c18353, g1,c26684, g1,c21421, g1,c11792, g1,c26939, g1,c25731, g1,c24…
GO:1901360	organic cyclic compound metabolic process	biological process	1	57	291	5137	21672	c22006, g1,c23301, g1,c10710, g1,c25356, g1,c22063, g1,c20495, g1,c19566, g4,c25418, g1,c15972, g1,c16714, g1,c24789, g1,c22808, g1,c21840, g1,c24222, g1,c9941, g2,c26955, g1,c23637, g1,c21997, g1,c26330, g1,c25880, g2,c24705, g1,c21769, g1,c23405, g1,c22258, g1,c21880, g1,c22416, g4,c20884, g1,c25889, g1,c23018, g1,c22943, g1,c22015, g1,c1966, g1,c25016, g1,c22365, g1,c15875, g1,c25838, g1,c1859…
GO:0051716	cellular response to stimulus	biological process	1	24	291	2240	21672	c20055, g1,c25925, g1,c22365, g1,c21163, g1,c23089, g3,c21840, g1,c25889, g1,c25050, g1,c23005, g1,c26834, g1,c25253, g2,c24705, g1,c26330, g1,c25880, g2,c25731, g1,c23993, g1,c22345, g1,c24705, g3,c21421, g1,c20597, g2,c24337, g1,c20518, g1,c26616, g1,c20100, g1
GO:0030554	adenyl nucleotide binding	molecular function	1	22	291	2418	21672	c25950, g1,c23018, g1,c22943, g1,c23005, g1,c21573, g1,c25838, g1,c25925, g1,c20055, g1,c22167, g1,c25467, g1,c21583, g1,c22384, g1,c23751, g1,c25710, g1,c20100, g1,c19566, g1,c24705, g1,c26330, g1,c24684, g1,c23406, g1,c24705, g3,c25040, g1
GO:0003676	nucleic acid binding	molecular function	1	35	291	3474	21672	c10710, g1,c19993, g1,c23005, g1,c16714, g1,c24789, g1,c19812, g2,c25418, g1,c22808, g1,c24222, g1,c21997, g1,c25880, g2,c17075, g1,c23018, g1,c22643, g1,c25889, g1,c20884, g1,c15214, g1,c21880, g1,c22416, g4,c24859, g1,c25769, g1,c1966, g1,c25925, g1,c23786, g1,c20430, g1,c26451, g1,c18303, g1,c22170, g3,c20180, g2,c11792, g1,c24684, g1,c23856, g1,c19311, g1,c23406, g1,c18353, g1
GO:0016070	RNA metabolic process	biological process	1	26	291	2659	21672	c18353, g1,c26684, g1,c23405, g1,c23856, g1,c18517, g1,c25880, g2,c21769, g1,c22936, g1,c24337, g1,c24222, g1,c23637, g1,c22808, g1,c25418, g1,c18594, g1,c15875, g1,c24789, g1,c16714, g1,c22943, g1,c22015, g1,c22063, g1,c20495, g1,c1966, g1,c22416, g4,c20884, g1,c23301, g1,c23018, g1
GO:0050789	regulation of biological process	biological process	1	47	291	4177	21672	c21198, g1,c24337, g1,c20518, g1,c26616, g1,c20100, g1,c11792, g1,c24684, g1,c25731, g1,c18517, g1,c23856, g1,c22345, g1,c21421, g1,c26684, g1,c18353, g1,c22643, g1,c20884, g1,c25889, g1,c25050, g1,c22015, g1,c25925, g1,c15875, g1,c24876, g1,c24222, g1,c23930, g1,c22053, g1,c23763, g1,c21769, g1,c26330, g1,c25880, g2,c24705, g1,c23993, g1,c24705, g3,c22308, g1,c20597, g2,c23238, g1,c23005, g1,c26…
GO:0006139	nucleobase-containing compound metabolic process	biological process	1	49	291	4536	21672	c25889, g1,c20884, g1,c22416, g4,c23018, g1,c22943, g1,c22015, g1,c1966, g1,c18594, g1,c15875, g1,c22365, g1,c25925, g1,c18303, g1,c26451, g1,c22122, g1,c20430, g1,c24337, g1,c22936, g1,c25710, g1,c20511, g1,c23404, g1,c24684, g1,c25731, g1,c24773, g1,c26684, g1,c18353, g1,c23406, g1,c18517, g1,c23856, g1,c10710, g1,c23301, g1,c20495, g1,c22063, g1,c19566, g4,c15972, g1,c25418, g1,c24789, g1,c167…
GO:0016020	membrane	cellular component	1	66	291	5613	21672	c25050, g1,c19549, g1,c23989, g1,c17485, g1,c25859, g1,c21861, g1,c25925, g1,c26616, g1,c20518, g1,c21896, g1,c23540, g1,c23098, g1,c11792, g1,c23468, g1,c25731, g1,c23301, g1,c19165, g1,c31140, g1,c20952, g1,c27060, g1,c20055, g1,c24852, g1,c21838, g1,c21865, g1,c17572, g1,c9941, g2,c26530, g1,c24062, g1,c20317, g1,c20597, g2,c17400, g1,c26330, g1,c24683, g1,c22357, g1,c25361, g1,c22015, g1,c470…
GO:0022804	active transmembrane transporter activity	molecular function	1	1	291	423	21672	c26330, g1
GO:0005623	cell	cellular component	1	87	291	8209	21672	c31140, g1,c22737, g1,c27060, g1,c20055, g1,c16714, g1,c19812, g2,c24852, g1,c15972, g1,c21838, g1,c20495, g1,c19993, g1,c21721, g1,c26530, g1,c20317, g1,c24705, g3,c26330, g1,c21769, g1,c17572, g1,c26955, g1,c17485, g1,c22167, g1,c26451, g1,c18074, g1,c18303, g1,c25925, g1,c26628, g1,c15875, g1,c1966, g1,c19549, g1,c24688, g1,c21421, g1,c11792, g1,c25731, g1,c24684, g1,c21108, g1,c25710, g1,c243…
GO:0044464	cell part	cellular component	1	87	291	8209	21672	c20495, g1,c19993, g1,c21721, g1,c22737, g1,c31140, g1,c24852, g1,c21838, g1,c15972, g1,c19812, g2,c27060, g1,c16714, g1,c20055, g1,c17572, g1,c26955, g1,c24705, g3,c20317, g1,c26530, g1,c21769, g1,c26330, g1,c19549, g1,c1966, g1,c18303, g1,c26451, g1,c18074, g1,c22167, g1,c17485, g1,c15875, g1,c26628, g1,c25925, g1,c21108, g1,c24337, g1,c25710, g1,c21421, g1,c24688, g1,c24684, g1,c25731, g1,c117…
GO:0051641	cellular localization	biological process	1	5	291	851	21672	c21840, g1,c21343, g1,c17485, g1,c21838, g1,c27060, g1
GO:0090407	organophosphate biosynthetic process	biological process	1	2	291	610	21672	c31549, g1,c22416, g4
GO:0009165	nucleotide biosynthetic process	biological process	1	1	291	473	21672	c22416, g4
GO:0005216	ion channel activity	molecular function	1	1	291	358	21672	c38857, g1
GO:0016301	kinase activity	molecular function	1	7	291	1010	21672	c25731, g1,c26330, g1,c25710, g1,c21163, g1,c23005, g1,c21583, g1,c25040, g1
GO:0022838	substrate-specific channel activity	molecular function	1	1	291	359	21672	c38857, g1
GO:1901293	nucleoside phosphate biosynthetic process	biological process	1	1	291	478	21672	c22416, g4
GO:0044267	cellular protein metabolic process	biological process	1	31	291	3743	21672	c18074, g1,c22170, g3,c24876, g1,c21583, g1,c19812, g2,c17117, g1,c22943, g1,c19549, g1,c21721, g1,c25889, g1,c19993, g1,c23152, g1,c22416, g4,c18044, g1,c22009, g1,c10710, g1,c18370, g1,c22643, g1,c22308, g1,c19311, g1,c25040, g1,c24688, g1,c11792, g1,c21006, g1,c21364, g2,c19609, g1,c22053, g1,c23930, g1,c20180, g2,c21198, g1,c20522, g1
GO:0043565	sequence-specific DNA binding	molecular function	1	2	291	532	21672	c24222, g1,c16714, g1
GO:0044446	intracellular organelle part	cellular component	1	28	291	3130	21672	c20317, g1,c26684, g1,c42901, g1,c26330, g1,c25731, g1,c24634, g1,c23404, g1,c20100, g1,c39084, g1,c17572, g1,c20180, g2,c20522, g1,c31140, g1,c24634, g2,c22170, g3,c17485, g1,c21838, g1,c15972, g1,c25925, g1,c16714, g1,c27060, g1,c22015, g1,c1966, g1,c19549, g1,c22416, g4,c19993, g1,c47020, g1,c10710, g1
GO:0050794	regulation of cellular process	biological process	1	43	291	3926	21672	c21163, g1,c23089, g3,c22808, g1,c21840, g1,c16714, g1,c20055, g1,c25418, g1,c19812, g2,c23005, g1,c26834, g1,c23993, g1,c24705, g3,c22308, g1,c20597, g2,c25880, g2,c26330, g1,c21769, g1,c24705, g1,c22053, g1,c24222, g1,c23930, g1,c24876, g1,c25925, g1,c15875, g1,c25050, g1,c22015, g1,c22643, g1,c25889, g1,c20884, g1,c23856, g1,c18517, g1,c22345, g1,c26684, g1,c18353, g1,c21421, g1,c11792, g1,c24…
GO:0006355	regulation of transcription, DNA-dependent	biological process	1	12	291	1507	21672	c20884, g1,c24337, g1,c24222, g1,c22015, g1,c16714, g1,c25880, g2,c25418, g1,c15875, g1,c23856, g1,c26684, g1,c22808, g1,c18353, g1
GO:0015267	channel activity	molecular function	1	1	291	370	21672	c38857, g1
GO:0022803	passive transmembrane transporter activity	molecular function	1	1	291	370	21672	c38857, g1
GO:2001141	regulation of RNA biosynthetic process	biological process	1	12	291	1511	21672	c24337, g1,c24222, g1,c20884, g1,c22015, g1,c16714, g1,c15875, g1,c25418, g1,c25880, g2,c23856, g1,c22808, g1,c26684, g1,c18353, g1
GO:0044422	organelle part	cellular component	1	28	291	3157	21672	c47020, g1,c10710, g1,c22416, g4,c19993, g1,c1966, g1,c19549, g1,c22015, g1,c25925, g1,c27060, g1,c16714, g1,c21838, g1,c15972, g1,c17485, g1,c31140, g1,c24634, g2,c22170, g3,c20522, g1,c20180, g2,c39084, g1,c17572, g1,c20100, g1,c23404, g1,c26330, g1,c42901, g1,c25731, g1,c24634, g1,c20317, g1,c26684, g1
GO:0015075	ion transmembrane transporter activity	molecular function	1	10	291	1436	21672	c38857, g1,c25375, g1,c31140, g1,c23540, g1,c42901, g1,c44009, g1,c21865, g1,c17572, g1,c9941, g2,c47020, g1
GO:0090304	nucleic acid metabolic process	biological process	1	34	291	3381	21672	c25925, g1,c15875, g1,c18594, g1,c22365, g1,c20430, g1,c18303, g1,c26451, g1,c23018, g1,c20884, g1,c22416, g4,c1966, g1,c22015, g1,c22943, g1,c24773, g1,c23856, g1,c18517, g1,c26684, g1,c18353, g1,c24337, g1,c22936, g1,c24789, g1,c16714, g1,c25418, g1,c22808, g1,c10710, g1,c23301, g1,c22063, g1,c20495, g1,c25880, g2,c21769, g1,c23405, g1,c23637, g1,c24222, g1,c21997, g1
GO:0006351	transcription, DNA-dependent	biological process	1	15	291	1884	21672	c24337, g1,c20884, g1,c24222, g1,c1966, g1,c22063, g1,c22015, g1,c24789, g1,c16714, g1,c15875, g1,c25418, g1,c25880, g2,c23856, g1,c26684, g1,c18353, g1,c22808, g1
GO:0032774	RNA biosynthetic process	biological process	1	15	291	1894	21672	c22808, g1,c26684, g1,c18353, g1,c23856, g1,c15875, g1,c25880, g2,c25418, g1,c16714, g1,c24789, g1,c22063, g1,c22015, g1,c1966, g1,c20884, g1,c24337, g1,c24222, g1
GO:1901362	organic cyclic compound biosynthetic process	biological process	1	25	291	2847	21672	c24337, g1,c24222, g1,c23637, g1,c18353, g1,c26684, g1,c23856, g1,c22258, g1,c26330, g1,c25880, g2,c21769, g1,c22015, g1,c22063, g1,c1966, g1,c25016, g1,c22416, g4,c20884, g1,c22006, g1,c23301, g1,c23018, g1,c22808, g1,c25418, g1,c25838, g1,c15875, g1,c16714, g1,c24789, g1
GO:0016887	ATPase activity	molecular function	1	3	291	698	21672	c25925, g1,c26330, g1,c24684, g1
GO:0022891	substrate-specific transmembrane transporter activity	molecular function	1	10	291	1547	21672	c23540, g1,c38857, g1,c25375, g1,c31140, g1,c21865, g1,c44009, g1,c42901, g1,c17572, g1,c9941, g2,c47020, g1
GO:0044271	cellular nitrogen compound biosynthetic process	biological process	1	24	291	2807	21672	c25467, g1,c22122, g1,c22808, g1,c16714, g1,c24789, g1,c25838, g1,c15875, g1,c25418, g1,c25016, g1,c1966, g1,c22063, g1,c22015, g1,c20884, g1,c22416, g4,c22258, g1,c23856, g1,c18353, g1,c26684, g1,c26330, g1,c25880, g2,c21769, g1,c23637, g1,c24222, g1,c24337, g1
GO:0043412	macromolecule modification	biological process	1	12	291	1588	21672	c21006, g1,c23405, g1,c21583, g1,c25040, g1,c24876, g1,c22308, g1,c20522, g1,c21198, g1,c23930, g1,c22416, g4,c22053, g1,c19609, g1
GO:0006811	ion transport	biological process	1	12	291	1763	21672	c17572, g1,c9941, g2,c47020, g1,c38857, g1,c31140, g1,c23406, g1,c25375, g1,c23540, g1,c23517, g1,c21865, g1,c44009, g1,c42901, g1
GO:0006464	cellular protein modification process	biological process	1	10	291	1422	21672	c22053, g1,c19609, g1,c20522, g1,c21198, g1,c23930, g1,c21583, g1,c25040, g1,c24876, g1,c22308, g1,c21006, g1
GO:0036211	protein modification process	biological process	1	10	291	1422	21672	c21006, g1,c22308, g1,c24876, g1,c25040, g1,c21583, g1,c23930, g1,c21198, g1,c20522, g1,c19609, g1,c22053, g1
GO:0019438	aromatic compound biosynthetic process	biological process	1	22	291	2698	21672	c23637, g1,c24337, g1,c24222, g1,c26330, g1,c25880, g2,c21769, g1,c22258, g1,c23856, g1,c26684, g1,c18353, g1,c20884, g1,c22416, g4,c25016, g1,c1966, g1,c22063, g1,c22015, g1,c16714, g1,c24789, g1,c15875, g1,c25838, g1,c25418, g1,c22808, g1
GO:0043234	protein complex	cellular component	1	30	291	3510	21672	c19549, g1,c10710, g1,c47020, g1,c26451, g1,c21163, g1,c31140, g1,c22167, g1,c25375, g1,c20430, g1,c17485, g1,c44009, g1,c24852, g1,c21838, g1,c15972, g1,c16714, g1,c25925, g1,c23404, g1,c20100, g1,c17572, g1,c21108, g1,c39084, g1,c26955, g1,c25710, g1,c21421, g1,c23406, g1,c23400, g1,c23993, g1,c25731, g1,c42901, g1,c26330, g1
GO:0043231	intracellular membrane-bounded organelle	cellular component	1	36	291	4024	21672	c31181, g1,c17572, g1,c42901, g1,c26330, g1,c25880, g2,c20317, g1,c10710, g1,c21343, g1,c22063, g1,c20495, g1,c44009, g1,c25418, g1,c21838, g1,c20739, g1,c16714, g1,c27060, g1,c24789, g1,c31140, g1,c22737, g1,c24634, g2,c24337, g1,c20522, g1,c24634, g1,c24684, g1,c26684, g1,c18353, g1,c23856, g1,c47020, g1,c22015, g1,c17117, g1,c1966, g1,c19549, g1,c15875, g1,c25925, g1,c21907, g1,c17485, g1
GO:0043227	membrane-bounded organelle	cellular component	1	36	291	4025	21672	c20317, g1,c25880, g2,c42901, g1,c26330, g1,c17572, g1,c31181, g1,c22737, g1,c24634, g2,c31140, g1,c20739, g1,c44009, g1,c25418, g1,c21838, g1,c27060, g1,c24789, g1,c16714, g1,c20495, g1,c22063, g1,c21343, g1,c10710, g1,c26684, g1,c18353, g1,c23856, g1,c24634, g1,c24684, g1,c24337, g1,c20522, g1,c17485, g1,c21907, g1,c15875, g1,c25925, g1,c17117, g1,c22015, g1,c19549, g1,c1966, g1,c47020, g1
GO:0044260	cellular macromolecule metabolic process	biological process	1	69	291	6923	21672	c21583, g1,c20430, g1,c22170, g3,c22365, g1,c17117, g1,c22015, g1,c22943, g1,c22643, g1,c18370, g1,c20884, g1,c25889, g1,c22416, g4,c23856, g1,c19311, g1,c18353, g1,c26684, g1,c20511, g1,c20522, g1,c21198, g1,c22936, g1,c20180, g2,c24634, g2,c22808, g1,c24789, g1,c25418, g1,c22063, g1,c22009, g1,c10710, g1,c23152, g1,c18044, g1,c23400, g1,c22308, g1,c25880, g2,c22053, g1,c21364, g2,c20300, g1,c21…
GO:0018130	heterocycle biosynthetic process	biological process	1	22	291	2762	21672	c22808, g1,c16714, g1,c24789, g1,c15875, g1,c25838, g1,c25418, g1,c25016, g1,c1966, g1,c22063, g1,c22015, g1,c20884, g1,c22416, g4,c22258, g1,c23856, g1,c26684, g1,c18353, g1,c25880, g2,c26330, g1,c21769, g1,c23637, g1,c24337, g1,c24222, g1
GO:0034654	nucleobase-containing compound biosynthetic process	biological process	1	17	291	2390	21672	c25880, g2,c23856, g1,c22258, g1,c26684, g1,c18353, g1,c24337, g1,c24222, g1,c16714, g1,c24789, g1,c25418, g1,c15875, g1,c22808, g1,c22416, g4,c20884, g1,c1966, g1,c22015, g1,c22063, g1
GO:0005634	nucleus	cellular component	1	18	291	2716	21672	c25880, g2,c24684, g1,c23856, g1,c18353, g1,c26684, g1,c24337, g1,c25925, g1,c27060, g1,c24789, g1,c16714, g1,c25418, g1,c15875, g1,c21907, g1,c10710, g1,c1966, g1,c22015, g1,c22063, g1,c20495, g1
GO:0005515	protein binding	molecular function	1	31	291	3605	21672	c24876, g1,c20828, g1,c20430, g1,c24284, g1,c21163, g1,c23089, g3,c21840, g1,c25783, g1,c25925, g1,c18594, g1,c22365, g1,c21343, g1,c25889, g1,c21880, g1,c23098, g1,c22308, g1,c17075, g1,c23030, g1,c25731, g1,c26330, g1,c19609, g1,c22568, g1,c22053, g1,c20100, g1,c24889, g1,c26955, g1,c19367, g1,c9941, g2,c21198, g1,c23930, g1,c24727, g1
GO:0005667	transcription factor complex	cellular component	1	1	291	865	21672	c16714, g1
GO:0031981	nuclear lumen	cellular component	1	3	291	1381	21672	c10710, g1,c16714, g1,c1966, g1
GO:0070013	intracellular organelle lumen	cellular component	1	3	291	1424	21672	c1966, g1,c10710, g1,c16714, g1
GO:0043233	organelle lumen	cellular component	1	3	291	1425	21672	c1966, g1,c10710, g1,c16714, g1
GO:0031974	membrane-enclosed lumen	cellular component	1	3	291	1442	21672	c10710, g1,c16714, g1,c1966, g1
GO:0044451	nucleoplasm part	cellular component	1	1	291	1045	21672	c16714, g1
GO:0005654	nucleoplasm	cellular component	1	1	291	1057	21672	c16714, g1
GO:0044428	nuclear part	cellular component	1	4	291	1648	21672	c1966, g1,c27060, g1,c16714, g1,c10710, g1
